# Supplementary material for: Visible-light-driven alkene dicarboxylation with formate and CO2 under mild conditions
Source: Royal Society of Chemistry journal article supplement (doi:10.1039/d3sc04431a), 2024-01-01

## ***Electronic Supplementary Information***

### **Visible-light-driven alkene dicarboxylation with formate and CO<sub>2</sub> under mild conditions**

Fulin Zhang,<sup>a</sup> Xiao-Yang Wu,<sup>a</sup> Pan-Pan Gao,<sup>a</sup> Hao Zhang,<sup>a</sup> Zhu Li,<sup>a</sup> Shangde Ai<sup>a</sup> and Gang Li<sup>\*ab</sup>

<sup>a</sup>Frontiers Science Center for Transformative Molecules, Shanghai Key Laboratory for Molecular Engineering of Chiral Drugs, School of Chemistry and Chemical Engineering, Zhang Jiang Institute for Advanced Study, Shanghai Jiao Tong University, Shanghai 200240, China

<sup>b</sup>Fujian Institute of Research on the Structure of Matter, Chinese Academy of Sciences, Fujian 350002, China

## Table of Contents

|                                                                 |     |
|-----------------------------------------------------------------|-----|
| 1. General information .....                                    | S3  |
| 2. Optimization of the reaction conditions.....                 | S4  |
| 3. General procedures.....                                      | S8  |
| 4. Mechanistic Experiments and Product Application.....         | S25 |
| 5. References.....                                              | S33 |
| 6. Copies of $^1\text{H}$ and $^{13}\text{C}$ NMR spectra ..... | S35 |

## 1. General information

Chemicals were purchased from commercial suppliers and used without further purification unless otherwise stated. Solvents were generally dried over 4 Å molecular sieves. Unless otherwise indicated, all reactions were set up in glovebox in Schlenk tubes. Flash column chromatography was performed using silica gel 60 (200-300 mesh) or preparative thin layer chromatography. Reaction was monitored by thin layer chromatography (TLC) and was visualized by ultraviolet light (254 nm). Melting points were recorded using a SRS Melting Point thermometer.  $^1\text{H}$  and  $^{13}\text{C}$  NMR spectra were recorded on Bruker-BioSpin AVANCE III HD 400MHz spectrometer and Bruker Avance NEO 500MHz. Chemical shifts are reported parts per million (ppm) referenced to  $\text{CDCl}_3$  ( $\delta$  7.26 ppm), tetramethylsilane (TMS,  $\delta$  0.00 ppm),  $\text{DMSO}-d_6$  ( $\delta$  2.50 ppm),  $\text{CD}_3\text{OD}$  ( $\delta$  3.31 ppm) for  $^1\text{H}$  NMR;  $\text{CDCl}_3$  ( $\delta$  77.16 ppm),  $\text{DMSO}-d_6$  ( $\delta$  40.00 ppm),  $\text{CD}_3\text{OD}$  ( $\delta$  49.00 ppm) for  $^{13}\text{C}$  NMR. Data for  $^1\text{H}$  NMR are recorded as follows: chemical shift ( $\delta$ , ppm), multiplicity (s = singlet; d = doublet; t = triplet; q = quarter; p = pentet; m = multiplet; br = broad), coupling constant (Hz), integration. Data for  $^{13}\text{C}$  NMR are reported in terms of chemical shift ( $\delta$ , ppm). HRMS were obtained on Solarix 7.0T and Waters Micromass Q-Tof Premier and XEVO-G2XSQTOF mass spectrometer.  $\text{CO}_2$  gas (Purity: 99.999%) was purchased from Air Liquide. The light source used for the photocatalyzed experiment was a 30 W blue LED strips, purchased from Xuzhou Ai Jia electronic technology Co. LTD. (China) and 30W blue LED purchased from Shenzhen Xin Xing Yuan electronic technology Co. LTD. (China)

## 2. Optimization of the reaction conditions

An oven-dried Schlenk tube (25 mL) containing a stirring bar was cooled to room temperature. The Schlenk tube was then introduced in a glovebox, where it was charged with base (0.6 mmol, 3.0 equiv), HCOOK (50.5 mg, 0.6 mmol, 3.0 equiv), photocatalyst (8.0 mg, 6.2 mol %), HAT (30 mol%), alkene (0.20 mmol, 1.0 equiv, if solid). The tube was taken out of the glovebox. Subsequently, the degassed anhydrous DMSO (2 mL, 0.1 M) and the alkene (0.2 mmol, if liquid) were added into the tube via syringe. Then the tube was evacuated and back-filled with CO<sub>2</sub> for 10 times. Finally, the tube was placed under 30 W blue LED strips ( $\lambda = 450 - 455$  nm, 3.0 cm - 4.5 cm away from the LEDs, with fans to keep the reaction temperature at 25 - 33 °C) and stirred for 24 h. Then, the mixture was quenched with H<sub>2</sub>O and 2 mL of HCl (2 N), extracted with EtOAc three times. The resulting solution was concentrated by rotary evaporation and the yield of crude products was determined via <sup>1</sup>H NMR using CH<sub>2</sub>Br<sub>2</sub> as internal standard.

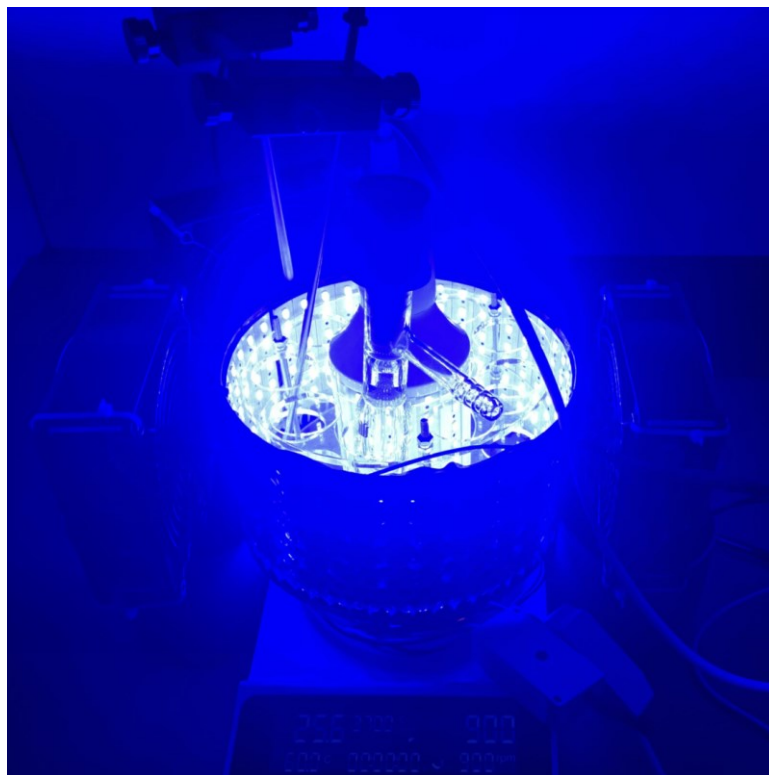

## Photocatalysts:

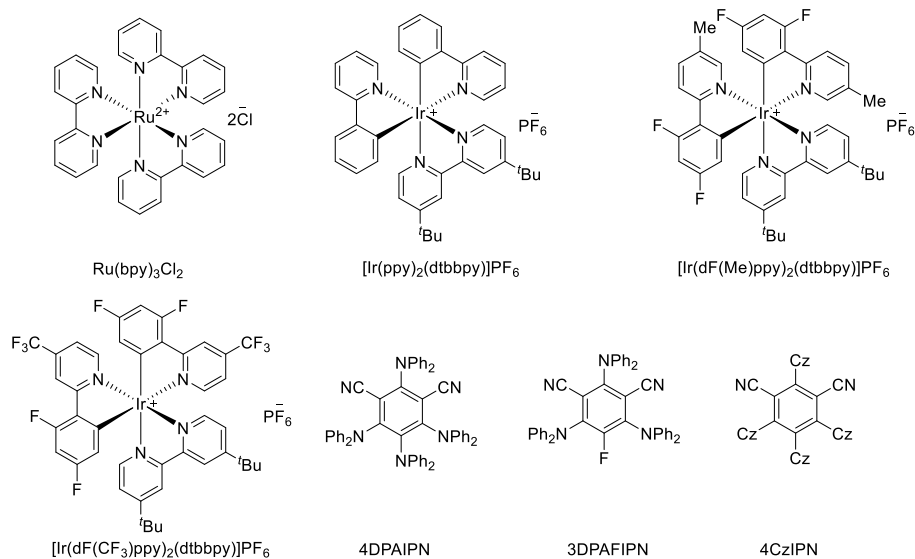

**Table S1. Screening of Bases<sup>a</sup>**

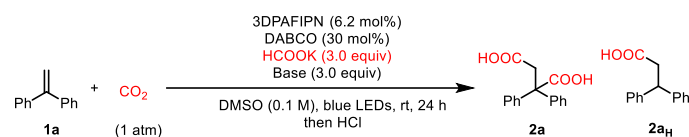

| Entry           | Base                            | 2a [%] <sup>b</sup> | 2a <sub>H</sub> [%] <sup>b</sup> |
|-----------------|---------------------------------|---------------------|----------------------------------|
| 1               | None                            | 11%                 | 66%                              |
| 2               | CsF                             | 23%                 | 54%                              |
| 3               | Cs <sub>2</sub> CO <sub>3</sub> | 40%                 | 12%                              |
| 4               | KF                              | 29%                 | 36%                              |
| 5               | <sup>t</sup> BuOLi              | 42%                 | 50%                              |
| 6               | CsOAc                           | 38%                 | 68%                              |
| 7               | NaOAc                           | 44%                 | 31%                              |
| 8               | KOAc                            | 23%                 | 34%                              |
| 9               | LiOAc                           | 13%                 | 40%                              |
| 10              | Na <sub>2</sub> CO <sub>3</sub> | 24%                 | 32%                              |
| 11              | K <sub>3</sub> PO <sub>4</sub>  | 44%                 | 50%                              |
| 12              | KOH                             | 27%                 | 54%                              |
| 13              | Na <sub>3</sub> PO <sub>4</sub> | 23%                 | 52%                              |
| 14              | NaOCH <sub>3</sub>              | 23%                 | 60%                              |
| 15              | DMAP                            | 26%                 | 34%                              |
| 16              | DBU                             | --                  | 18%                              |
| 17              | Pyridine                        | 8%                  | 40%                              |
| 18              | 1,10-phenanthroline             | 16%                 | 18%                              |
| 19 <sup>c</sup> | Cs <sub>2</sub> CO <sub>3</sub> | 59%                 | --                               |
| 20 <sup>d</sup> | K <sub>3</sub> PO <sub>4</sub>  | 64%                 | --                               |

|                       |              |            |            |
|-----------------------|--------------|------------|------------|
| <b>21<sup>e</sup></b> | <b>NaOAc</b> | <b>43%</b> | <b>48%</b> |
|-----------------------|--------------|------------|------------|

<sup>a</sup>Reaction conditions: 1,1-diphenylethylene (0.2 mmol), 3DPAFIPN (6.2 mol%), DABCO (0.06 mmol), Base (0.6 mmol), HCOOK (0.6 mmol) in DMSO (2 mL), 1 atm CO<sub>2</sub>, 30 W blue LEDs (450 - 455 nm), rt, 24 h. DABCO = triethylenediamine. <sup>b</sup>Yield was determined by <sup>1</sup>H NMR with CH<sub>2</sub>Br<sub>2</sub> as internal standard. <sup>c</sup>Cs<sub>2</sub>CO<sub>3</sub> (5.0 equiv). <sup>d</sup>K<sub>3</sub>PO<sub>4</sub> (5.0 equiv). <sup>e</sup>NaOAc (5.0 equiv).

**Table S2. Screening of cooperative bases<sup>a</sup>**

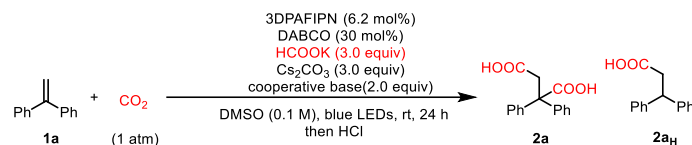

| Entry                | cooperative base               | 2a [%] <sup>b</sup> | 2a <sub>H</sub> [%] <sup>b</sup> |
|----------------------|--------------------------------|---------------------|----------------------------------|
| <b>1</b>             | KPF <sub>6</sub>               | 55%                 | --                               |
| <b>2</b>             | KOPiv                          | 31%                 | 38%                              |
| <b>3</b>             | KF                             | 42%                 | --                               |
| <b>4</b>             | K <sub>3</sub> PO <sub>4</sub> | 91%(88%)            | --                               |
| <b>5<sup>c</sup></b> | K <sub>3</sub> PO <sub>4</sub> | 74%                 | --                               |
| <b>6<sup>d</sup></b> | K <sub>3</sub> PO <sub>4</sub> | 65%                 | --                               |
| <b>7<sup>e</sup></b> | K <sub>3</sub> PO <sub>4</sub> | 71%                 | --                               |

<sup>a</sup>Reaction conditions: 1,1-diphenylethylene (0.2 mmol), 3DPAFIPN (6.2 mol%), DABCO (0.06 mmol), Cs<sub>2</sub>CO<sub>3</sub> (0.6 mmol), additive (0.4 mmol), HCOOK (0.6 mmol) in DMSO (2 mL), 1 atm CO<sub>2</sub>, 30 W blue LEDs (450 - 455 nm), rt, 24 h. DABCO = triethylenediamine. <sup>b</sup>Yield was determined by <sup>1</sup>H NMR with CH<sub>2</sub>Br<sub>2</sub> as internal standard. Numbers in parentheses are referred to isolated yields. <sup>c</sup>K<sub>3</sub>PO<sub>4</sub> (1.0 equiv). <sup>d</sup>Cs<sub>2</sub>CO<sub>3</sub> (2.0 equiv) and K<sub>3</sub>PO<sub>4</sub> (1.0 equiv). <sup>e</sup>Cs<sub>2</sub>CO<sub>3</sub> (2.0 equiv).

**Table S3. Screening of HATs<sup>a</sup>**

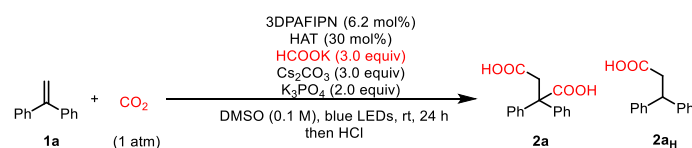

| Entry                | HAT                                    | 2a [%] <sup>b</sup> | 2a <sub>H</sub> [%] <sup>b</sup> |
|----------------------|----------------------------------------|---------------------|----------------------------------|
| <b>1</b>             | quinuclidine                           | 40%                 | --                               |
| <b>2</b>             | Mesna                                  | 56%                 | 20%                              |
| <b>3</b>             | <i>p</i> -Toluenethiol                 | 81%                 | --                               |
| <b>4</b>             | 2-Mercaptobenzoic Acid<br>Methyl Ester | 77%                 | --                               |
| <b>5</b>             | L-Cysteine                             | 50%                 | 48%                              |
| <b>6<sup>c</sup></b> | DABCO                                  | 65%                 | --                               |
| <b>7<sup>d</sup></b> | DABCO                                  | 71%                 | --                               |

<sup>a</sup>Reaction conditions: 1,1-diphenylethylene (0.2 mmol), 3DPAFIPN (6.2 mol%), HAT (0.06 mmol), Cs<sub>2</sub>CO<sub>3</sub> (0.6 mmol), K<sub>3</sub>PO<sub>4</sub> (0.4

mmol), HCOOK (0.6 mmol) in DMSO (2 mL), 1 atm CO<sub>2</sub>, 30 W blue LEDs (450 - 455 nm), rt, 24 h. DABCO = triethylenediamine.

<sup>b</sup>Yield was determined by <sup>1</sup>H NMR with CH<sub>2</sub>Br<sub>2</sub> as internal standard. <sup>c</sup>DABCO (10 mol%). <sup>d</sup>DABCO (20 mol%).

**Table S4. Screening of photocatalysts<sup>a</sup>**

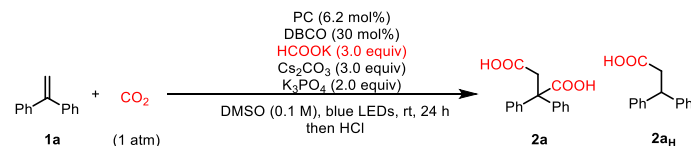

| Entry           | Photocatalyst (PC)                                                 | 2a [%] <sup>b</sup>   | 2a <sub>H</sub> [%] <sup>b</sup> |
|-----------------|--------------------------------------------------------------------|-----------------------|----------------------------------|
| 1               | None                                                               | --                    | --                               |
| 2               | 3DPAFIPN                                                           | 91%(88%) <sup>c</sup> | --                               |
| 3 <sup>d</sup>  | Ru(bpy) <sub>3</sub> Cl <sub>2</sub>                               | --                    | --                               |
| 4 <sup>d</sup>  | Ir(ppy) <sub>2</sub> (dtbbpy)(PF <sub>6</sub> )                    | 7%                    | --                               |
| 5 <sup>d</sup>  | [Ir(dF(CF <sub>3</sub> )ppy) <sub>2</sub> (dtbbpy)]PF <sub>6</sub> | --                    | --                               |
| 6 <sup>d</sup>  | [Ir(dF(Me)ppy) <sub>2</sub> (dtbbpy)]PF <sub>6</sub>               | 20%                   | --                               |
| 7               | 4DPAIPN                                                            | 65%                   | --                               |
| 8               | 4CzIPN                                                             | 39%                   | --                               |
| 9 <sup>e</sup>  | 3DPAFIPN                                                           | 70%                   | --                               |
| 10 <sup>f</sup> | 3DPAFIPN                                                           | 86%                   | --                               |
| 11 <sup>g</sup> | 3DPAFIPN                                                           | --                    | --                               |
| 12 <sup>h</sup> | 3DPAFIPN                                                           | 32%                   | 28%                              |
| 13 <sup>i</sup> | 3DPAFIPN                                                           | --                    | 76%                              |
| 14 <sup>j</sup> | 3DPAFIPN                                                           | --                    | --                               |

<sup>a</sup>Reaction conditions: 1,1-diphenylethylene (0.2 mmol), PC (6.2 mol%), DABCO (0.06 mmol), Cs<sub>2</sub>CO<sub>3</sub> (0.6 mmol), K<sub>3</sub>PO<sub>4</sub> (0.4 mmol), HCOOK (0.6 mmol) in DMSO (2 mL), 1 atm CO<sub>2</sub>, 30 W blue LEDs (450 - 455 nm), rt, 24 h. DABCO = triethylenediamine. <sup>b</sup>Yield was determined by <sup>1</sup>H NMR with CH<sub>2</sub>Br<sub>2</sub> as internal standard. <sup>c</sup>Isolated yield. <sup>d</sup>PC (5.0 mol%). <sup>e</sup>3DPAFIPN (2.0 mol%). <sup>f</sup>3DPAFIPN (4.0 mol%). <sup>g</sup>In darkness. <sup>h</sup>Without DABCO. <sup>i</sup>In N<sub>2</sub> atmosphere. <sup>j</sup>Without HCOOK.

**Table S5. Screening of Solvents**

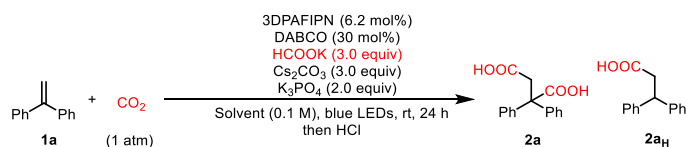

| Entry | Solvent     | 2a [%] <sup>b</sup> | 2a <sub>H</sub> [%] <sup>b</sup> |
|-------|-------------|---------------------|----------------------------------|
| 1     | DMF         | 15%                 | --                               |
| 2     | 1,4-dioxane | --                  | --                               |
| 3     | THF         | 16%                 | --                               |
| 4     | MeCN        | --                  | --                               |
| 5     | DMA         | 17%                 | --                               |

<sup>a</sup>Reaction conditions: 1,1-diphenylethylene (0.2 mmol), 3DPAFIPN (6.2 mol%), DABCO (0.06 mmol), Cs<sub>2</sub>CO<sub>3</sub> (0.6 mmol), K<sub>3</sub>PO<sub>4</sub> (0.4

mmol), HCOOK (0.6 mmol) in solvent (2 mL), 1 atm CO<sub>2</sub>, 30 W blue LEDs (450 - 455 nm), rt, 24 h. DABCO = triethylenediamine.

<sup>b</sup>Yield was determined by <sup>1</sup>H NMR with CH<sub>2</sub>Br<sub>2</sub> as internal standard.

### 3. General procedures

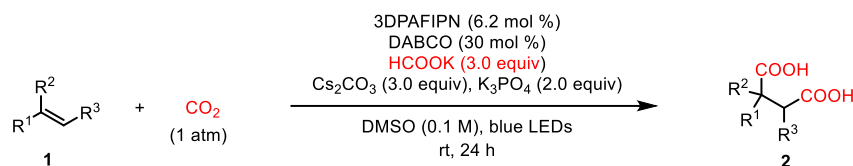

An oven-dried Schlenk tube (25 mL) containing a stirring bar was cooled to room temperature. The Schlenk tube was then introduced in a glovebox, where it was charged with K<sub>3</sub>PO<sub>4</sub> (2.0 equiv, 0.4 mmol, 85.5 mg), Cs<sub>2</sub>CO<sub>3</sub> (3.0 equiv, 0.6 mmol, 195.5 mg), HCOOK (3.0 equiv, 0.6 mmol, 50.5 mg), 3DPAFIPN (6.2 mol%, 8.0 mg, 3DPAFIPN was synthesized following the literature procedures<sup>1</sup>), DABCO (30 mol%), alkene **1** (0.20 mmol, 1.0 equiv, if solid). The tube was taken out of the glovebox. Subsequently, the degassed anhydrous DMSO (2 mL, 0.1 M) and the alkene (0.2 mmol, if liquid) were added into the tube via syringe. Then the tube was evacuated and back-filled with CO<sub>2</sub> for 10 times. Finally, the tube was placed under 30 W blue LED strips ( $\lambda$  = 450 - 455 nm, 3.0 cm - 4.5 cm away from the LEDs, with fans to keep the reaction temperature at 25 - 33 °C) and stirred for 24 h. Then, the mixture was quenched with H<sub>2</sub>O and 2 mL of HCl (2 N), extracted with EtOAc three times. The resulting solution was concentrated by rotary evaporation. The residual was purified by column chromatography on silica gel to give the desired product **2**. If there was traces of DMSO, extraction with H<sub>2</sub>O.

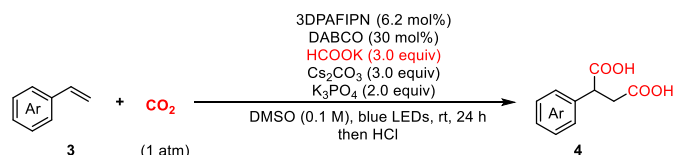

An oven-dried Schlenk tube (25 mL) containing a stirring bar was cooled to room temperature. The Schlenk tube was then introduced in a glovebox, where it was charged with K<sub>3</sub>PO<sub>4</sub> (2.0 equiv, 0.4 mmol, 85.5 mg), Cs<sub>2</sub>CO<sub>3</sub> (3.0 equiv, 0.6 mmol, 195.5 mg), HCOOK (3.0 equiv, 0.6 mmol, 50.5 mg), 3DPAFIPN (6.2 mol%, 8.0 mg),

DABCO (30 mol%, 6.8 mg), alkene (0.20 mmol, 1.0 equiv, if solid). The tube was taken out of the glovebox. Subsequently, the degassed anhydrous DMSO (2 mL, 0.1 M) and the alkene **3** (0.2 mmol, if liquid) were added into the tube via syringe. Then the tube was evacuated and back-filled with CO<sub>2</sub> for 10 times. Finally, the tube was placed under 30 W blue LED strips ( $\lambda$  = 450 - 455 nm, 3.0 cm - 4.5 cm away from the LEDs, with fans to keep the reaction temperature at 25 - 33 °C) and stirred for 24 h. Then, the mixture was quenched with H<sub>2</sub>O and 2 mL of HCl (2 N), extracted with EtOAc three times, then concentrated in vacuo. The resulting solution was concentrated by rotary evaporation. The residual was purified by column chromatography on silica gel to give the desired product **4** (If traces of DMSO were present with product, extract with H<sub>2</sub>O to remove DMSO).

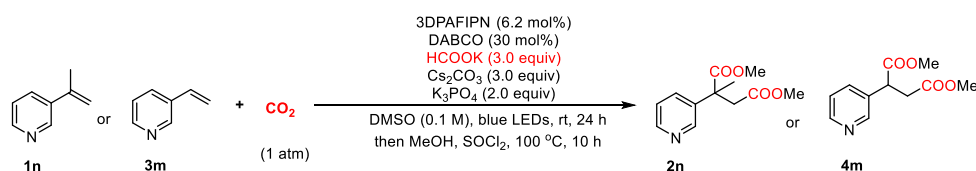

An oven-dried reaction tube (25 mL) containing a stirring bar was cooled to room temperature. The Schlenk tube was then introduced in a glovebox, where it was charged with K<sub>3</sub>PO<sub>4</sub> (2.0 equiv, 0.4 mmol, 85.5 mg), Cs<sub>2</sub>CO<sub>3</sub> (3.0 equiv, 0.6 mmol, 195.5 mg), HCOOK (3.0 equiv, 0.6 mmol, 50.5 mg), 3DPAFIPN (6.2 mol%, 8.0 mg), DABCO (30 mol%, 6.8 mg). The tube was taken out of the glovebox. Subsequently, the degassed anhydrous DMSO (2 mL, 0.1 M) and the alkene **1n** or **3m** (0.2 mmol) were added into the tube via syringe. Then the tube was evacuated and back-filled with CO<sub>2</sub> for 10 times. Finally, the tube was placed under 30 W blue LED strips ( $\lambda$  = 450 - 455 nm, 3.0 cm - 4.5 cm away from the LEDs, with fans to keep the reaction temperature at 25 - 33 °C) light source and stirred at ambient temperature for 24 h. Upon completion of the reaction, then AcOH (0.2 mL) was added and the system was stirred for 10 min at room temperature. The solvent along with other volatile matter was removed directly under reduced pressure at high temperature. The residue was re-dissolved in MeOH (8 mL) and then SOCl<sub>2</sub> (0.8 mL) was added dropwise carefully. The Schlenk tube was capped and stirred at 100 °C for 10 h. After cooled to room

temperature, the mixture was diluted with EtOAc (10 mL) and quenched with saturated aqueous solution of sodium hydrogen carbonate. The reaction was extracted with EtOAc (30 mL  $\times$  3) and the organic layers were combined and dried over Na<sub>2</sub>SO<sub>4</sub>. After concentrated under reduced pressure, crude <sup>1</sup>H NMR spectrum was taken using CH<sub>2</sub>Br<sub>2</sub> as internal standard. The resulting residue was purified by flash silica gel chromatography or preparative thin layer chromatography using petroleum ether/EtOAc (3:1-1:1) as the eluent to give the desired products.

### Large Scale Reaction Procedure:

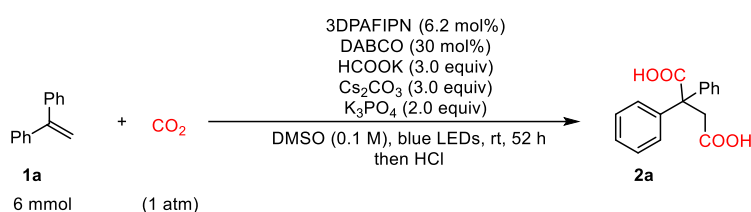

An oven-dried round-bottom flask (250 mL) containing a stirring bar was cooled to room temperature. The round-bottom flask was then introduced in a glovebox, where it was charged with K<sub>3</sub>PO<sub>4</sub> (2.0 equiv, 12.0 mmol, 2.55 g), Cs<sub>2</sub>CO<sub>3</sub> (3.0 equiv, 18.0 mmol, 5.86 g), HCOOK (3.0 equiv, 18.0 mmol, 1.51 g), 3DPAFIPN (6.2 mol%, 240 mg), DABCO (30 mol%, 202 mg). The flask was taken out of the glovebox. Subsequently, the degassed anhydrous DMSO (10 mL, 0.1 M) and 1,1-diphenylethylene (6.0 mmol, 1.0 equiv, 1.08 g) were added into the flask via syringe. Then the flask was evacuated and back-filled with CO<sub>2</sub> for 10 times. Then the reaction flask was attached with a CO<sub>2</sub> gas bag (about 3 L). Finally, the tube was placed under two 30 W blue LEDs (purchased from Shenzhen Xin Xing Yuan electronic technology Co. LTD. Of China;  $\lambda$  = 450 - 455 nm; 3.0 cm - 4.5 cm away from the LED with a fan to keep the reaction temperature at about 36 °C) light source and stirred at ambient temperature for 52 h. Then, the mixture was quenched with H<sub>2</sub>O and 10 mL of HCl (2 N), extracted with EtOAc three times. The resulting solution was concentrated by rotary evaporation. The residual was purified by column chromatography on silica gel to give the desired product in 85% yield (1.38 g).

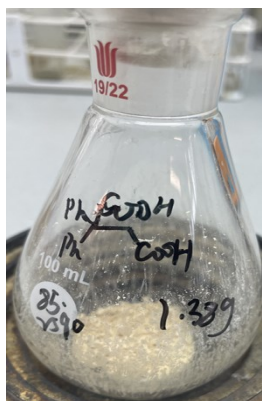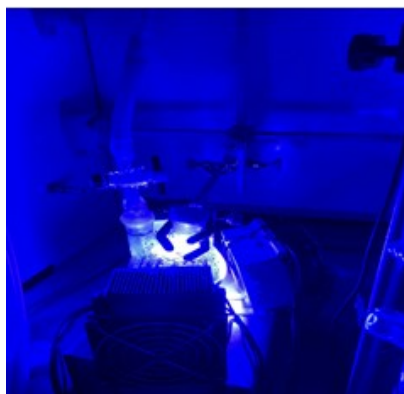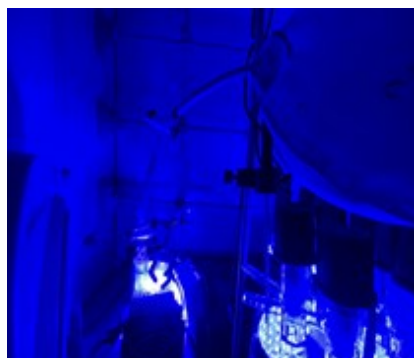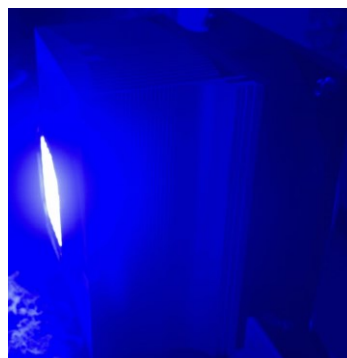

### Set-up the reaction outside the glovebox

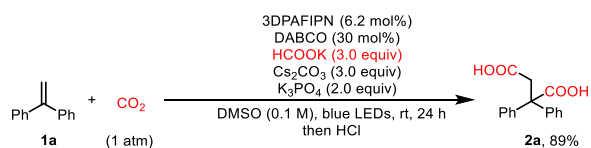

Take some  $\text{K}_3\text{PO}_4$ ,  $\text{Cs}_2\text{CO}_3$ ,  $\text{HCOOK}$ ,  $\text{DABCO}$  and  $\text{3DPAFIPN}$  from bottles kept in the glovebox and put them into vials respectively. Then weigh these chemicals using a balance outside the glovebox. To an oven-dried reaction tube containing a stirring bar cooled to room temperature was added  $\text{K}_3\text{PO}_4$  (2.0 equiv, 0.4 mmol, 85.5 mg),  $\text{Cs}_2\text{CO}_3$  (3.0 equiv, 0.6 mmol, 195.5 mg),  $\text{HCOOK}$  (3.0 equiv, 0.6 mmol, 50.5 mg),  $\text{3DPAFIPN}$  (6.2 mol%, 8.0 mg) and  $\text{DABCO}$  (30 mol%, 6.8 mg). Subsequently, the degassed anhydrous  $\text{DMSO}$  (2 mL, 0.1 M) and 1,1-diphenylethylene (1.0 equiv, 0.2 mmol, 36 mg) were added into the tube via syringe. Then the tube was evacuated and back-filled with  $\text{CO}_2$  for 10 times. Finally, the tube was placed under 30 W blue LEDs ( $\lambda = 450 - 455 \text{ nm}$ , 3.0 cm - 4.5 cm away from the LEDs, with fans to keep the reaction temperature at  $28^\circ\text{C}$ ) and stirred for 24 h. Then, the mixture was quenched with  $\text{H}_2\text{O}$  and 2 mL of  $\text{HCl}$  (2 N), extracted with  $\text{EtOAc}$  three times. The resulting

solution was concentrated by rotary evaporation. The residual was purified by column chromatography on silica gel to give the desired product **2a** in 89% yield (48.1 mg).

### 2,2-diphenylsuccinic acid (**2a**)<sup>2</sup>

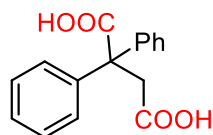

Product (**2a**) was obtained as a white solid (47.4 mg, 88%);  $R_f = 0.4$  (Petroleum ether : Acetone = 3 : 1);  $^1\text{H}$  NMR (400 MHz,  $\text{CD}_3\text{OD}$ )  $\delta$  7.35 - 7.32 (m, 4H), 7.27 - 7.18 (m, 6H), 3.50 (s, 2H).  $^{13}\text{C}$  NMR (100 MHz,  $\text{CD}_3\text{OD}$ )  $\delta$  176.6, 174.3, 144.4, 129.9, 128.8, 127.8, 58.5, 44.7.

### 2-phenyl-2-(*o*-tolyl)succinic acid (**2b**)<sup>2</sup>

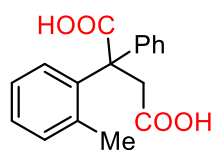

Product (**2b**) was obtained as a white solid (43.7 mg, 77%);  $R_f = 0.5$  (Petroleum ether : Acetone = 3 : 1);  $^1\text{H}$  NMR (400 MHz,  $\text{CD}_3\text{OD}$ )  $\delta$  7.51 - 7.47 (m, 1H), 7.40 - 7.37 (m, 2H), 7.26 - 7.15 (m, 5H), 7.09 - 7.07 (m, 1H), 3.62 (d,  $J = 15.6$  Hz, 1H), 3.41 (d,  $J = 15.6$  Hz, 1H), 1.86 (s, 3H).  $^{13}\text{C}$  NMR (100 MHz,  $\text{CD}_3\text{OD}$ )  $\delta$  176.1, 174.4, 143.7, 141.7, 138.9, 133.5, 130.0, 129.7, 128.8, 128.3, 127.7, 126.4, 58.7, 45.0, 22.0.

### 2-(2-fluorophenyl)-2-phenylsuccinic acid (**2c**)<sup>2</sup>

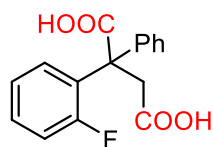

Product (**2c**) was obtained as a colorless oil (42 mg, 73%);  $R_f = 0.5$  (Petroleum ether : Acetone = 3 : 1);  $^1\text{H}$  NMR (400 MHz,  $\text{CD}_3\text{OD}$ )  $\delta$  7.45 - 7.24 (m, 7H), 7.09 - 6.97 (m, 2H), 3.58 (2H, ABq,  $J = 17.2$  Hz).  $^{13}\text{C}$  NMR (100 MHz,  $\text{CD}_3\text{OD}$ )  $\delta$  176.0, 174.2, 162.3 (d,  $J = 246$  Hz), 141.8, 132.5 (d,  $J = 3.6$  Hz), 131.4 (d,  $J = 10.8$  Hz), 130.2 (d,  $J = 9.0$  Hz), 129.2, 129.0, 128.2, 124.2 (d,  $J = 3.3$  Hz), 116.7 (d,  $J = 23.2$  Hz), 56.6,

41.6 (d,  $J = 3.0$  Hz).  $^{19}\text{F}$  NMR (376 MHz,  $\text{CD}_3\text{OD}$ )  $\delta$  -109.5.

### 2-phenyl-2-(*m*-tolyl)succinic acid (**2d**)

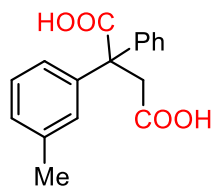

Product (**2d**) was obtained as a white solid (42 mg, 74%); mp: 151-152 °C;  $R_f = 0.5$  (Petroleum ether : Acetone = 3 : 1);  $^1\text{H}$  NMR (400 MHz,  $\text{CD}_3\text{OD}$ )  $\delta$  7.34 - 7.31 (m, 2H), 7.27 - 7.20 (m, 3H), 7.17 - 7.10 (m, 3H), 7.05 - 7.03 (m, 1H), 3.47 (2H, ABq,  $J = 16.8$  Hz), 2.27 (s, 3H).  $^{13}\text{C}$  NMR (100 MHz,  $\text{CD}_3\text{OD}$ )  $\delta$  176.7, 174.4, 144.5, 144.4, 138.4, 130.5, 130.0, 128.71, 128.68, 128.5, 127.8, 126.8, 58.4, 44.8, 21.6. HRMS (ESI)  $m/z$  calcd for  $\text{C}_{17}\text{H}_{15}\text{O}_4^-$  (M-H) $^-$  283.0976; found 283.0967.

### 2-phenyl-2-(3-(trifluoromethyl)phenyl)succinic acid (**2e**)<sup>2</sup>

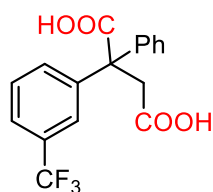

Product (**2e**) was obtained as a white solid (41 mg, 62%);  $R_f = 0.4$  (Petroleum ether : Acetone = 3 : 1);  $^1\text{H}$  NMR (400 MHz,  $\text{CD}_3\text{OD}$ )  $\delta$  7.52 (s, 1H), 7.35 - 7.29 (m, 2H), 7.24 - 7.20 (m, 1H), 7.15 - 7.03 (m, 5H), 3.46 (d,  $J = 16.4$  Hz, 1H), 3.19 (d,  $J = 16.8$  Hz, 1H).  $^{13}\text{C}$  NMR (100 MHz,  $\text{CD}_3\text{OD}$ )  $\delta$  176.0, 174.0, 145.9, 144.0, 134.2, 130.9 (q,  $J = 31.6$  Hz), 129.4, 129.31, 129.28, 128.4, 127.4 (q,  $J = 3.9$  Hz), 125.7 (q,  $J = 270$  Hz), 124.5 (q,  $J = 3.8$  Hz), 58.5, 44.5.  $^{19}\text{F}$  NMR (376 MHz,  $\text{CD}_3\text{OD}$ )  $\delta$  -64.0.

### 2-phenyl-2-(*p*-tolyl)succinic acid (**2f**)<sup>2</sup>

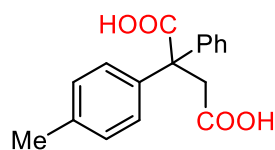

Product (**2f**) was obtained as a white solid (35 mg, 62%);  $R_f = 0.3$  (Petroleum ether :

Acetone = 3 : 1);  $^1\text{H}$  NMR (400 MHz,  $\text{CD}_3\text{OD}$ )  $\delta$  7.34 - 7.31 (m, 2H), 7.26 - 7.19 (m, 5H), 7.08 - 7.06 (m, 2H), 3.46 (2H, ABq,  $J$  = 16.4 Hz), 2.29 (s, 3H).  $^{13}\text{C}$  NMR (100 MHz,  $\text{CD}_3\text{OD}$ )  $\delta$  176.8, 174.4, 144.6, 141.5, 137.6, 129.9, 129.7, 129.4, 128.7, 127.7, 58.2, 44.8, 20.9.

### 2,2-di-*p*-tolylsuccinic acid (2g)

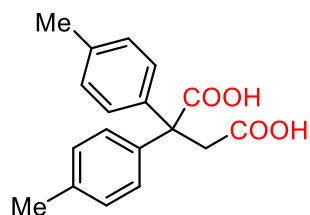

Product (**2g**) was obtained as a white solid (42 mg, 70%); mp: 117-118 °C;  $R_f$  = 0.5 (Petroleum ether : Acetone = 3 : 1);  $^1\text{H}$  NMR (400 MHz,  $\text{DMSO}-d_6$ )  $\delta$  12.43 (br, 2H), 7.16 - 7.14 (m, 4H), 7.07 - 7.05 (m, 4H), 3.34 (s, 2H), 2.25 (s, 6H).  $^{13}\text{C}$  NMR (100 MHz,  $\text{DMSO}-d_6$ )  $\delta$  174.2, 171.9, 140.6, 135.5, 128.4, 128.2, 56.0, 43.5, 20.5. HRMS (ESI)  $m/z$  calcd for  $\text{C}_{18}\text{H}_{17}\text{O}_4^-$  (M-H) $^-$  297.1132; found 297.1122.

### 2-(4-methoxyphenyl)-2-phenylsuccinic acid (2h)<sup>2</sup>

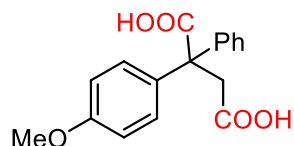

Product (**2h**) was obtained as a white solid (45 mg, 75%);  $R_f$  = 0.5 (Petroleum ether : Acetone = 3 : 1);  $^1\text{H}$  NMR (400 MHz,  $\text{CD}_3\text{OD}$ )  $\delta$  7.34 - 7.32 (m, 2H), 7.27 - 7.18 (m, 5H), 6.82 - 6.79 (m, 2H), 3.75 (s, 3H), 3.46 (2H, ABq,  $J$  = 16.4 Hz).  $^{13}\text{C}$  NMR (100 MHz,  $\text{CD}_3\text{OD}$ )  $\delta$  176.9, 174.4, 159.8, 144.7, 136.4, 131.0, 129.9, 128.7, 127.8, 114.1, 57.9, 55.6, 44.9.

### 2,2-bis(4-methoxyphenyl)succinic acid (2i)

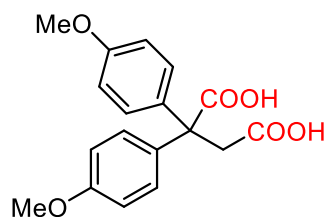

Product **(2i)** was obtained as a colorless oil (48 mg, 74%);  $R_f = 0.5$  (Petroleum ether : Acetone = 3 : 1);  $^1\text{H}$  NMR (400 MHz,  $\text{CD}_3\text{OD}$ )  $\delta$  7.25 - 7.22 (m, 4H), 6.83 - 6.79 (m, 4H), 3.77 (s, 6H), 3.41 (s, 2H).  $^{13}\text{C}$  NMR (100 MHz,  $\text{CD}_3\text{OD}$ )  $\delta$  177.2, 174.5, 159.8, 136.7, 131.0, 114.0, 57.3, 55.6, 45.1. HRMS (ESI)  $m/z$  calcd for  $\text{C}_{18}\text{H}_{17}\text{O}_6^-$  (M-H) $^-$  329.1031; found 329.1018.

### 2-(4-fluorophenyl)-2-phenylsuccinic acid (**2j**)<sup>2</sup>

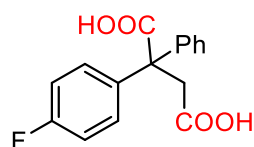

Product **(2j)** was obtained as a white solid (45 mg, 78%);  $R_f = 0.5$  (Petroleum ether : Acetone = 3 : 1);  $^1\text{H}$  NMR (400 MHz,  $\text{CD}_3\text{OD}$ )  $\delta$  7.38 - 7.32 (m, 4H), 7.30 - 7.20 (m, 3H), 7.00 - 6.94 (m, 2H), 3.55 (d,  $J = 16.4$  Hz, 1H), 3.42 (d,  $J = 16.4$  Hz, 1H).  $^{13}\text{C}$  NMR (100 MHz,  $\text{CD}_3\text{OD}$ )  $\delta$  176.4, 174.2, 162.9 (d,  $J = 243.5$  Hz), 144.4, 140.5 (d,  $J = 3.4$  Hz), 132.1 (d,  $J = 7.9$  Hz), 129.6, 129.0, 128.0, 115.2 (d,  $J = 21.3$  Hz), 58.0, 44.7.  $^{19}\text{F}$  NMR (376 MHz,  $\text{CD}_3\text{OD}$ )  $\delta$  -118.3.

### 2-(3,4-dimethoxyphenyl)-2-phenylsuccinic acid (**2k**)

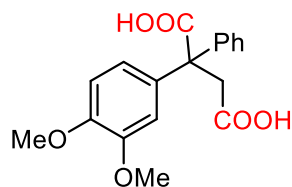

Product **(2k)** was obtained as a colorless oil (29.8 mg, 72%);  $R_f = 0.5$  (Petroleum ether : Acetone = 3 : 1);  $^1\text{H}$  NMR (400 MHz,  $\text{CD}_3\text{OD}$ )  $\delta$  7.36 - 7.34 (m, 2H), 7.28 - 7.19 (m, 3H), 6.97 (s, 1H), 6.88 - 6.82 (m, 2H), 3.80 (s, 3H), 3.69 (s, 3H), 3.47 (s, 2H).  $^{13}\text{C}$  NMR (100 MHz,  $\text{CD}_3\text{OD}$ )  $\delta$  176.8, 174.3, 149.6, 149.5, 144.6, 137.2, 129.9,

128.8, 127.8, 122.4, 114.9, 112.1, 58.2, 56.4, 44.9. HRMS (ESI)  $m/z$  calcd for  $C_{18}H_{17}O_6^-$  (M-H) $^-$  329.1031; found 329.1018.

### 2-phenyl-2-(thiophen-3-yl)succinic acid (**2l**)<sup>2</sup>

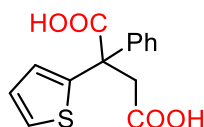

Product (**2l**) was obtained as a white solid (30 mg, 55%);  $R_f$  = 0.5 (Petroleum ether : Acetone = 3 : 1);  $^1H$  NMR (400 MHz,  $CD_3OD$ )  $\delta$  7.37 - 7.34 (m, 2H), 7.29 - 7.21 (m, 4H), 7.03 - 7.00 (m, 1H), 6.92 - 6.90 (m, 1H), 3.66 (d,  $J$  = 16.8 Hz, 1H), 3.47 (d,  $J$  = 16.8 Hz, 1H).  $^{13}C$  NMR (100 MHz,  $CD_3OD$ )  $\delta$  175.9, 173.9, 147.5, 144.4, 129.1, 128.4, 128.3, 127.6, 126.7, 126.3, 56.0, 45.6.

### 2-(benzofuran-2-yl)-2-phenylsuccinic acid(**2m**)<sup>2</sup>

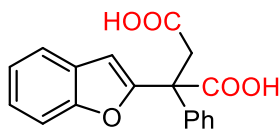

Product (**2m**) was obtained as a white solid (16 mg, 51.6%);  $R_f$  = 0.3 (Petroleum ether : acetone = 3 : 1);  $^1H$  NMR (500 MHz,  $CD_3OD$ )  $\delta$  7.97 (d,  $J$  = 7.0 Hz, 1H), 7.52 (d,  $J$  = 8.0 Hz, 1H), 7.44 (d,  $J$  = 8.0 Hz, 2H), 7.32 - 7.27 (m, 4H), 7.22 - 7.14 (m, 1H), 5.66 - 5.63 (m, 1H), 3.28 (d,  $J$  = 9.0 Hz, 1H), 3.11 (dd,  $J$  = 16.0, 7.0 Hz, 1H).  $^{13}C$  NMR (126 MHz,  $CD_3OD$ )  $\delta$  174.7, 166.9, 155.2, 141.8, 129.7, 128.9, 128.2, 127.6, 125.8, 125.0, 123.2, 111.9, 110.0, 41.3, 39.1.

### dimethyl 2-methyl-2-(pyridin-3-yl)succinate (**2n**)

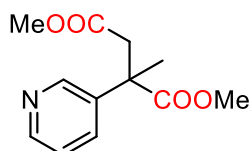

Product (**2n**) was obtained as a yellow oil (18 mg, 38%);  $R_f$  = 0.5 (Petroleum ether : ethyl acetate = 1 : 1);  $^1H$  NMR (500 MHz,  $CDCl_3$ , TMS)  $\delta$  8.62 (s, 1H), 8.52 (d,  $J$  = 5.0 Hz, 1H), 7.67 (d,  $J$  = 8.0 Hz, 1H), 7.29 - 7.26 (m, 1H), 3.72 (s, 3H), 3.68 (s, 3H),

3.25 (d,  $J = 16.0$  Hz, 1H), 2.88 (d,  $J = 16.5$  Hz, 1H), 1.74 (s, 3H).  $^{13}\text{C}$  NMR (126 MHz,  $\text{CDCl}_3$ )  $\delta$  174.7, 171.1, 148.7, 147.7, 138.0, 133.8, 123.4, 52.8, 51.9, 47.1, 43.24, 23.2. HRMS (ESI)  $m/z$  calcd for  $\text{C}_{12}\text{H}_{15}\text{NO}_4\text{Na}^+$  ( $\text{M}+\text{Na}$ ) $^+$  260.0901; found 260.0899.

### 2-butyl-2-phenylsuccinic acid (**2o**)<sup>3</sup>

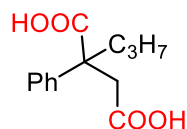

Product (**2o**) was obtained as a white solid (31 mg, 63%);  $R_f = 0.5$  (Petroleum ether : Acetone = 3 : 1);  $^1\text{H}$  NMR (400 MHz,  $\text{CD}_3\text{OD}$ )  $\delta$  7.37 - 7.30 (m, 4H), 7.25 - 7.21 (m, 1H), 3.20 (d,  $J = 16.0$  Hz, 1H), 3.02 (d,  $J = 16.0$  Hz, 1H), 2.24 - 2.09 (m, 2H), 1.20 - 1.01 (m, 2H), 0.87 (t,  $J = 7.2$  Hz, 3H).  $^{13}\text{C}$  NMR (100 MHz,  $\text{CD}_3\text{OD}$ )  $\delta$  178.6, 174.7, 143.2, 129.4, 127.9, 127.4, 52.8, 40.0, 38.9, 18.6, 14.8.

### 2-methyl-2-phenylsuccinic acid (**2p**)<sup>2</sup>

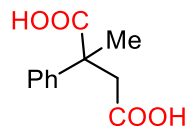

Product (**2p**) was obtained as a white solid (25 mg, 60%);  $R_f = 0.5$  (Petroleum ether : Acetone = 3 : 1);  $^1\text{H}$  NMR (400 MHz,  $\text{CD}_3\text{OD}$ )  $\delta$  7.42 - 7.40 (m, 2H), 7.35 - 7.31 (m, 2H), 7.26 - 7.22 (m, 1H), 3.21 (d,  $J = 16.4$  Hz, 1H), 2.82 (d,  $J = 16.4$  Hz, 1H), 1.69 (s, 3H).  $^{13}\text{C}$  NMR (100 MHz,  $\text{CD}_3\text{OD}$ )  $\delta$  178.8, 174.7, 144.7, 129.5, 128.0, 126.8, 49.2, 44.3, 24.0.

### 2-(3-cyanophenyl)-2-methylsuccinic acid (**2q**)

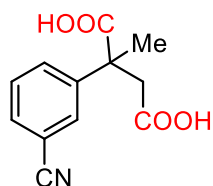

Product (**2q**) was obtained as a white solid (31 mg, 68%); mp: 140-141 °C;  $R_f = 0.4$

(Petroleum ether : Acetone = 3 : 1);  $^1\text{H}$  NMR (400 MHz,  $\text{CD}_3\text{OD}$ )  $\delta$  7.78 - 7.74 (m, 2H), 7.64 - 7.62 (m, 1H), 7.54 - 7.50 (m, 1H), 3.15 (d,  $J$  = 16.8 Hz, 1H), 2.93 (d,  $J$  = 16.8 Hz, 1H), 1.72 (s, 3H).  $^{13}\text{C}$  NMR (100 MHz,  $\text{CD}_3\text{OD}$ )  $\delta$  177.7, 174.1, 146.3, 132.2, 131.8, 131.0, 130.6, 119.7, 113.5, 44.0, 23.8. HRMS (ESI)  $m/z$  calcd for  $\text{C}_{12}\text{H}_{10}\text{NO}_4^-$  ( $\text{M}-\text{H}$ ) $^-$  232.0615; found 232.0605.

### 3-methyl-2,2-diphenylsuccinic acid (**2r**)

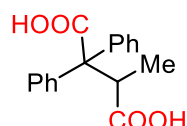

Product (**2r**) was obtained as a white solid (30 mg, 53%); mp: 138-139 °C;  $R_f$  = 0.4 (Petroleum ether : Acetone = 2 : 1);  $^1\text{H}$  NMR (400 MHz,  $\text{CD}_3\text{OD}$ )  $\delta$  7.40 - 7.22 (m, 10H), 4.15 (q,  $J$  = 7.2 Hz, 1H), 1.12 (d,  $J$  = 7.2 Hz, 3H).  $^{13}\text{C}$  NMR (100 MHz,  $\text{CD}_3\text{OD}$ )  $\delta$  177.8, 177.3, 143.0, 141.7, 132.5, 130.7, 128.8, 128.1, 127.8, 127.7, 63.5, 45.2, 15.2. HRMS (ESI)  $m/z$  calcd for  $\text{C}_{17}\text{H}_{16}\text{O}_4\text{Na}^+$  ( $\text{M}+\text{Na}$ ) $^+$  307.0941; found 307.0942.

### 2-(2,2-diphenylvinyl)succinic acid (**2sa**)

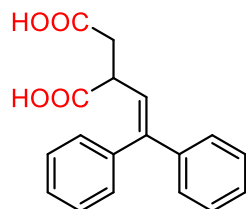

Product (**2sa**) was obtained as a white solid (22 mg, 37%); mp: 172-173 °C;  $R_f$  = 0.3 (Petroleum ether : Acetone = 2 : 1);  $^1\text{H}$  NMR (400 MHz,  $\text{CD}_3\text{OD}$ )  $\delta$  7.43 - 7.33 (m, 3H), 7.28 - 7.18 (m, 7H), 6.04 (d,  $J$  = 10.8 Hz, 1H), 3.59 - 3.53 (m, 1H), 2.81 - 2.75 (m, 1H), 2.54 - 2.49 (m, 1H).  $^{13}\text{C}$  NMR (100 MHz,  $\text{CD}_3\text{OD}$ )  $\delta$  176.7, 174.9, 146.5, 143.3, 140.6, 130.9, 129.4, 129.2, 128.6, 128.4, 126.1, 43.7, 37.9. HRMS (ESI)  $m/z$  calcd for  $\text{C}_{18}\text{H}_{16}\text{O}_4\text{Na}^+$  ( $\text{M}+\text{Na}$ ) $^+$  319.0941; found 319.0942.

### (*E*)-2,2-diphenylhex-3-enedioic acid (**2sb**)

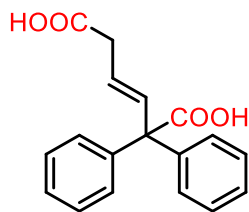

Product (**2sb**) was obtained as a white solid (10 mg, 17%); mp: 155-156 °C;  $R_f$  = 0.4 (Petroleum ether : Acetone = 2 : 1);  $^1\text{H}$  NMR (400 MHz,  $\text{CD}_3\text{OD}$ )  $\delta$  7.32 - 7.24 (m, 6H), 7.20 - 7.18 (m, 4H), 6.58 (d,  $J$  = 15.8 Hz, 1H), 5.07 - 5.00 (m, 1H), 3.13 (dd,  $J$  = 7.0, 0.8 Hz, 2H).  $^{13}\text{C}$  NMR (100 MHz,  $\text{CD}_3\text{OD}$ )  $\delta$  177.2, 175.4, 143.1, 138.8, 130.6, 128.8, 128.1, 127.1, 65.2, 38.8. HRMS (ESI)  $m/z$  calcd for  $\text{C}_{18}\text{H}_{15}\text{O}_4^-$  (M-H) $^-$  295.0976; found 295.0961.

#### 2-((tert-butoxycarbonyl)-2-methylsuccinic acid (**2t**)<sup>2</sup>

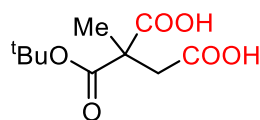

Product (**2t**) was obtained as a white solid (35 mg, 76%);  $R_f$  = 0.5 (Petroleum ether : Acetone = 3 : 1);  $^1\text{H}$  NMR (400 MHz,  $\text{CDCl}_3$ , TMS)  $\delta$  3.01 (2H, ABq,  $J$  = 17.2 Hz), 1.54 (s, 3H), 1.46 (s, 9H).  $^{13}\text{C}$  NMR (100 MHz,  $\text{CDCl}_3$ )  $\delta$  176.8, 175.6, 172.0, 83.9, 51.2, 40.1, 27.6, 21.9.

#### 2-((cyclohexyloxy)carbonyl)-2-methylsuccinic acid (**2u**)<sup>2</sup>

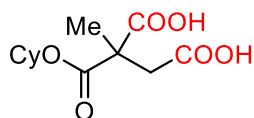

Product (**2u**) was obtained as a white solid (42 mg, 82%);  $R_f$  = 0.3 (Petroleum ether : Acetone = 3 : 1);  $^1\text{H}$  NMR (400 MHz,  $\text{CD}_3\text{OD}$ )  $\delta$  4.84 - 4.78 (m, 1H), 2.97 (d,  $J$  = 16.8 Hz, 1H), 2.83 (d,  $J$  = 17.2 Hz, 1H), 1.80 - 1.70 (m, 4H), 1.53 - 1.44 (m, 6H), 1.42 - 1.29 (m, 3H).  $^{13}\text{C}$  NMR (100 MHz,  $\text{CD}_3\text{OD}$ )  $\delta$  174.6, 173.9, 172.4, 74.7, 52.8, 40.9, 32.0, 26.5, 24.2, 20.8.

#### 2-benzyl-2-(methoxycarbonyl)succinic acid (**2v**)

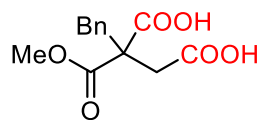

Product (**2v**) was obtained as a white solid (21 mg, 40%); mp: 134-135 °C;  $R_f$  = 0.4 (Petroleum ether : Acetone = 3 : 1);  $^1\text{H}$  NMR (400 MHz,  $\text{CD}_3\text{OD}$ )  $\delta$  7.29 - 7.21 (m, 3H), 7.12 - 7.10 (m, 2H), 3.73 (s, 3H), 3.38 (dd,  $J$  = 31.6, 14.0 Hz, 2H), 2.76 (dd,  $J$  = 44.0, 17.6 Hz, 2H).  $^{13}\text{C}$  NMR (100 MHz,  $\text{CD}_3\text{OD}$ )  $\delta$  174.1, 172.9, 172.5, 137.4, 131.1, 129.4, 128.2, 57.7, 53.1, 39.5, 37.3. HRMS (ESI)  $m/z$  calcd for  $\text{C}_{13}\text{H}_{13}\text{O}_6^-$  ( $\text{M-H}^-$ ) 265.0718; found 265.0708.

### 2-phenylsuccinic acid (**4a**)<sup>2</sup>

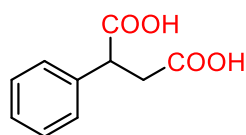

Product (**4a**) was obtained as a white solid (28 mg, 72%);  $R_f$  = 0.3 (Petroleum ether : Acetone = 2 : 1);  $^1\text{H}$  NMR (400 MHz,  $\text{CD}_3\text{OD}$ )  $\delta$  7.35 - 7.25 (m, 5H), 4.01 (dd,  $J$  = 10.0, 5.2 Hz, 1H), 3.10 (dd,  $J$  = 16.8, 10.4 Hz, 1H), 2.62 (dd,  $J$  = 16.8, 5.2 Hz, 1H).  $^{13}\text{C}$  NMR (100 MHz,  $\text{CD}_3\text{OD}$ )  $\delta$  176.6, 175.2, 139.9, 129.8, 128.9, 128.5, 48.7, 38.7.

### 2-(*o*-tolyl)succinic acid (**4b**)<sup>2</sup>

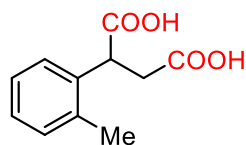

Product (**4b**) was obtained as a white solid (30 mg, 72%);  $R_f$  = 0.5 (Petroleum ether : Acetone = 3 : 1);  $^1\text{H}$  NMR (400 MHz,  $\text{CD}_3\text{OD}$ )  $\delta$  7.23 - 7.11(m, 4H), 4.32 (dd,  $J$  = 10.0, 5.2 Hz, 1H), 3.08 (dd,  $J$  = 17.2, 10.0 Hz, 1H), 2.57 (dd,  $J$  = 16.8, 5.2 Hz, 1H), 2.42 (s, 3H).  $^{13}\text{C}$  NMR (100 MHz,  $\text{CD}_3\text{OD}$ )  $\delta$  176.8, 175.4, 138.3, 137.4, 131.7, 128.3, 127.6, 127.4, 44.2, 38.1, 19.8.

### 2-(2-methoxyphenyl)succinic acid (**4c**)

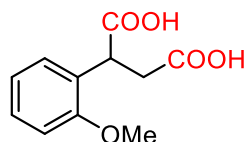

Product **(4c)** was obtained as a white solid (35 mg, 78%) (42 mg, 94%, note: the reaction temperature is 40 to 45°C); mp: 177-178 °C;  $R_f$  = 0.5 (Petroleum ether : Acetone = 3 : 1);  $^1\text{H}$  NMR (400 MHz,  $\text{CD}_3\text{OD}$ )  $\delta$  7.27 - 7.23 (m, 1H), 7.18 - 7.16 (m, 1H), 6.98 - 6.96 (m, 1H), 6.92 - 6.88 (m, 1H), 4.35 (dd,  $J$  = 9.6, 5.2 Hz, 1H), 3.83 (s, 3H), 3.01 (dd,  $J$  = 16.8, 9.6 Hz, 1H), 2.52 (dd,  $J$  = 16.8, 5.2 Hz, 1H).  $^{13}\text{C}$  NMR (100 MHz,  $\text{CD}_3\text{OD}$ )  $\delta$  177.0, 175.7, 158.3, 129.8, 128.4, 121.7, 112.1, 56.0, 43.2, 37.5. HRMS (ESI)  $m/z$  calcd for  $\text{C}_{11}\text{H}_{11}\text{O}_5^-$  (M-H) $^-$  223.0612; found 223.0602.

#### 2-(2-chlorophenyl)succinic acid (**4d**)<sup>4</sup>

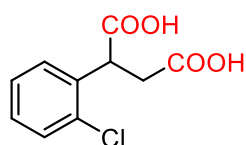

Product **(4d)** was obtained as a white solid (22 mg, 48%);  $R_f$  = 0.5 (Petroleum ether : Acetone = 3 : 1);  $^1\text{H}$  NMR (400 MHz,  $\text{CD}_3\text{OD}$ )  $\delta$  7.44 - 7.41 (m, 1H), 7.35 - 7.24 (m, 3H), 4.56 (dd,  $J$  = 10.0, 5.2 Hz, 1H), 3.05 (dd,  $J$  = 17.2, 10.0 Hz, 1H), 2.61 (dd,  $J$  = 16.8, 4.8 Hz, 1H).  $^{13}\text{C}$  NMR (100 MHz,  $\text{CD}_3\text{OD}$ )  $\delta$  175.7, 174.9, 137.7, 134.9, 130.9, 130.1, 130.0, 128.5, 45.4, 37.6.

#### 2-(3-methoxyphenyl)succinic acid (**4e**)<sup>5</sup>

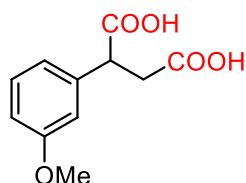

Product **(4e)** was obtained as a white solid (35 mg, 78%);  $R_f$  = 0.5 (Petroleum ether : Acetone = 3 : 1);  $^1\text{H}$  NMR (400 MHz,  $\text{CD}_3\text{OD}$ )  $\delta$  7.25 - 7.21 (m, 1H), 6.89 - 6.81 (m, 3H), 3.99 (dd,  $J$  = 10.0, 5.2 Hz, 1H), 3.77 (s, 3H), 3.09 (dd,  $J$  = 16.8, 10.0 Hz, 1H), 2.62 (dd,  $J$  = 16.8, 5.2 Hz, 1H).  $^{13}\text{C}$  NMR (100 MHz,  $\text{CD}_3\text{OD}$ )  $\delta$  176.5, 175.2, 161.3,

141.2, 130.8, 121.0, 114.6, 113.9, 55.6, 48.6, 38.7.

### 2-(3-chlorophenyl)succinic acid (4f)<sup>2</sup>

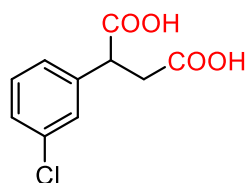

Product (**4f**) was obtained as a white solid (33 mg, 73%);  $R_f = 0.5$  (Petroleum ether : Acetone = 3 : 1);  $^1\text{H}$  NMR (400 MHz,  $\text{CD}_3\text{OD}$ )  $\delta$  7.35 - 7.24 (m, 4H), 4.02 (dd,  $J = 10.0, 5.6$  Hz, 1H), 3.09 (dd,  $J = 16.8, 9.6$  Hz, 1H), 2.65 (dd,  $J = 16.8, 5.6$  Hz, 1H).  $^{13}\text{C}$  NMR (100 MHz,  $\text{CD}_3\text{OD}$ )  $\delta$  175.9, 174.8, 142.1, 135.5, 131.3, 129.1, 128.6, 127.4, 48.3, 38.4.

### 2-(3-cyanophenyl)succinic acid (4g)

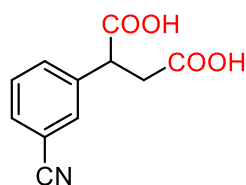

Product (**4g**) was obtained as a white solid (31 mg, 71%); mp: 180-181 °C;  $R_f = 0.3$  (Petroleum ether : Acetone = 3 : 1);  $^1\text{H}$  NMR (400 MHz,  $\text{CD}_3\text{OD}$ )  $\delta$  7.70 - 7.63 (m, 3H), 7.53 - 7.49 (m, 1H), 4.11 (dd,  $J = 9.2, 5.6$  Hz, 1H), 3.12 (dd,  $J = 17.2, 9.6$  Hz, 1H), 2.69 (dd,  $J = 16.8, 5.6$  Hz, 1H).  $^{13}\text{C}$  NMR (100 MHz,  $\text{CD}_3\text{OD}$ )  $\delta$  175.5, 174.7, 141.6, 133.9, 132.8, 132.3, 130.9, 119.5, 113.7, 48.4, 38.2. HRMS (ESI)  $m/z$  calcd for  $\text{C}_{11}\text{H}_8\text{NO}_4^-$  (M-H) $^-$  218.0459; found 218.0446.

### 2-(*p*-tolyl)succinic acid (4h)<sup>2</sup>

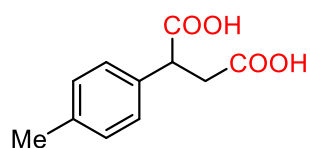

Product (**4h**) was obtained as a white solid (25 mg, 62%);  $R_f = 0.4$  (Petroleum ether : Acetone = 3 : 1);  $^1\text{H}$  NMR (400 MHz,  $\text{CD}_3\text{OD}$ )  $\delta$  7.20 - 7.12 (m, 4H), 3.97 (dd,  $J =$

10.0, 5.2 Hz, 1H), 3.08 (dd,  $J = 17.2, 10.4$  Hz, 1H), 2.59 (dd,  $J = 16.8, 5.2$  Hz, 1H), 2.30 (s, 3H).  $^{13}\text{C}$  NMR (100 MHz,  $\text{CD}_3\text{OD}$ )  $\delta$  176.8, 175.2, 138.3, 136.8, 130.4, 128.7, 48.2, 38.8, 21.1.

#### 2-(4-methoxyphenyl)succinic acid (**4i**)<sup>6</sup>

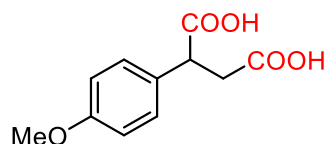

Product (**4i**) was obtained as a white solid (25 mg, 56%);  $R_f = 0.5$  (Petroleum ether : Acetone = 3 : 1);  $^1\text{H}$  NMR (400 MHz,  $\text{CD}_3\text{OD}$ )  $\delta$  7.24 - 7.21 (m, 2H), 6.89 - 6.85 (m, 2H), 3.95 (dd,  $J = 10.0, 5.2$  Hz, 1H), 3.76 (s, 3H), 3.07 (dd,  $J = 17.2, 10.0$  Hz, 1H), 2.59 (dd,  $J = 17.2, 5.2$  Hz, 1H).  $^{13}\text{C}$  NMR (100 MHz,  $\text{CD}_3\text{OD}$ )  $\delta$  176.9, 175.3, 160.5, 131.7, 129.9, 115.1, 55.7, 47.8, 38.8.

#### 2-(4-fluorophenyl)succinic acid (**4j**)<sup>2</sup>

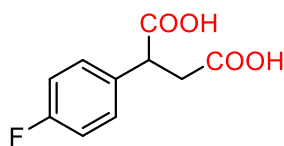

Product (**4j**) was obtained as a white solid (25.5 mg, 60%);  $R_f = 0.3$  (Petroleum ether : Acetone = 3 : 1);  $^1\text{H}$  NMR (400 MHz,  $\text{DMSO}-d_6$ )  $\delta$  12.39 (br, 2H), 7.35 - 7.31 (m, 2H), 7.17 - 7.13 (m, 2H), 3.91 (dd,  $J = 10.0, 5.2$  Hz, 1H), 2.94 (dd,  $J = 17.2, 10.4$  Hz, 1H), 2.57 - 2.53 (m, 1H).  $^{13}\text{C}$  NMR (100 MHz,  $\text{DMSO}-d_6$ )  $\delta$  174.0, 172.6, 161.4 (d,  $J = 242$  Hz), 134.9 (d,  $J = 3.0$  Hz), 129.8 (d,  $J = 8.1$  Hz), 115.4 (d,  $J = 21.1$  Hz), 46.1, 37.4.  $^{19}\text{F}$  NMR (376 MHz,  $\text{DMSO}$ )  $\delta$  -115.6.

#### 2-(4-cyanophenyl)succinic acid (**4k**)<sup>2</sup>

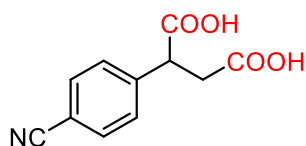

Product (**4k**) was obtained as a white solid (28 mg, 65%);  $R_f = 0.4$  (Petroleum ether : Acetone = 3 : 1);  $^1\text{H}$  NMR (400 MHz,  $\text{CD}_3\text{OD}$ )  $\delta$  7.71 - 7.69 (m, 2H), 7.54 - 7.52 (m,

2H), 4.15 - 4.11 (m, 1H), 3.16 - 3.10 (m, 1H), 2.72 - 2.66 (m, 1H).  $^{13}\text{C}$  NMR (100 MHz,  $\text{CD}_3\text{OD}$ )  $\delta$  175.3, 174.6, 145.5, 133.6, 130.2, 119.5, 112.3, 48.6, 48.4.

### 2-([1,1'-biphenyl]-4-yl)succinic acid (**4l**)<sup>2</sup>

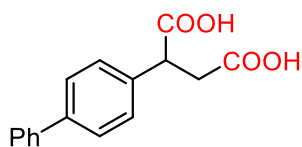

Product (**4l**) was obtained as a white solid (36 mg, 66%);  $R_f$  = 0.5 (Petroleum ether : acetone = 3 : 1);  $^1\text{H}$  NMR (400 MHz,  $\text{CD}_3\text{OD}$ )  $\delta$  7.60 - 7.57 (m, 4H), 7.43 - 7.39 (m, 4H), 7.34 - 7.30 (m, 1H), 4.07 (dd,  $J$  = 10.0, 5.2 Hz, 1H), 3.14 (dd,  $J$  = 16.8, 10.0 Hz, 1H), 2.67 (dd,  $J$  = 16.8, 5.2 Hz, 1H).  $^{13}\text{C}$  NMR (100 MHz,  $\text{CD}_3\text{OD}$ )  $\delta$  176.6, 175.2, 141.9, 141.7, 138.9, 129.9, 129.4, 128.4, 128.3, 127.9, 48.3, 38.7.

### dimethyl 2-(pyridin-3-yl)succinate (**4m**)<sup>7</sup>

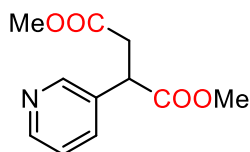

Product (**4m**) was obtained as a yellow oil (18 mg, 40%);  $R_f$  = 0.5 (Petroleum ether : ethyl acetate = 1 : 1);  $^1\text{H}$  NMR (500 MHz,  $\text{CDCl}_3$ , TMS)  $\delta$  8.56 - 8.54 (m, 2H), 7.64 - 7.61 (m, 1H), 7.29 - 7.26 (m, 1H), 4.13 (dd,  $J$  = 9.5, 6.0 Hz, 1H), 3.69 (d,  $J$  = 9.5 Hz, 6H), 3.22 (dd,  $J$  = 17.0, 9.5 Hz, 1H), 2.71 (dd,  $J$  = 17.0, 6.0 Hz, 1H).  $^{13}\text{C}$  NMR (126 MHz,  $\text{CDCl}_3$ )  $\delta$  172.8, 171.6, 149.6, 149.3, 135.2, 133.5, 123.8, 52.7, 52.2, 44.8, 37.3.

### 2-(benzo[b]thiophen-2-yl)succinic acid (**4n**)<sup>2</sup>

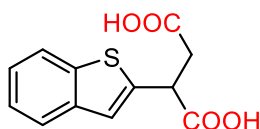

Product (**4n**) was obtained as a colourless oil (16 mg, 32%);  $R_f$  = 0.5 (Petroleum ether : acetone = 3 : 1);  $^1\text{H}$  NMR (400 MHz,  $\text{CD}_3\text{OD}$ )  $\delta$  7.83 - 7.71 (m, 2H), 7.36 - 7.22 (m, 3H), 4.39 (dd,  $J$  = 10.0, 5.2 Hz, 1H), 3.21 (dd,  $J$  = 16.8, 9.6 Hz, 1H), 2.87 (dd,  $J$  = 16.8, 5.2 Hz, 1H).  $^{13}\text{C}$  NMR (126 MHz,  $\text{CD}_3\text{OD}$ )  $\delta$  175.4, 174.7, 142.8, 141.0,

140.8, 125.4, 125.3, 124.4, 123.4, 123.1, 44.9, 39.0. HRMS (ESI)  $m/z$  calcd for  $C_{12}H_9SO_4^-$  (M-H) $^-$  249.0224; found 249.0222.

## 4. Mechanistic Experiments and Product Application

### Radical clock experiment

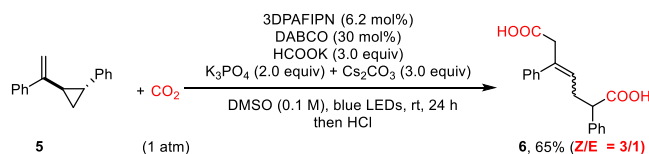

4-(2-(1-phenylvinyl)cyclopropyl)-1,1'-biphenyl was synthesized following the literature procedures<sup>8</sup>. An oven-dried Schlenk tube (25 mL) containing a stirring bar was cooled to room temperature. The Schlenk tube was then introduced in a glovebox, where it was charged with  $K_3PO_4$  (85.5 mg, 0.4 mmol, 2.0 equiv),  $Cs_2CO_3$  (195.5 mg, 0.6 mmol, 3.0 equiv), HCOOK (50.5 mg, 0.6 mmol, 3.0 equiv), 3DPAFIPN (8.0 mg, 6.2 mol%), DABCO (6.8 mg, 30 mol%). The tube was taken out of the glovebox. Subsequently, the degassed anhydrous DMSO (2 mL, 0.1 M) and the 4-(2-(1-phenylvinyl)cyclopropyl)-1,1'-biphenyl (44.1 mg, 0.2 mmol) were added into the tube via syringe. Then the tube was evacuated and back-filled with  $CO_2$  for 10 times. Finally, the tube was placed under 30 W blue LEDs ( $\lambda = 450 - 455$  nm, 3.0 cm - 4.5 cm away from the LEDs, with fans to keep the reaction temperature at 25 - 33 °C) light source and stirred for 24 h. Then, the mixture was quenched with  $H_2O$  and 2 mL of HCl (2 N), extracted with EtOAc three times. The resulting solution was concentrated by rotary evaporation. The residual was purified by column chromatography on silica gel to give the desired product **6** as a colorless oil;  $R_f = 0.4$  (Petroleum ether : ethyl acetate = 1 : 1);  $^1H$  NMR (400 MHz,  $CD_3OD$ )  $\delta$  7.39 - 7.17 (m, 11.5H), 7.10 - 7.08 (m, 2H), 5.84 (t,  $J = 7.4$  Hz, 0.33H), 5.58 (t,  $J = 7.3$  Hz, 1H), 3.76 (t,  $J = 7.7$  Hz, 0.34H), 3.57 (t,  $J = 7.6$  Hz, 1H), 3.48 (0.71H, ABq,  $J = 16.0$  Hz), 3.25 (s, 1.9H), 3.01 - 2.94 (m, 0.33H), 2.72 - 2.64 (m, 1.34H), 2.48 - 2.41 (m, 1H).  $^{13}C$  NMR (100 MHz,  $CD_3OD$ )  $\delta$  177.1, 177.1, 175.2, 175.1, 143.6, 140.9, 140.5, 140.2, 137.6, 136.1, 129.8, 129.6, 129.5, 129.5, 129.4, 129.2, 129.1, 129.1, 128.3, 128.2,

128.1, 128.0, 127.0, 52.9, 52.6, 36.7, 34.0. HRMS (ESI)  $m/z$  calcd for  $C_{19}H_{18}NaO_4^+$  ( $M+Na$ ) $^+$  333.1097; found 333.1096.

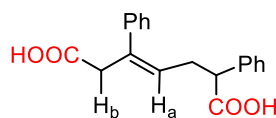

## 1D selective NOE

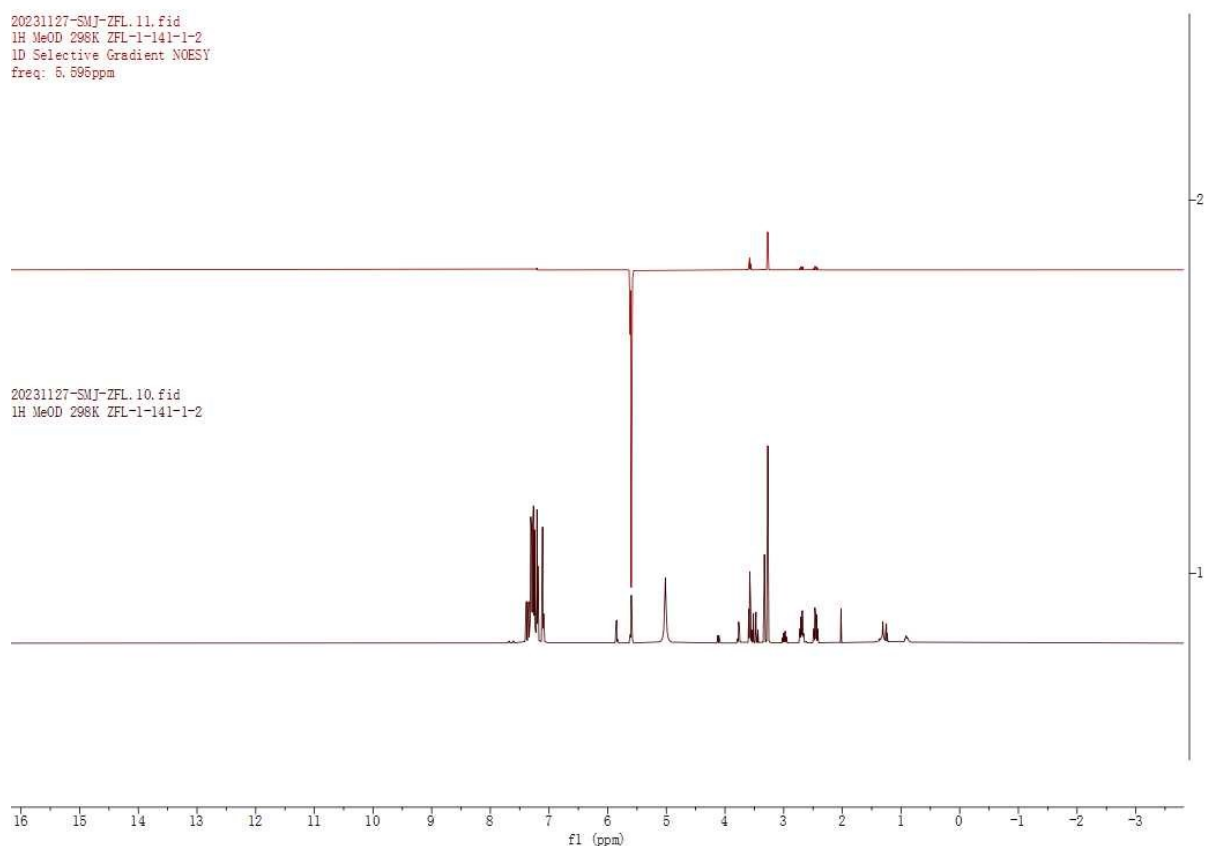

**Figure S1.** 1D selective NOE of **6**.

## Reactions in the presence of $D_2O$

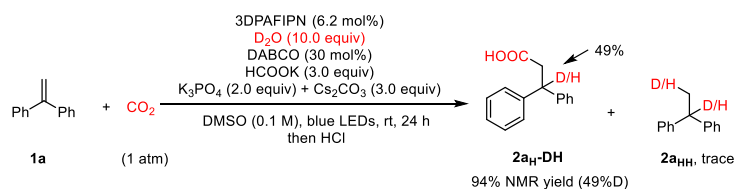

An oven-dried Schlenk tube (25 mL) containing a stirring bar was cooled to room temperature. The Schlenk tube was then introduced in a glovebox, where it was

charged with K<sub>3</sub>PO<sub>4</sub> (85.5 mg, 0.4 mmol, 2.0 equiv), Cs<sub>2</sub>CO<sub>3</sub> (195.5 mg, 0.6 mmol, 3.0 equiv), HCOOK (50.5 mg, 0.6 mmol, 3.0 equiv), 3DPAFIPN (8.0 mg, 6.2 mol%), DABCO (6.8 mg, 30 mol%). The tube was taken out of the glovebox. Subsequently, D<sub>2</sub>O (40 mg, 10 equiv), the degassed anhydrous DMSO (2 mL, 0.1 M) and the **1a** (36.05 mg, 0.2 mmol) were added into the tube via syringe. Then the tube was evacuated and back-filled with CO<sub>2</sub> for 10 times. Finally, the tube was placed under 30 W blue LEDs ( $\lambda$  = 450 - 455 nm, 3.0 cm - 4.5 cm away from the LEDs, with fans to keep the reaction temperature at 25 - 33 °C) light source and stirred for 24 h. Then, the mixture was quenched with H<sub>2</sub>O and 2 mL of HCl (2 N), extracted with EtOAc three times. The resulting solution was concentrated by rotary evaporation. The residual was purified by column chromatography on silica gel to give the desired product **2a<sub>H</sub>-DH** (30 mg, 65%). <sup>1</sup>H NMR (400 MHz, CD<sub>3</sub>OD)  $\delta$  7.27 - 7.23 (m, 8H), 7.19 - 7.13 (m, 2H), 4.50 (t, *J* = 8.0 Hz, 0.51H), 3.05 - 3.03 (m, 2H). <sup>13</sup>C NMR (100 MHz, CD<sub>3</sub>OD)  $\delta$  175.7, 145.3, 145.2, 129.5, 128.8, 128.7, 127.4, 48.5, 41.5, 41.4.

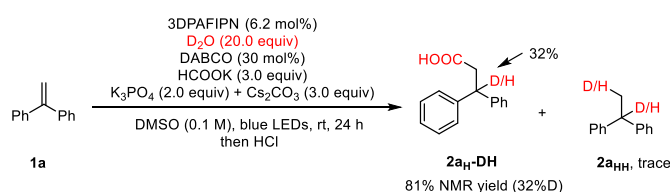

An oven-dried Schlenk tube (25 mL) containing a stirring bar was cooled to room temperature. The Schlenk tube was then introduced in a glovebox, where it was charged with K<sub>3</sub>PO<sub>4</sub> (85.5 mg, 0.4 mmol, 2.0 equiv), Cs<sub>2</sub>CO<sub>3</sub> (195.5 mg, 0.6 mmol, 3.0 equiv), HCOOK (50.5 mg, 0.6 mmol, 3.0 equiv), 3DPAFIPN (8.0 mg, 6.2 mol%), DABCO (6.8 mg, 30 mol%). The tube was taken out of the glovebox. Subsequently, D<sub>2</sub>O (80 mg, 20 equiv), the degassed anhydrous DMSO (2 mL, 0.1 M) and the **1a** (36.05 mg, 0.2 mmol) were added into the tube via syringe. Then the tube was evacuated and back-filled with N<sub>2</sub> for 10 times. Finally, the tube was placed under 30 W blue LEDs ( $\lambda$  = 450 - 455 nm, 3.0 cm - 4.5 cm away from the LEDs, with fans to keep the reaction temperature at 25 - 33 °C) light source and stirred for 24 h. Then, the mixture was quenched with H<sub>2</sub>O and 2 mL of HCl (2 N), extracted with EtOAc three times. The resulting solution was concentrated by rotary evaporation and the

yield of crude products was determined via  $^1\text{H}$  NMR using  $\text{CH}_2\text{Br}_2$  as internal standard.

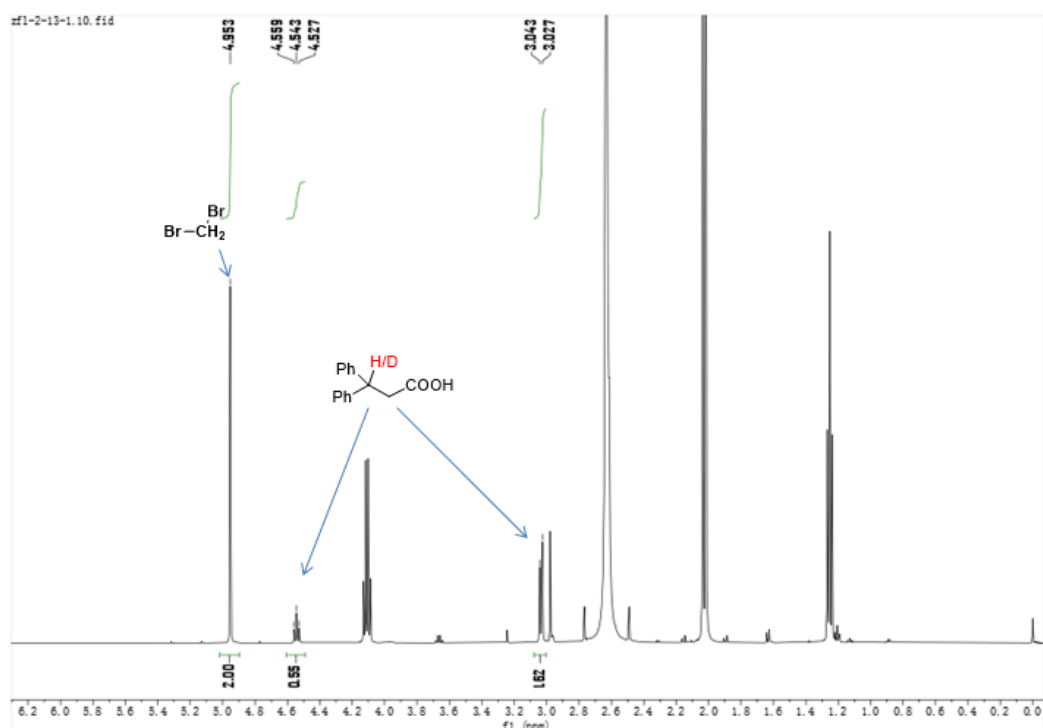

**Figure S2.** Reaction in the presence of  $\text{D}_2\text{O}$ .

### The reaction in the absence of HCOOK

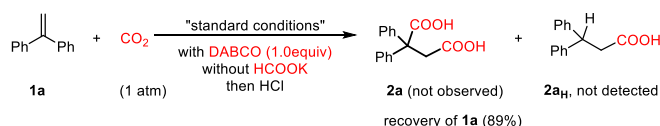

An oven-dried Schlenk tube (25 mL) containing a stirring bar was cooled to room temperature. The Schlenk tube was then introduced in a glovebox, where it was charged with  $\text{K}_3\text{PO}_4$  (85.5 mg, 0.4 mmol, 2.0 equiv),  $\text{Cs}_2\text{CO}_3$  (195.5 mg, 0.6 mmol, 3.0 equiv), HCOOK (50.5 mg, 0.6 mmol, 3.0 equiv), 3DPAFIPN (8.0 mg, 6.2 mol%), DABCO (6.8 mg, 30 mol%). The tube was taken out of the glovebox. Subsequently, the degassed anhydrous DMSO (2 mL, 0.1 M) and the **1a** (36.05 mg, 0.2 mmol) were added into the tube via syringe. Then the tube was evacuated and back-filled with  $\text{CO}_2$  for 10 times. Finally, the tube was placed under 30 W blue LEDs ( $\lambda = 450 - 455$  nm, 3.0 cm - 4.5 cm away from the LEDs, with fans to keep the reaction temperature at 25 - 33  $^\circ\text{C}$ ) light source and stirred at ambient temperature for 24 h. Then, the

mixture was quenched with H<sub>2</sub>O and 2 mL of HCl (2 N), extracted with EtOAc three times. The resulting solution was concentrated by rotary evaporation and the yield of crude products was determined via <sup>1</sup>H NMR using CH<sub>2</sub>Br<sub>2</sub> as internal standard.

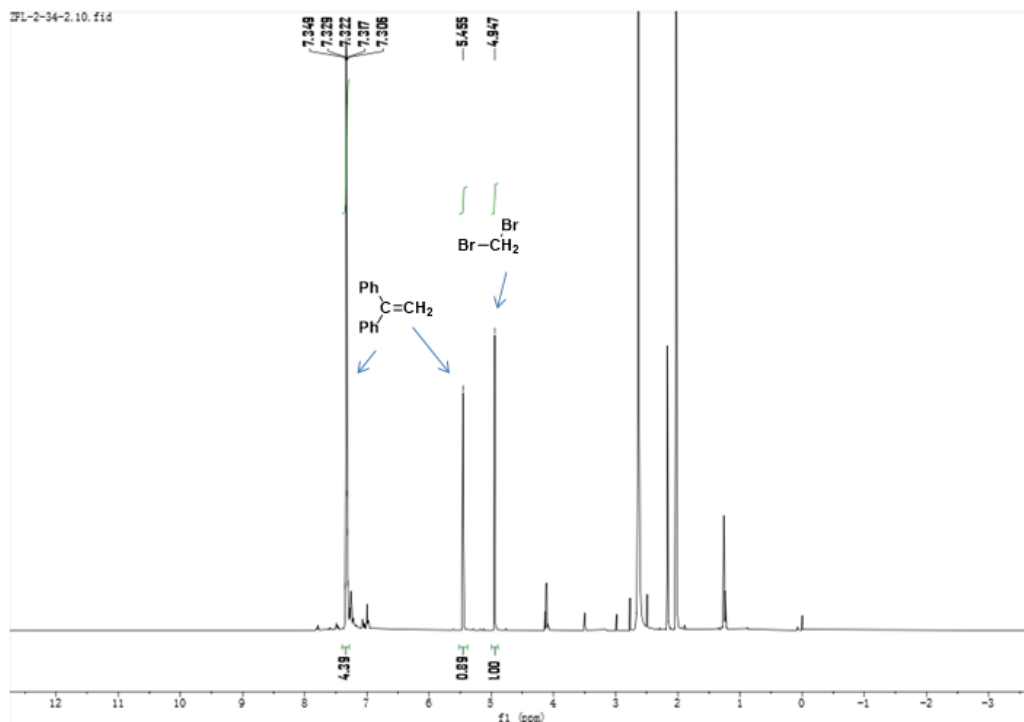

Figure S3. The reaction in the absence of HCOOK.

### <sup>13</sup>C-labelling experiment using commercially available H<sup>13</sup>COONa

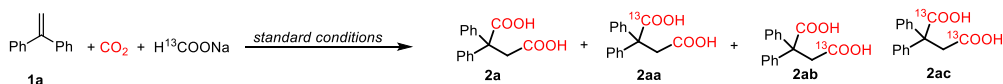

An oven-dried Schlenk tube (25 mL) containing a stirring bar was cooled to room temperature. The Schlenk tube was then introduced in a glovebox, where it was charged with K<sub>3</sub>PO<sub>4</sub> (85.5 mg, 0.4 mmol, 2.0 equiv), Cs<sub>2</sub>CO<sub>3</sub> (195.5 mg, 0.6 mmol, 3.0 equiv), H<sup>13</sup>COONa (40.8 mg, 0.6 mmol, 3.0 equiv), 3DPAFIPN (8.0 mg, 6.2 mol%), DABCO (6.8 mg, 30 mol%). The tube was taken out of the glovebox. Subsequently, the degassed anhydrous DMSO (2 mL, 0.1 M) and the **1a** (36.05 mg, 0.2 mmol) were added into the tube via syringe. Then the tube was evacuated and back-filled with CO<sub>2</sub> for 10 times. Finally, the tube was placed under 30 W blue LEDs (λ = 450 - 455 nm, 3.0 cm - 4.5 cm away from the LEDs, with fans to keep the

reaction temperature at 25 - 33 °C) light source and stirred for 24 h. Then, the mixture was quenched with H<sub>2</sub>O and 2 mL of HCl (2 N), extracted with EtOAc three times. The resulting solution was concentrated by rotary evaporation. The residual was purified by column chromatography on silica gel to give the desired products **2a**+(**2aa**/**2ab**)+**2ac** (37 mg, 68%). <sup>1</sup>H NMR (400 MHz, CD<sub>3</sub>OD) δ 7.34 - 7.19 (m, 5H), 3.49 (s, 1H). <sup>13</sup>C NMR (100 MHz, CD<sub>3</sub>OD) δ 176.6, 174.3, 144.5, 129.9, 128.8, 127.8, 58.5, 49.6, 44.7.

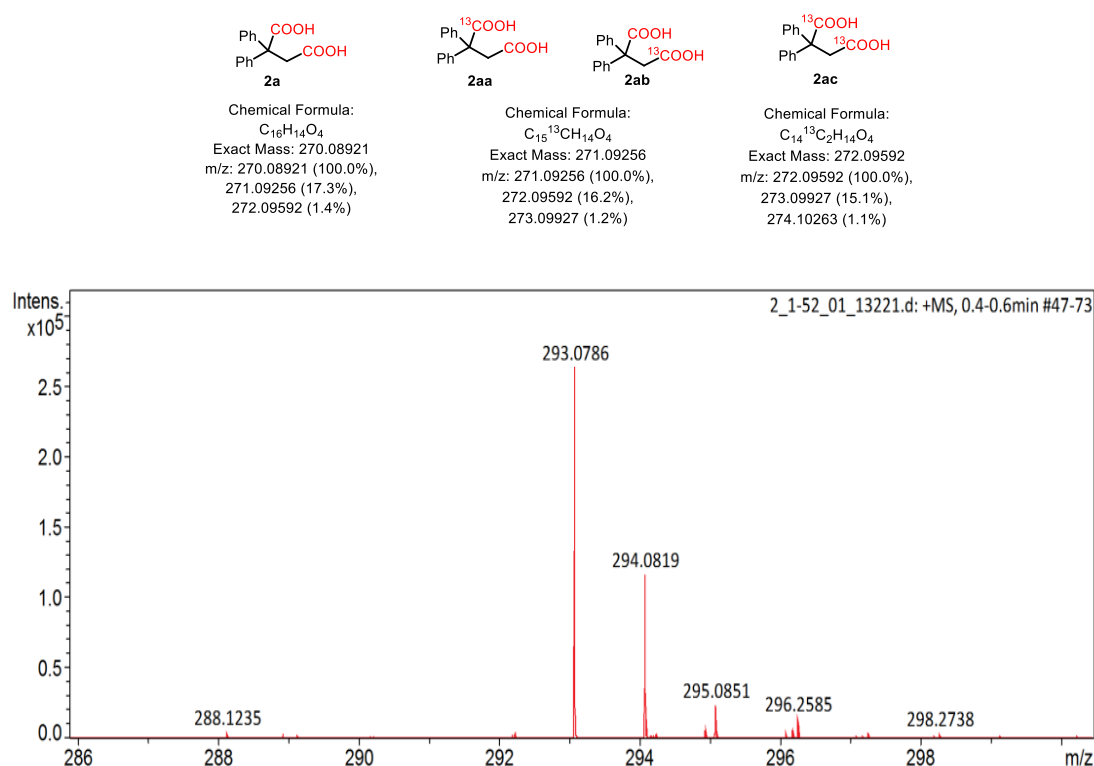

**Figure S4.** The products were detected by HR-MS.

| m/z      | Abundance |
|----------|-----------|
| 293.0786 | 875014    |
| 294.0819 | 388090    |
| 295.0851 | 78504     |

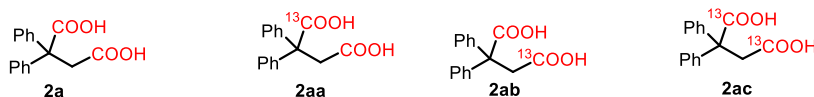

$$\mathbf{2a} : (\mathbf{2aa}+\mathbf{2ab}) : \mathbf{2ac} = 81 : 14 : 5$$

## The Application of the Reaction

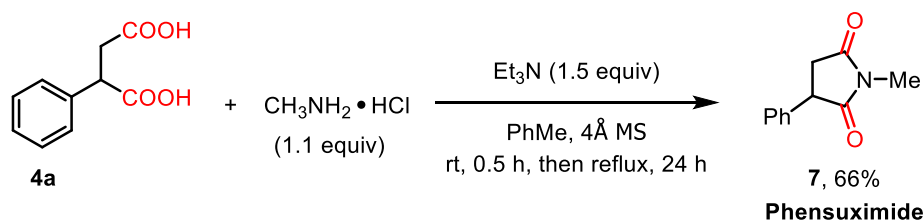

An oven-dried reaction tube (10 mL) containing a stirring bar was charged with **4a** (0.2 mmol, 38.8 mg), CH<sub>3</sub>NH<sub>2</sub>•HCl (0.22 mmol, 14.9 mg) and 4 Å Molecular sieves powder (200 mg). After degassed and filled with dry nitrogen repeated three times, Et<sub>3</sub>N (0.3 mmol, 30.4 mg) and toluene (2 mL) were added via syringe. The reaction solution was stirred for 0.5 h at room temperature and then heated to reflux for 24 h. The reaction mixture was filtered through a short pad of celite. After removing the solvent under reduced pressure, the residual was purified by silica gel column chromatography to obtain product **7** (25 mg, 66%).<sup>9</sup> <sup>1</sup>H NMR (500 MHz, CDCl<sub>3</sub>, TMS) δ 7.39 - 7.36 (m, 2H), 7.33 - 7.30 (m, 1H), 7.22 (d, *J* = 7.0 Hz, 2H), 4.03 (dd, *J* = 9.5, 4.5 Hz, 1H), 3.21 (dd, *J* = 18.5, 9.5 Hz, 1H), 3.07 (s, 1H), 2.84 (dd, *J* = 18.5, 5.0 Hz, 1H). <sup>13</sup>C NMR (126 MHz, CDCl<sub>3</sub>) δ 177.97, 176.40, 137.18, 129.33, 128.10, 127.51, 46.07, 37.25, 25.35.

## Stern-Volmer fluorescence quenching experiments

Fluorescence spectra were collected on Edinburgh FS5 spectrofluorimeter. Samples for the quenching experiments were prepared in a 4 mL glass cuvette with a septum screw cap. 3DPAFIPN was irradiated at 420 nm and the emission intensity at 550 nm was observed. In a typical experiment, the emission spectrum of a  $5.0 \times 10^{-5}$  M solution of 3DPAFIPN in DMSO was collected.

DABCO: A stock solution of DABCO (56.1 mg, 0.5 mmol) in 5 mL of DMSO was prepared. Then, different amounts of this stock solution were added to a solution of the 3DPAFIPN in DMSO ( $5.0 \times 10^{-5}$  M).

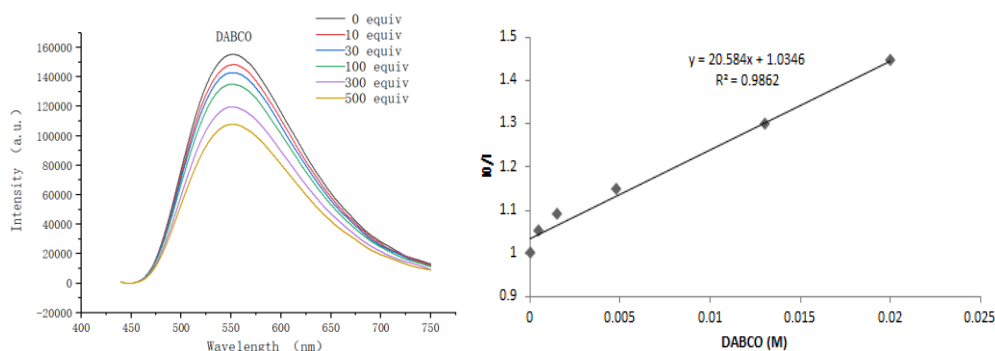

**Figure S5.** Stern-Volmer quenching by DABCO.

**HCOOK:** A stock solution of HCOOK (42.1 mg, 0.5 mmol) in 10 ml of DMSO was prepared. Then, different amounts of this stock solution were added to a solution of the 3DPAFIPN in DMSO ( $5.0 \times 10^{-5}$  M).

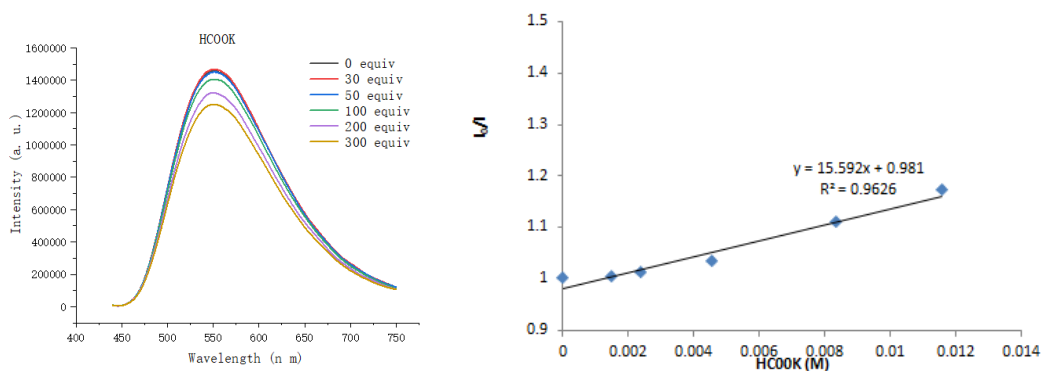

**Figure S6.** Stern-Volmer quenching by HCOOK.

**1a:** A stock solution of **1a** (90.1 mg, 0.5 mmol) in 5 ml of DMSO was prepared. Then, different amounts of this stock solution were added to a solution of the 3DPAFIPN in DMSO ( $5.0 \times 10^{-5}$  M).

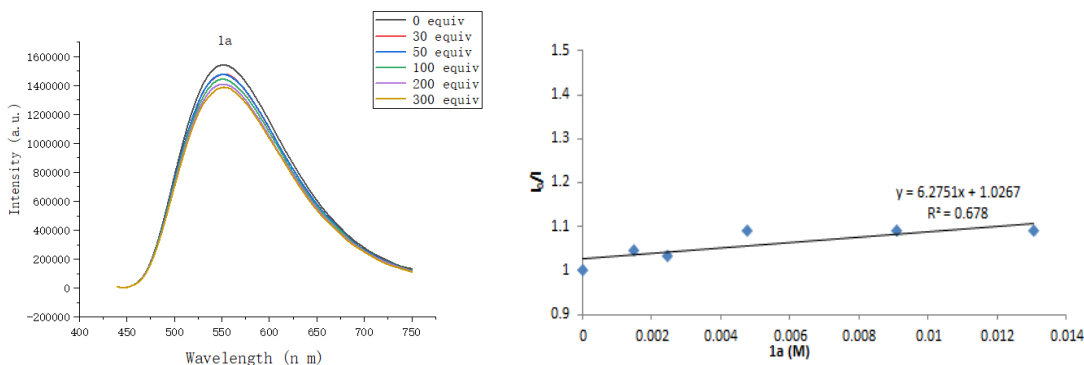

**Figure S7.** Stern-Volmer quenching by **1a**.

## 5. References

1. Elisabeth, S.; Tillmann, G. *et al.* A toolbox approach to construct broadly applicable metal-free catalysts for photoredox chemistry: deliberate tuning of redox potentials and importance of halogens in donor–acceptor cyanoarenes. *J. Am. Chem. Soc.* **2018**, *140*, 15353-15365.
2. Ju, T.; Zhou, Y.-Q.; Cao, K.-G. *et al.* Dicarboxylation of alkenes, allenes and (hetero)arenes with CO<sub>2</sub> via visible-light photoredox catalysis. *Nat Catal* **2021**, *4*, 304-311.
3. Kofron, W. G.; Wideman, L. G. Specific synthesis and selective alkylation and condensation of monoesters of substituted succinic acids. *J. Org. Chem.* **1972**, *37*, 555-559.
4. Małkosza, M.; Marcinowicz, A. Simple synthesis of arylsuccinic acids. *Synthesis*, **2001**, *9*, 1311-1312.
5. Gan, Z.-J.; Wang, Y.-H.; Xu, Y.-G.; Guo, T.; Wang, J.; Song, Q. *et al.* Discovery, stereospecific characterization and peripheral modification of 1-(pyrrolidin-1-ylmethyl)-2-[(6-chloro-3-oxo-indan)-formyl]-1,2,3,4-tetrahydroisoquinolines as novel selective  $\kappa$  opioid receptor agonists. *Org. Biomol. Chem.* **2015**, *13*, 5656-5673.
6. Manoni, F.; Cornaggia, C.; Murray, J.; Tallona, S. J. Catalytic, enantio- and diastereoselective synthesis of  $\gamma$ -butyrolactones incorporating quaternary stereocentres. *Chem. Commun.* **2012**, *48*, 6502-6504.
7. Padmanabhan, M.; James C.; Thirumurugan A. *Dalton Trans.* **2008**, *21*, 2809-2811.
8. Combee, L. A.; Johnson, S. L.; Laudenschlager, J. E.; Hilinski, M. K., Rh(II)-catalyzed nitrene-transfer [5 + 1] cycloadditions of aryl-substituted vinylcyclopropanes. *Org. Lett.* **2019**, *21*, 2307-2311.

9. Mao, Z., Huang, S., Gao, L. *et al.* A novel and versatile method for the enantioselective syntheses of tropane alkaloids. *Sci. China Chem.* **2014**, *57*, 252–264.

## 6. Copies of $^1\text{H}$ and $^{13}\text{C}$ NMR spectra

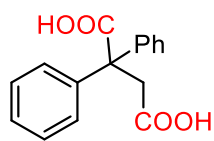

$^1\text{H}$  NMR and  $^{13}\text{C}$  NMR spectra of 2a

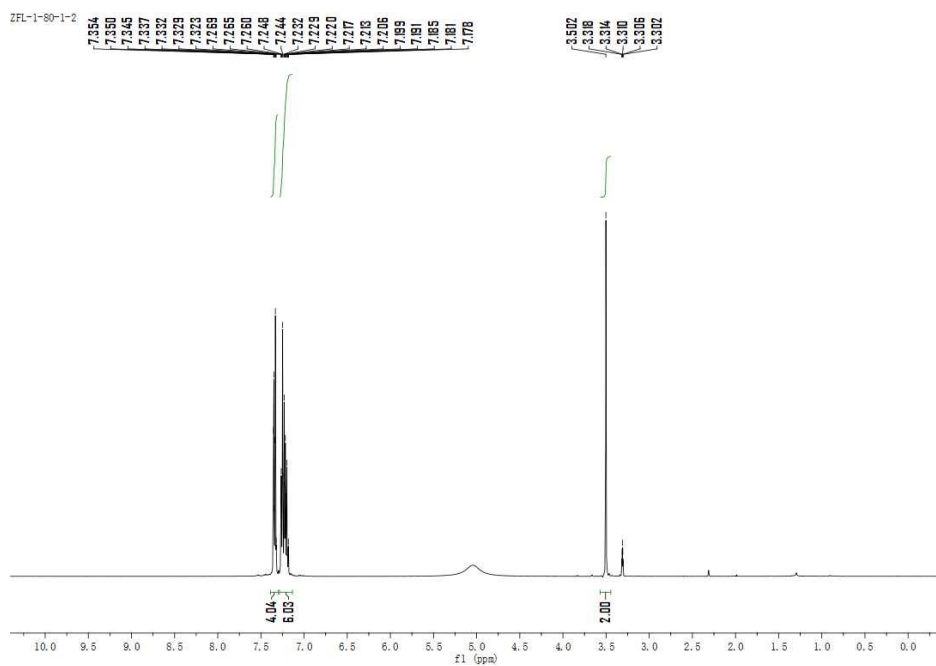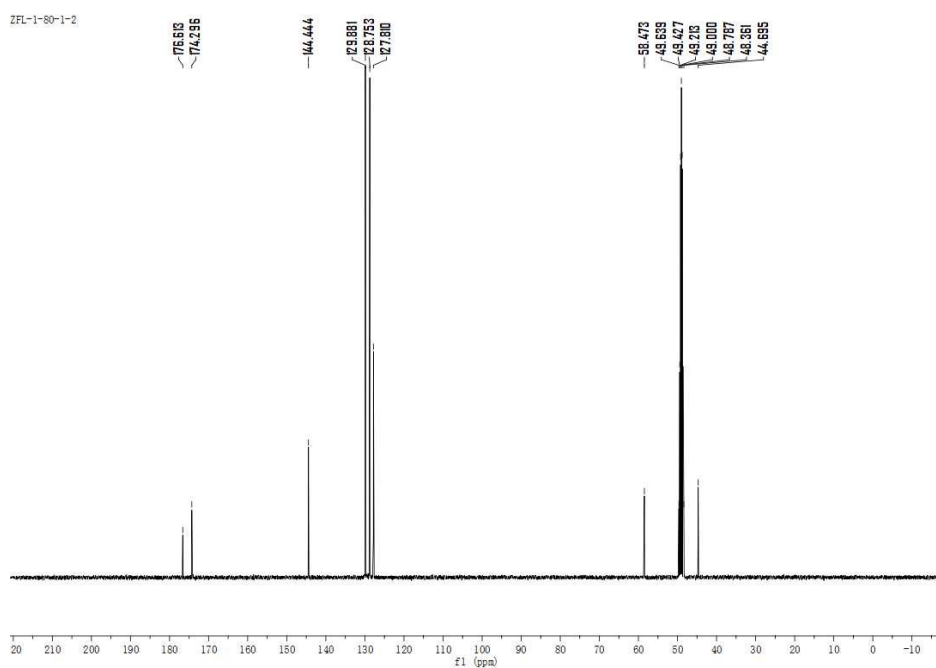

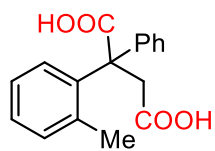

<sup>1</sup>H NMR and <sup>13</sup>C NMR spectra of 2b

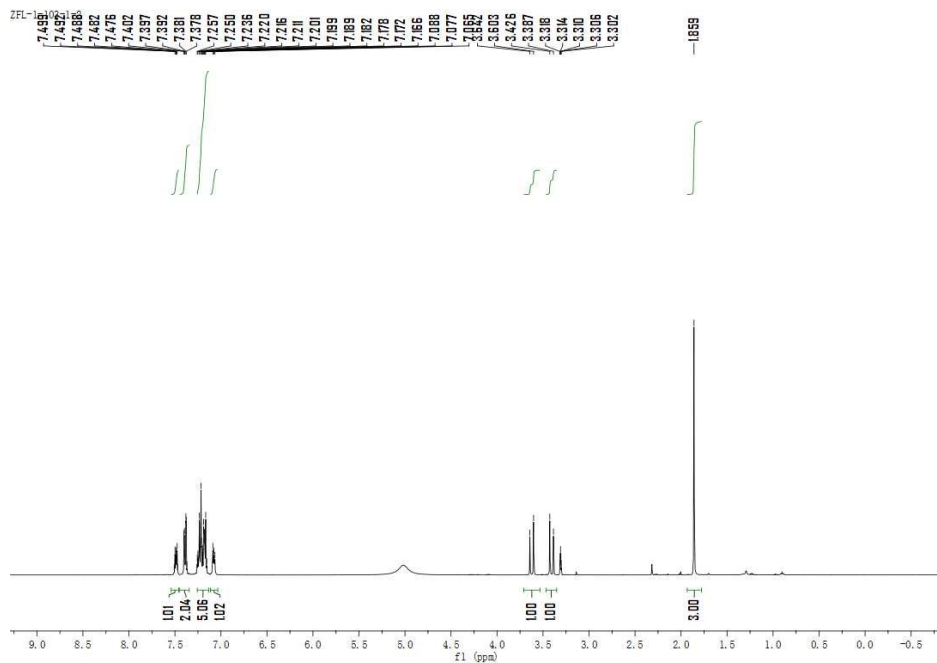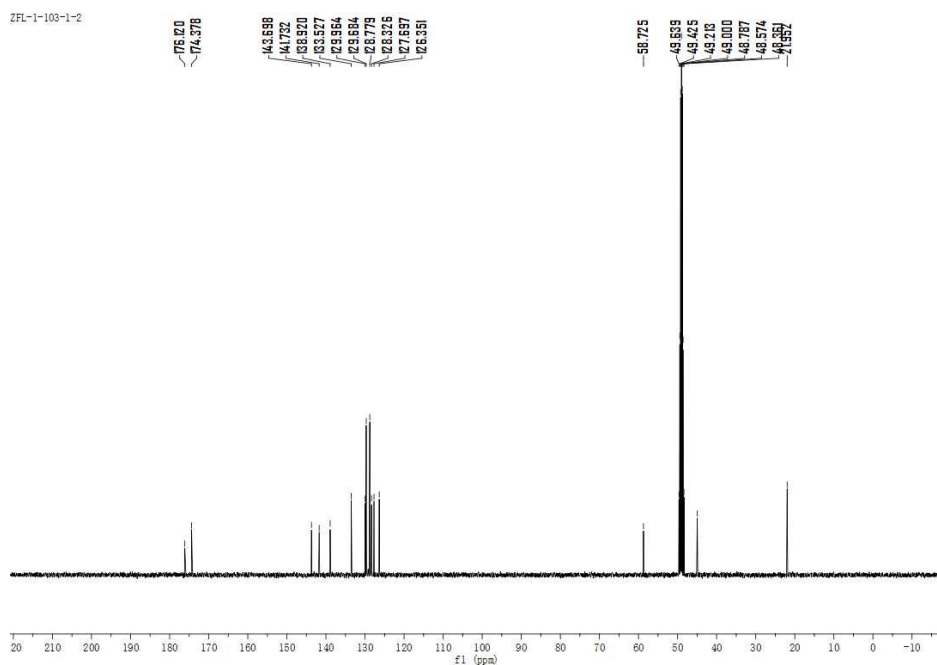

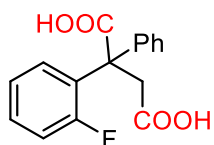

<sup>1</sup>H NMR and <sup>13</sup>C NMR, DEPT-135°, <sup>19</sup>F NMR spectra of 2c

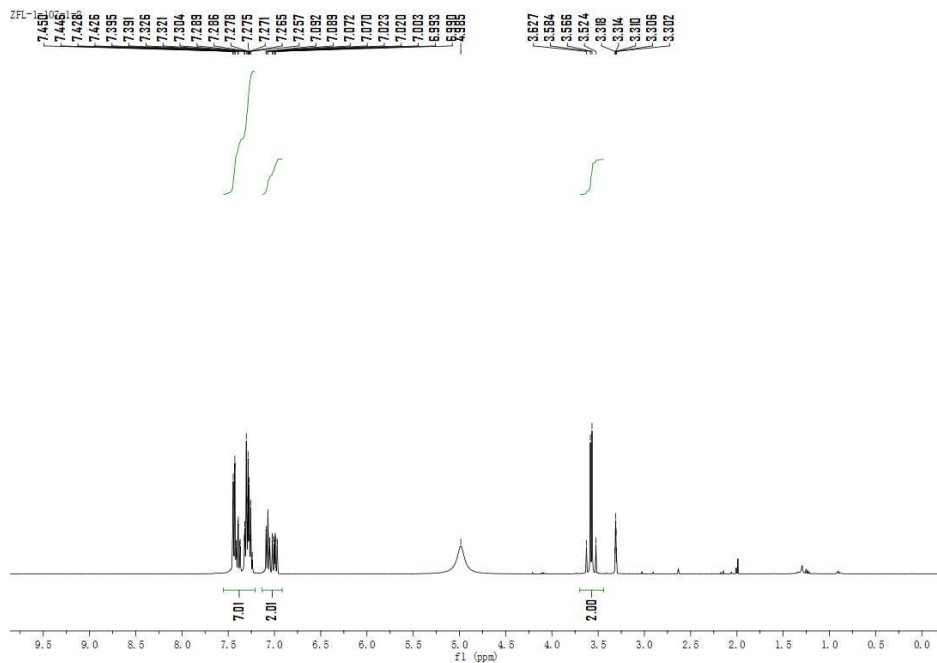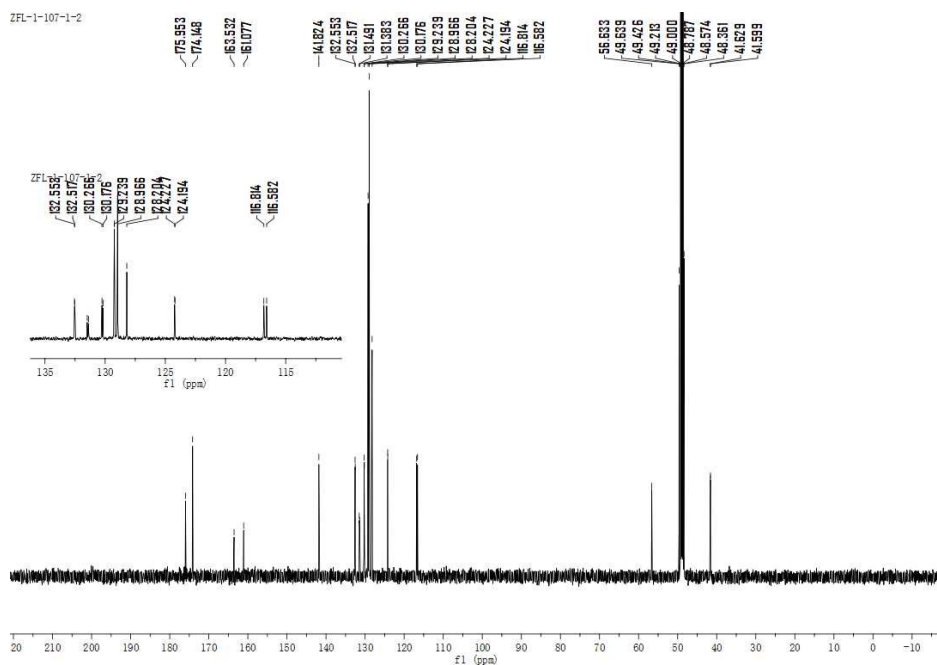

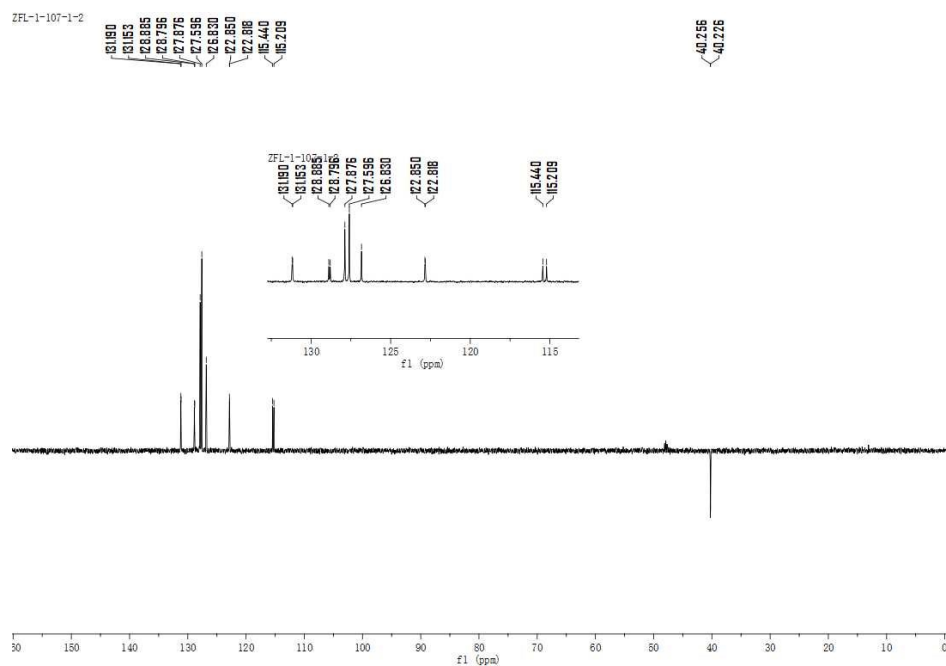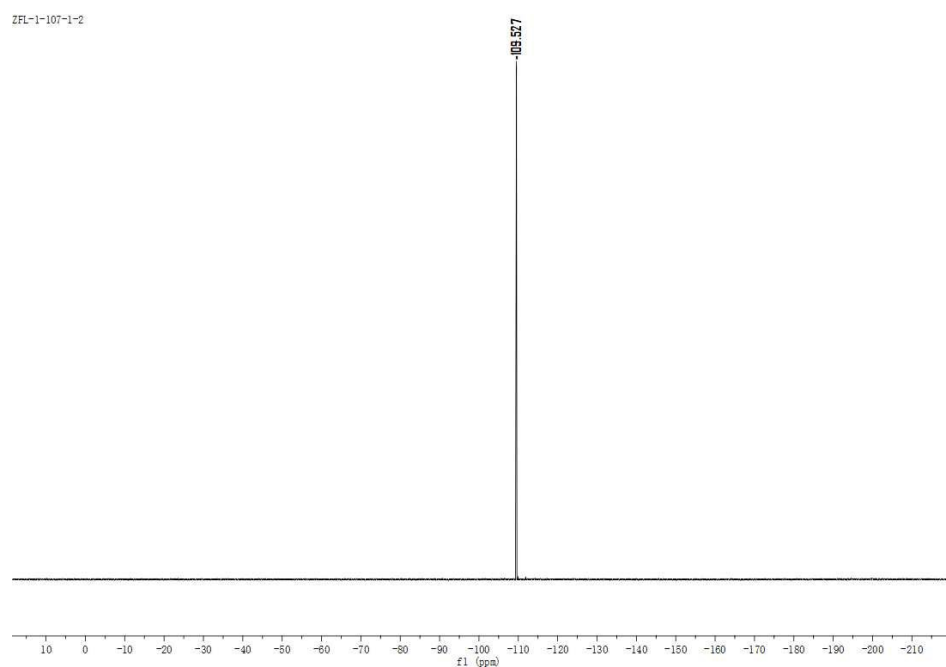

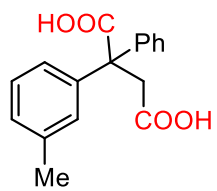

$^1\text{H}$  NMR and  $^{13}\text{C}$  NMR spectra of 2d

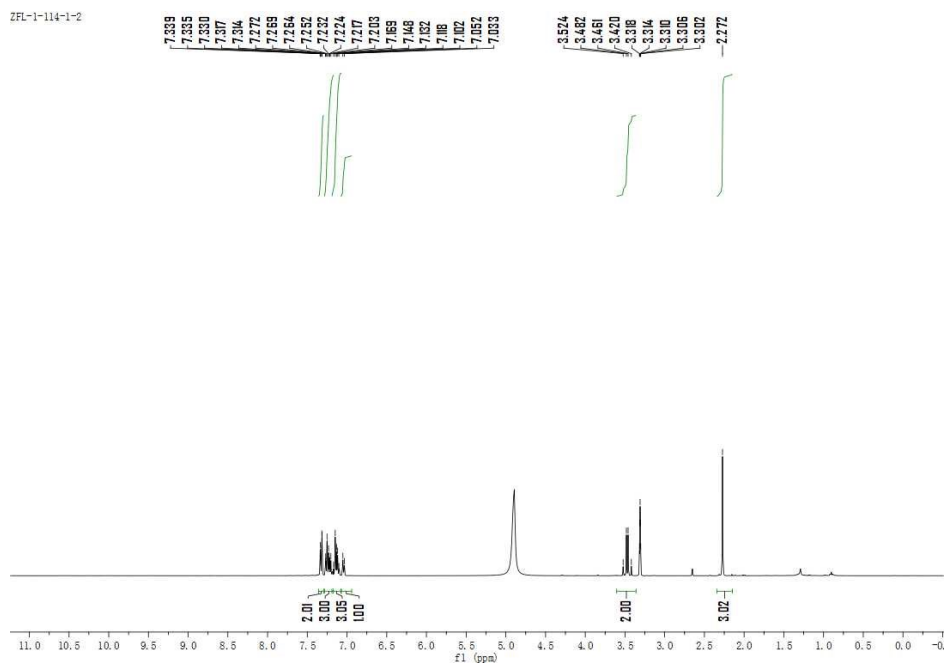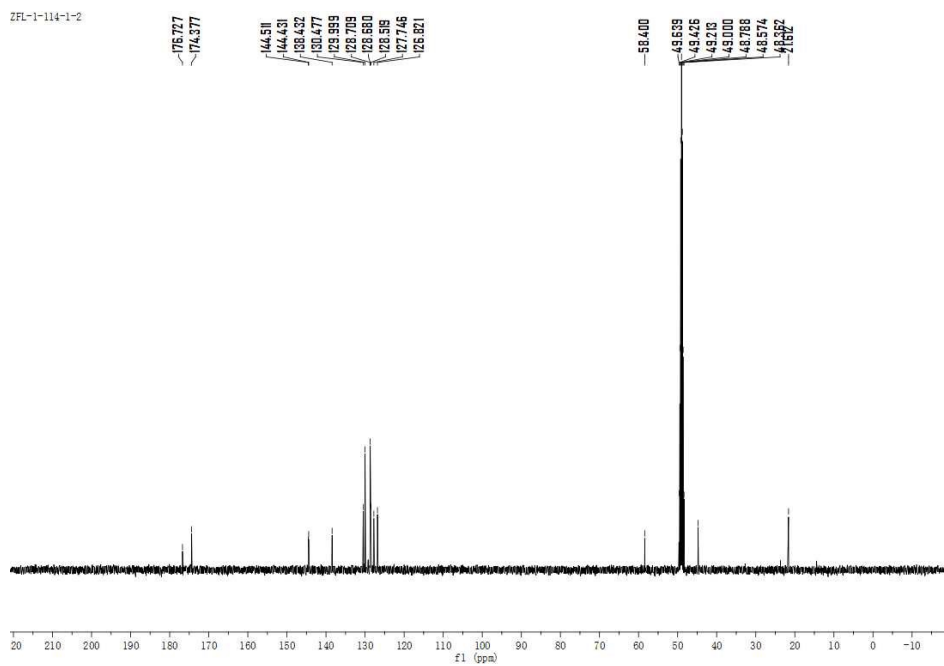

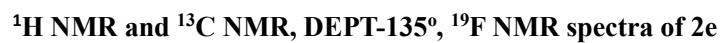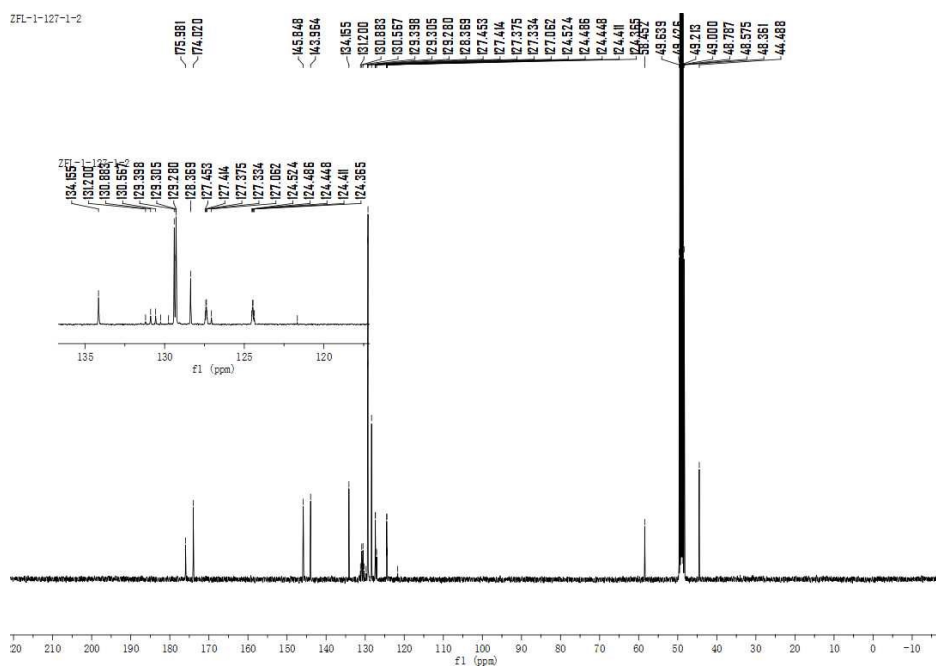

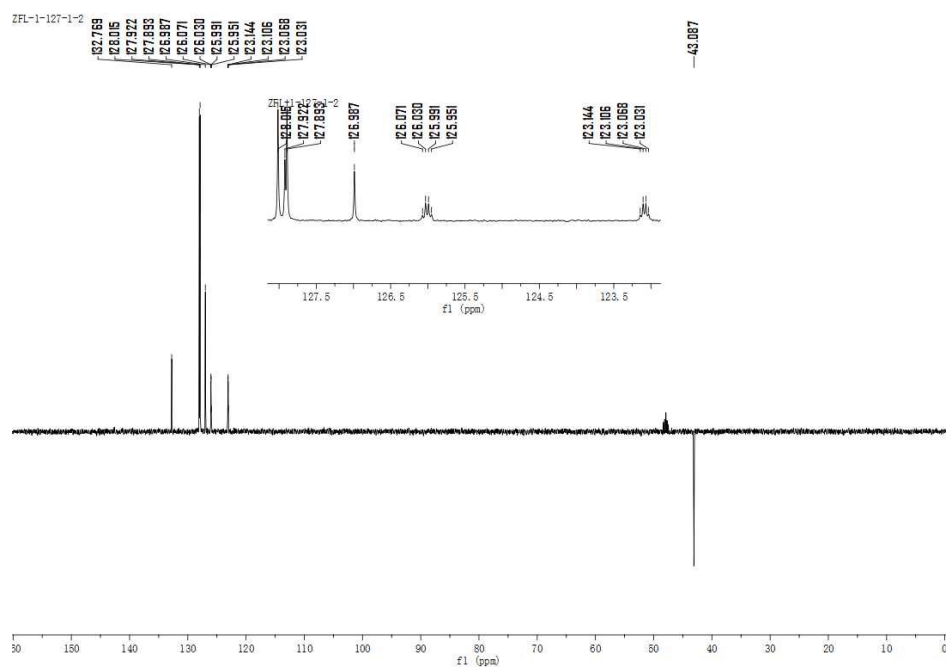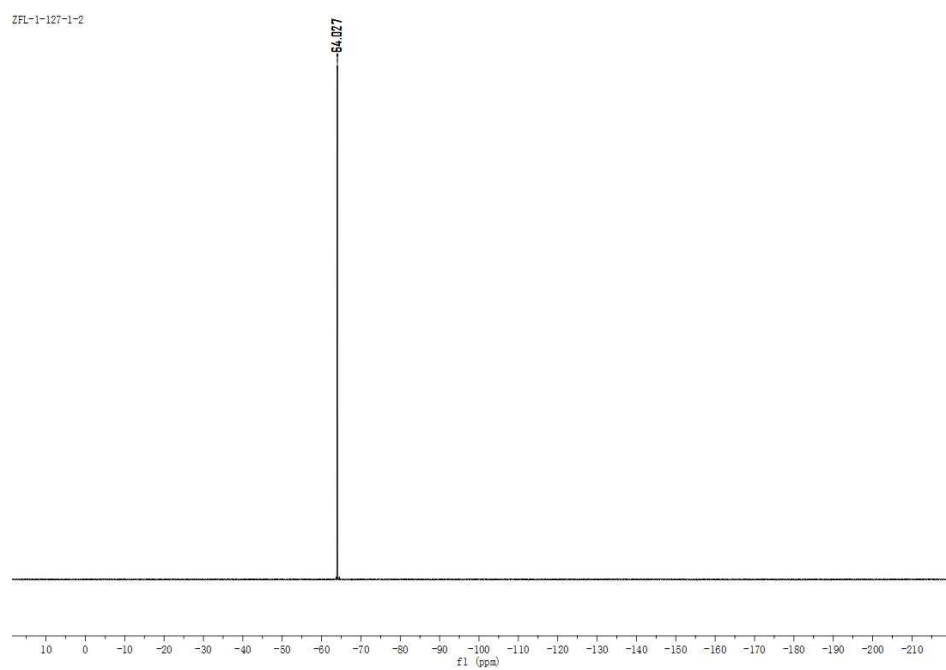

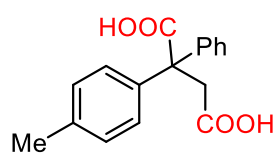

$^1\text{H}$  NMR and  $^{13}\text{C}$  NMR of 2f

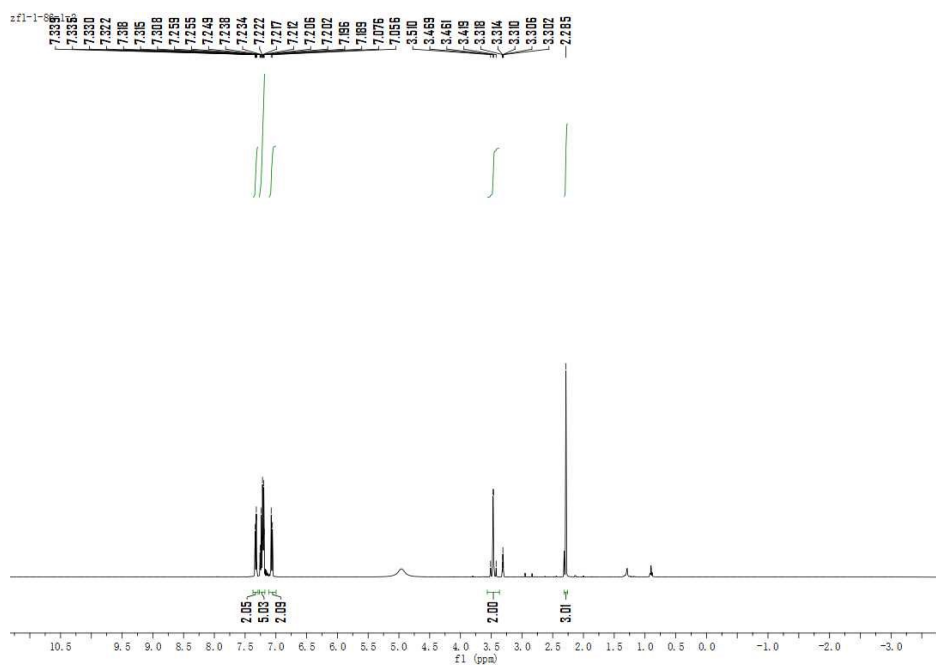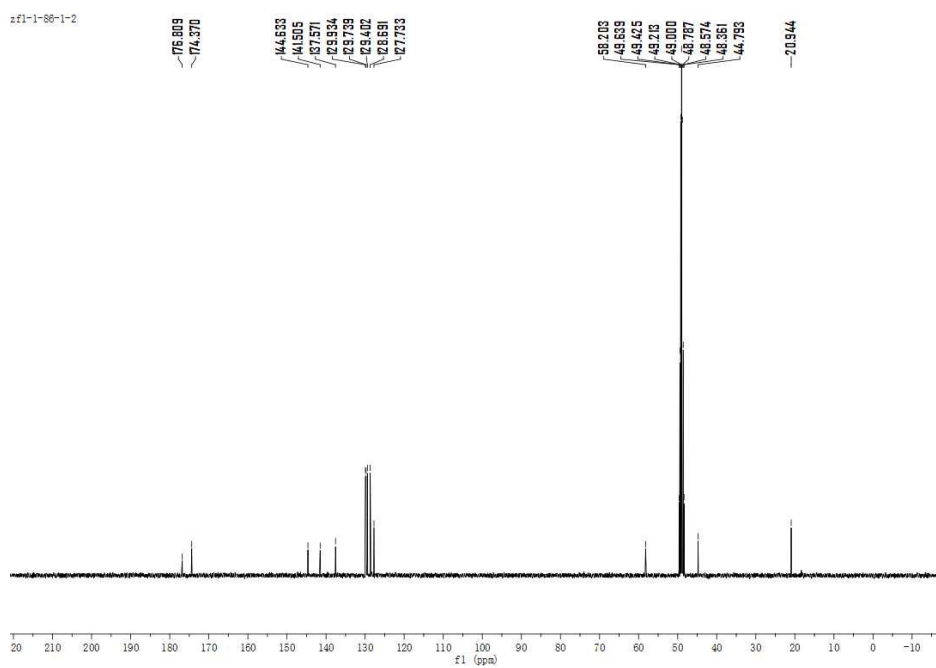

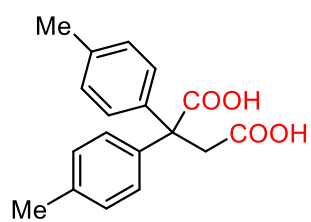

$^1\text{H}$  NMR and  $^{13}\text{C}$  NMR spectra of 2g

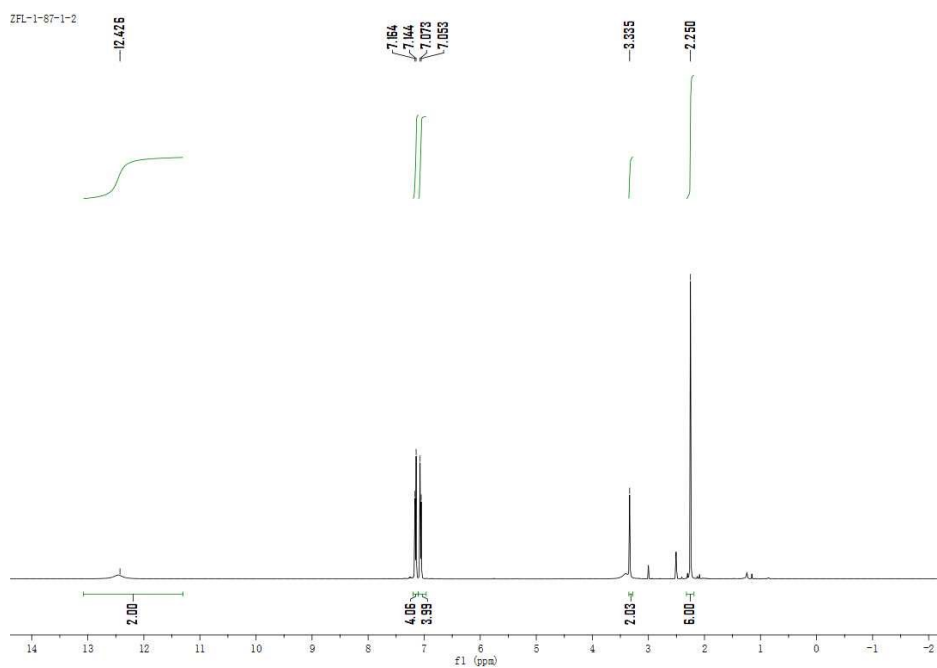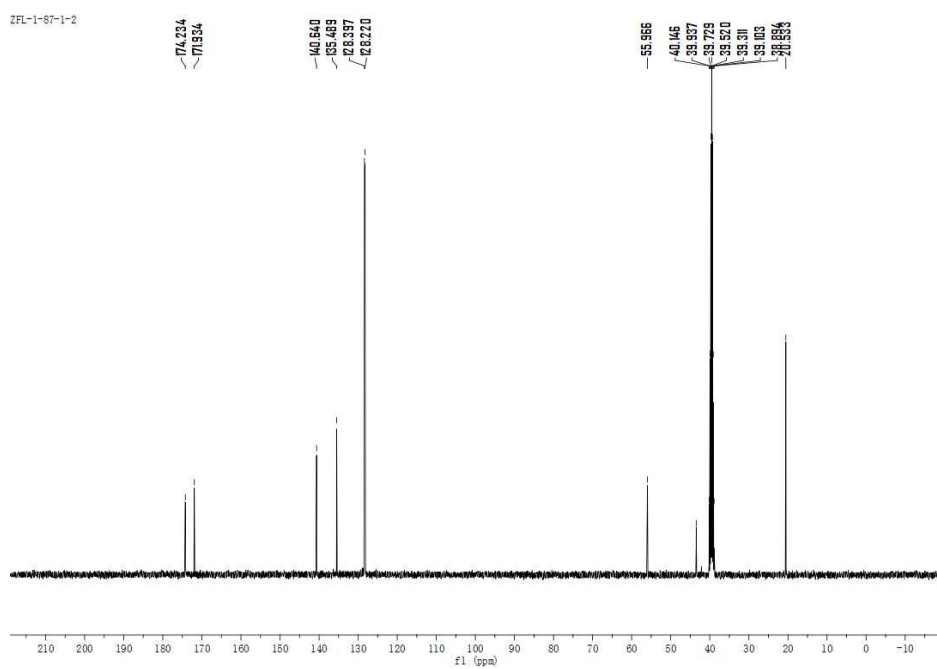

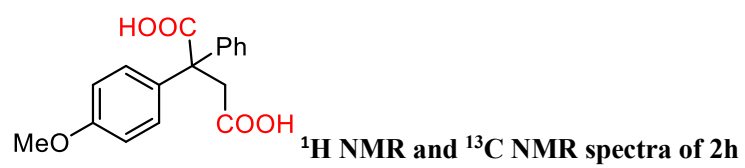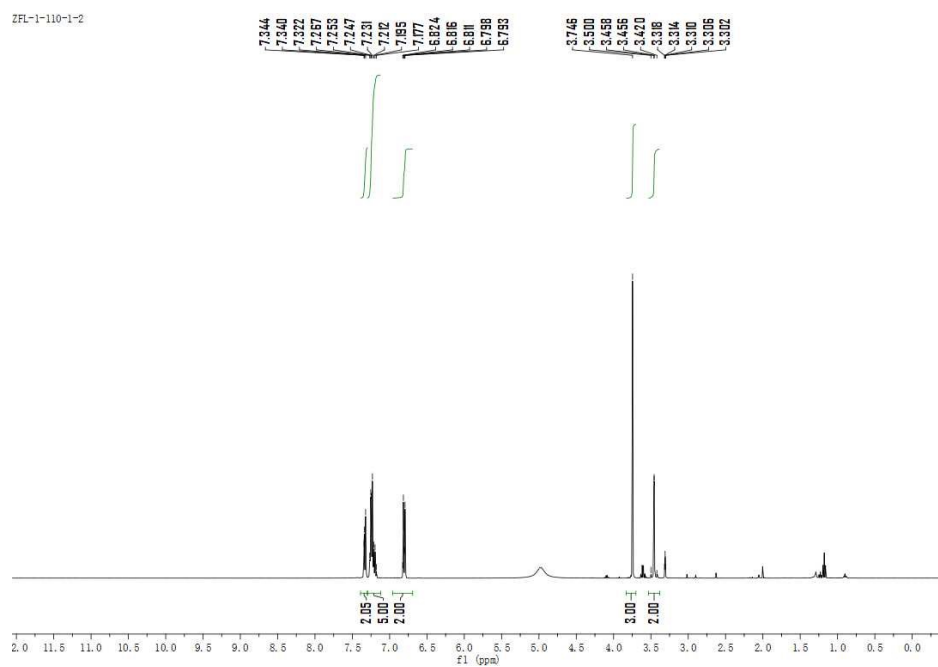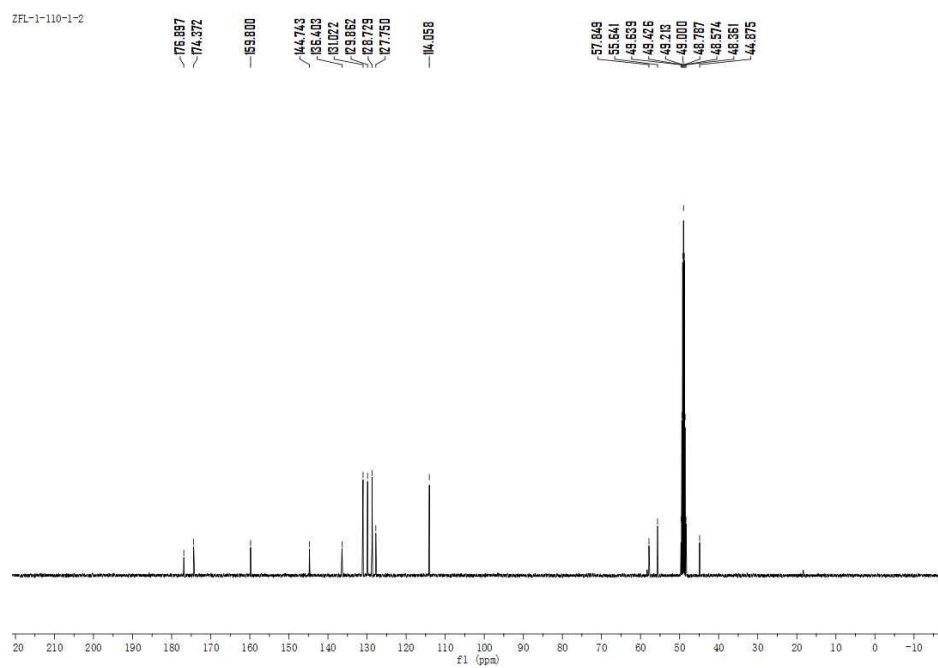

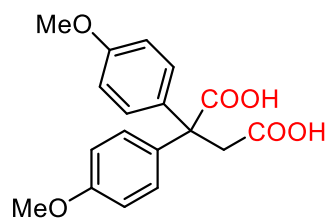

$^1\text{H}$  NMR and  $^{13}\text{C}$  NMR spectra of 2i

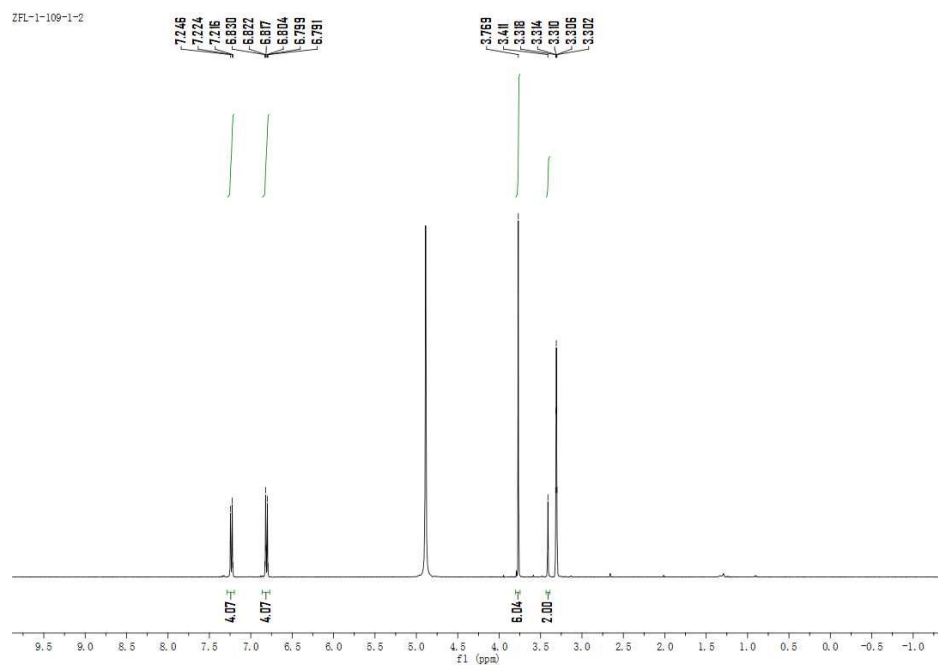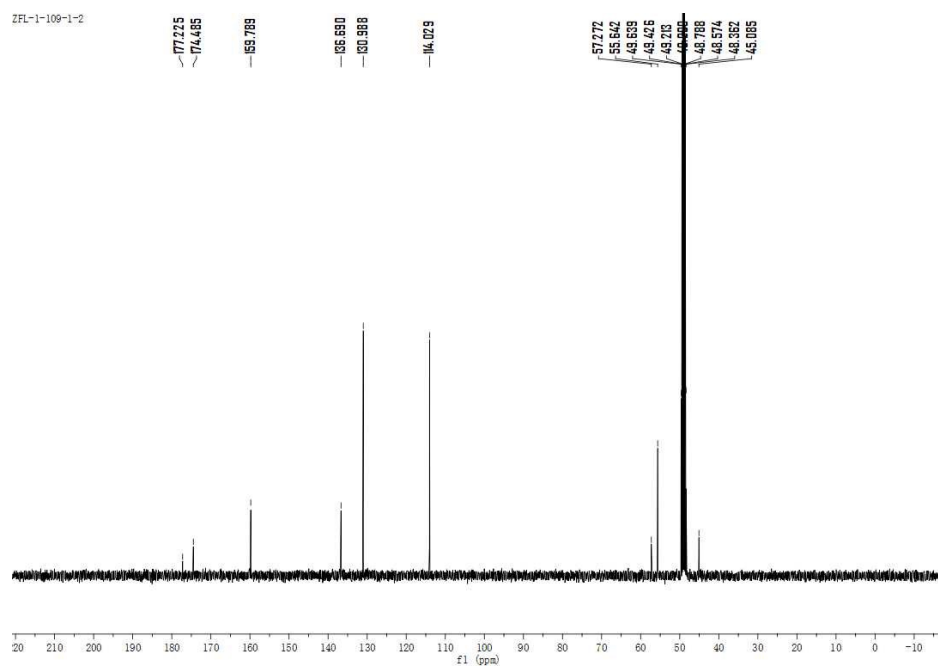

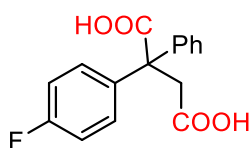

$^1\text{H}$  NMR and  $^{13}\text{C}$  NMR, DEPT-135°,  $^{19}\text{F}$  NMR spectra of 2j

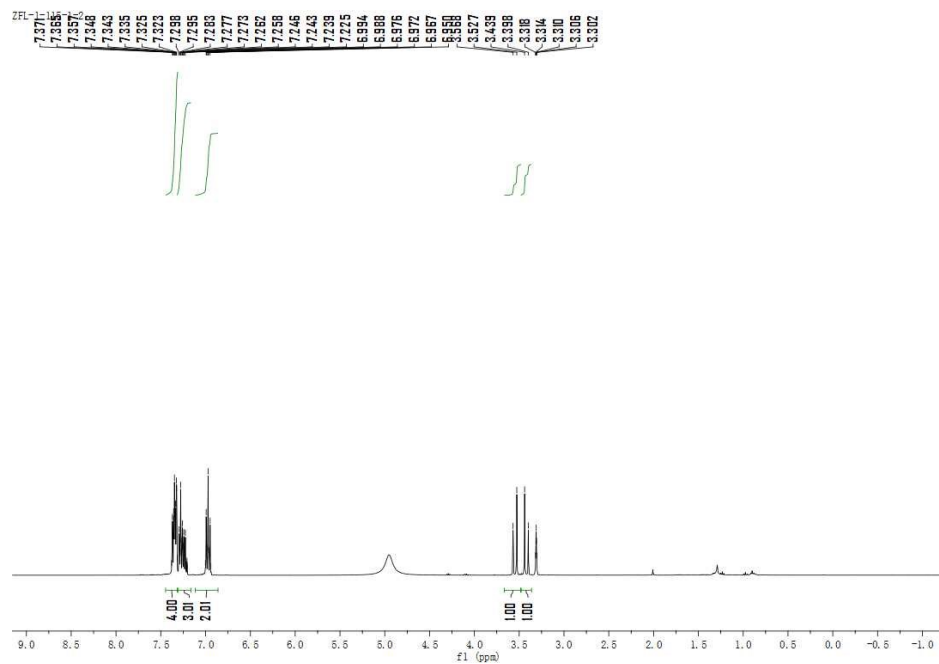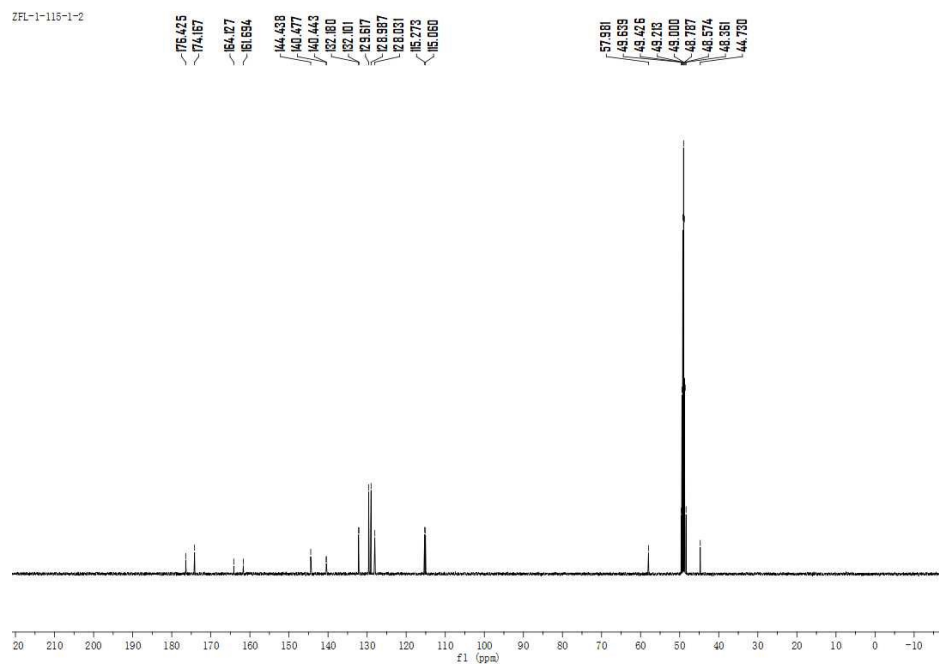

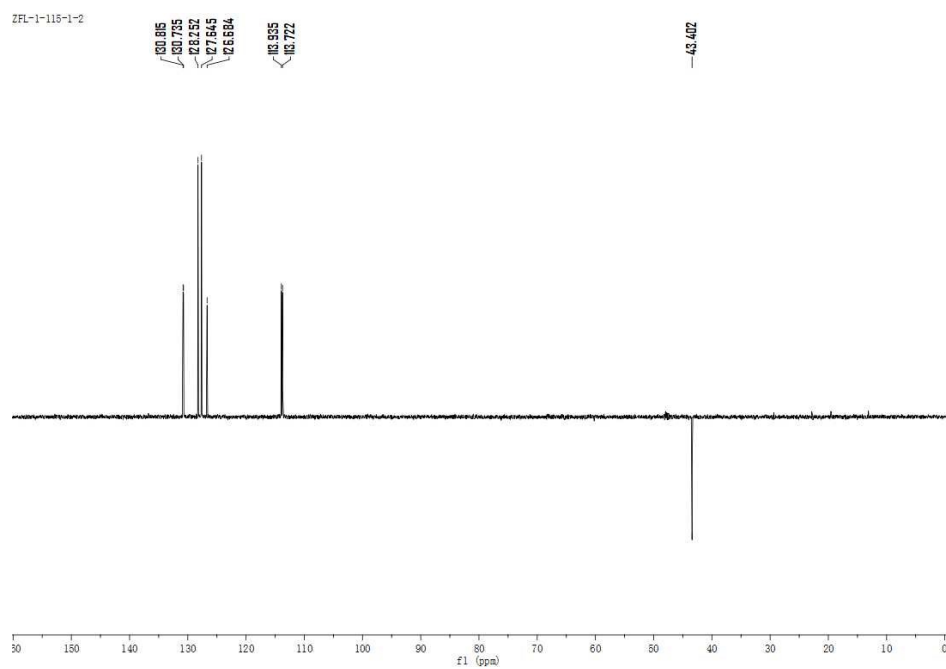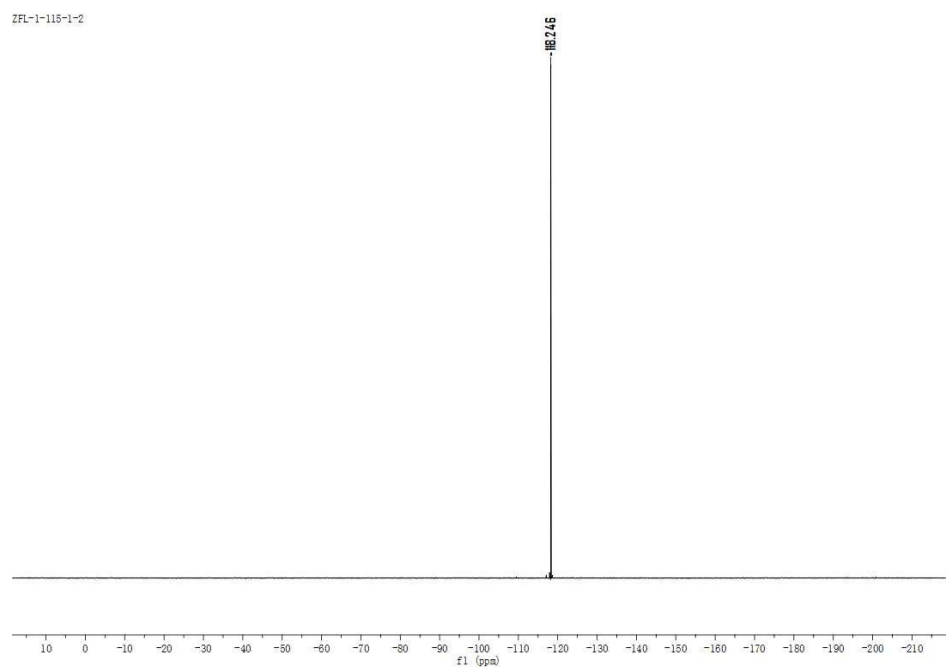

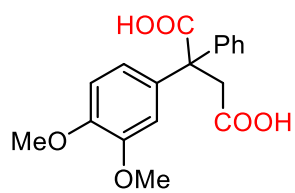

**<sup>1</sup>H NMR and <sup>13</sup>C NMR spectra of 2k**

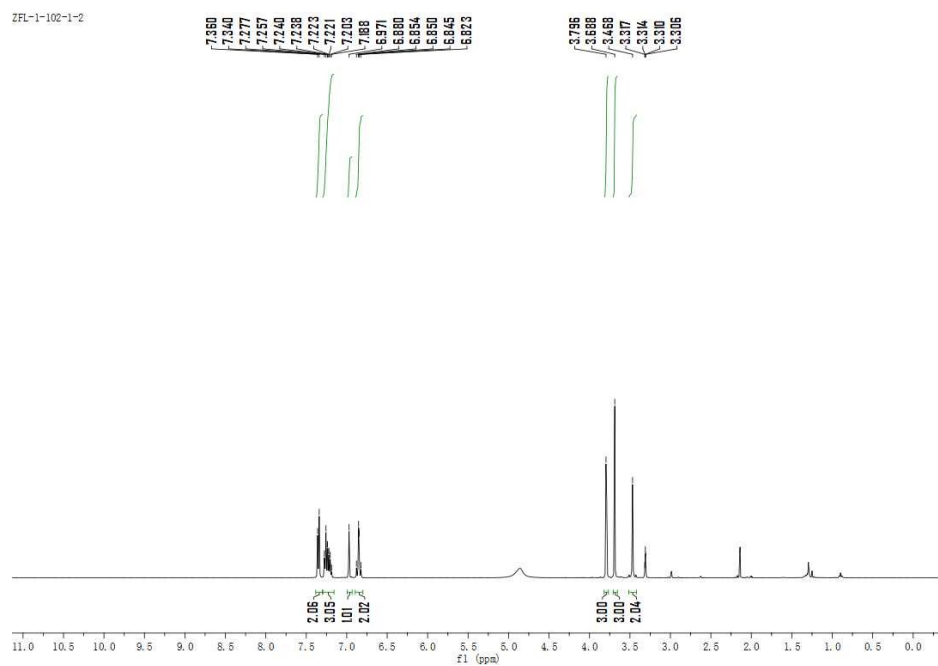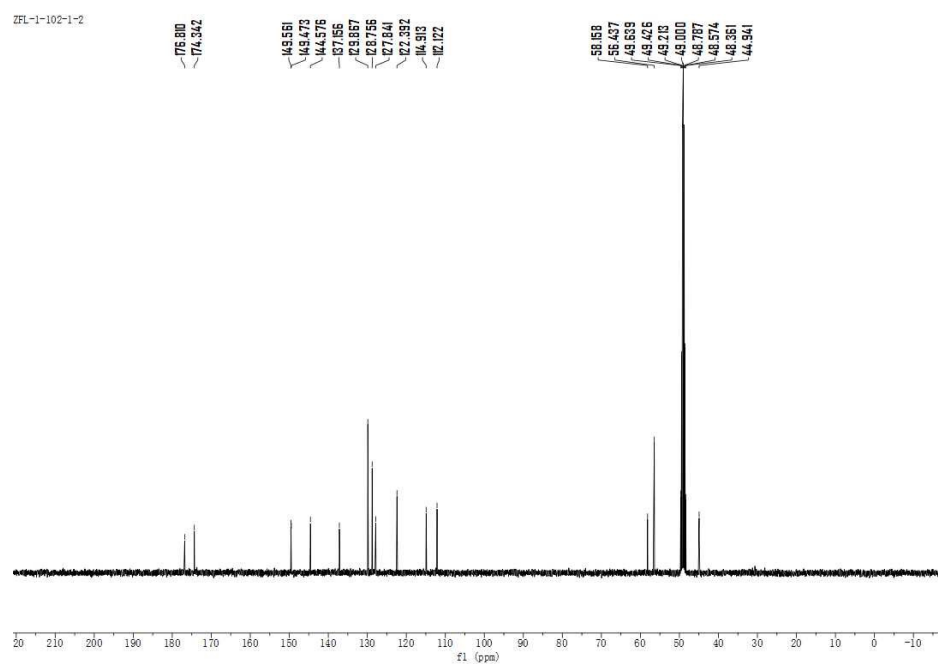

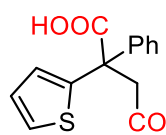

<sup>1</sup>H NMR and <sup>13</sup>C NMR spectra of 2l

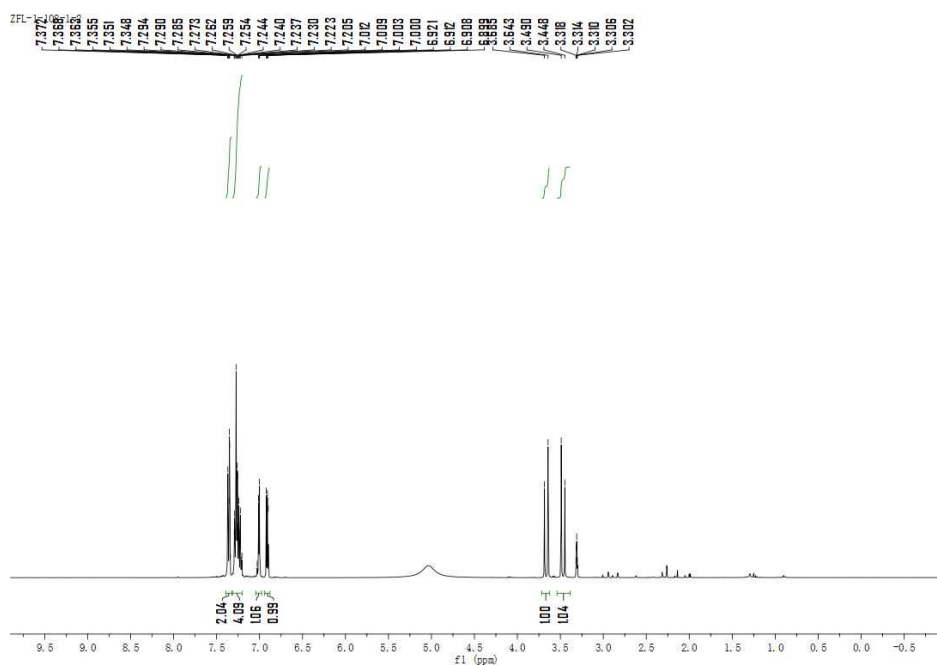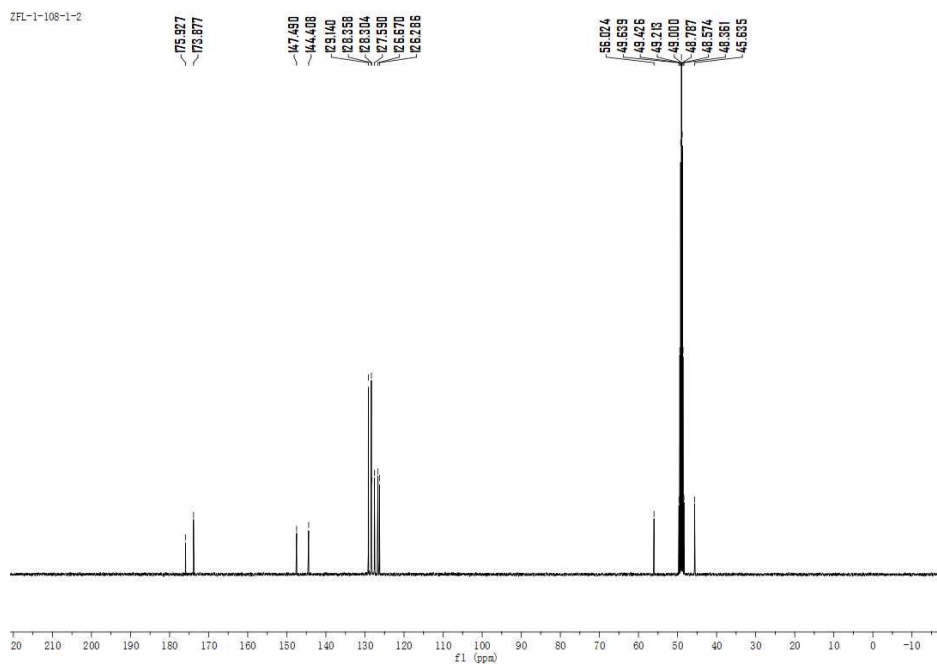

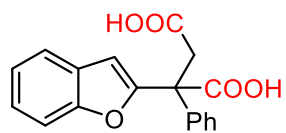

$^1\text{H}$  NMR and  $^{13}\text{C}$  NMR spectra of 2m

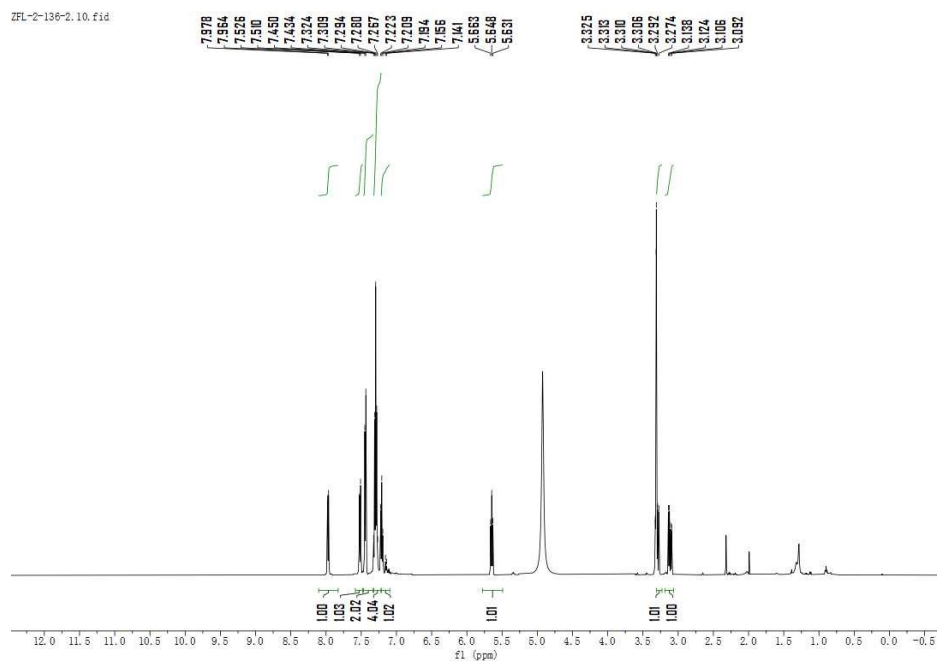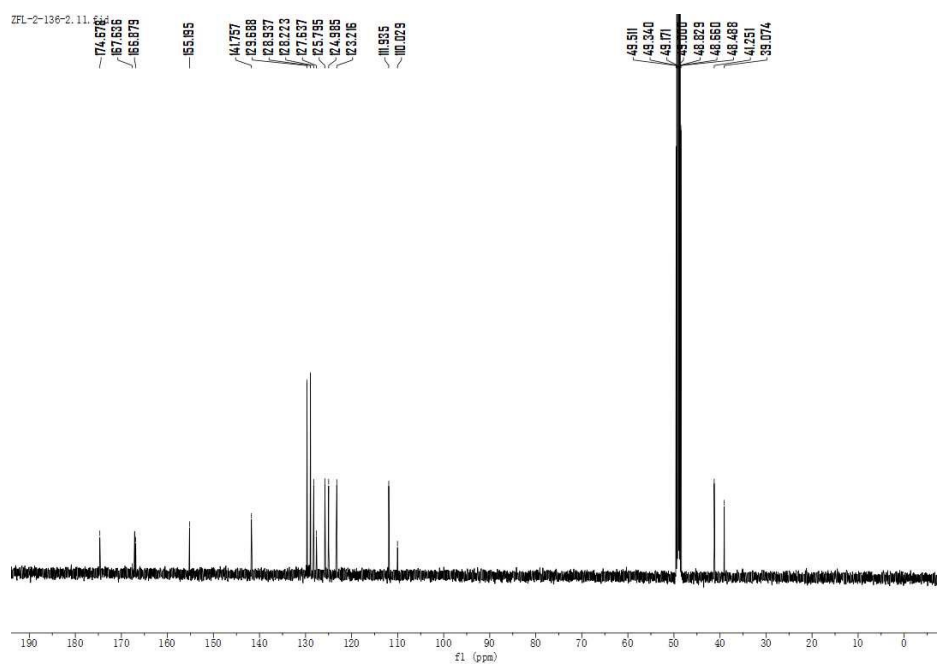

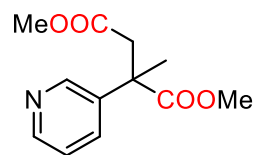

<sup>1</sup>H NMR and <sup>13</sup>C NMR spectra of 2n

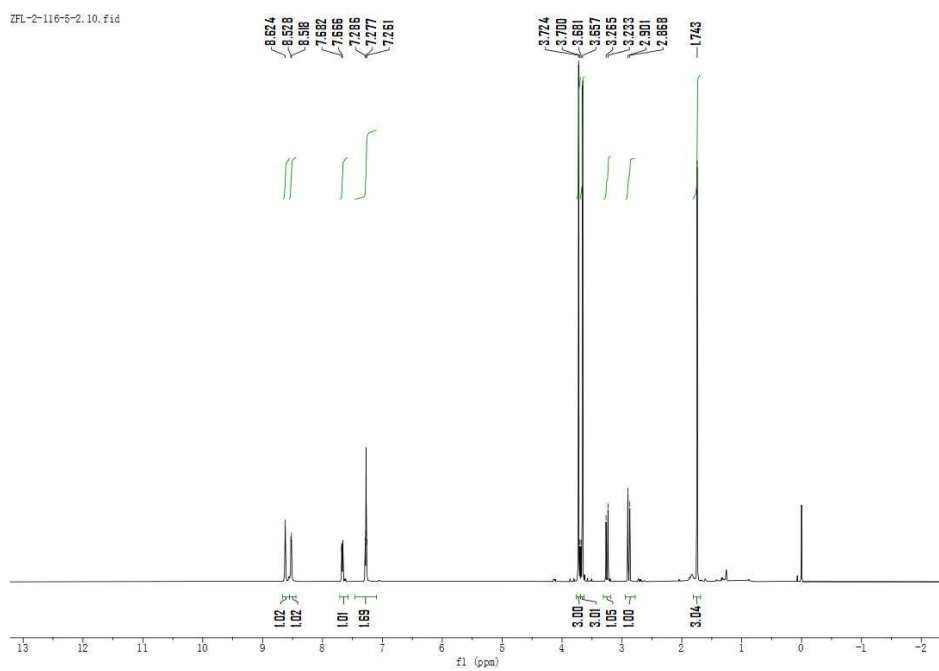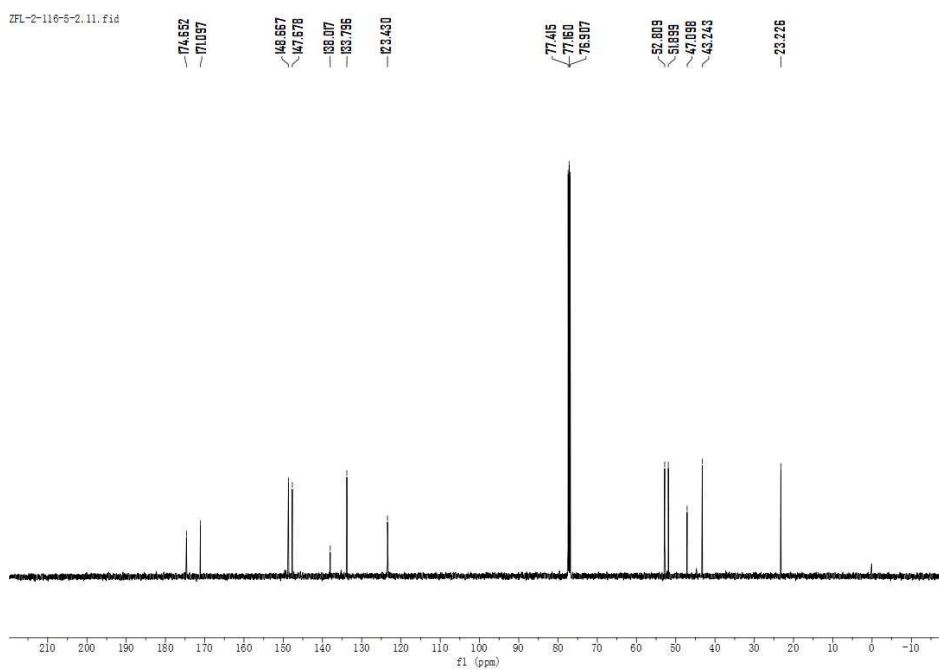

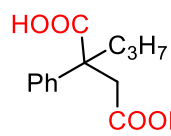

<sup>1</sup>H NMR and <sup>13</sup>C NMR spectra of 2o

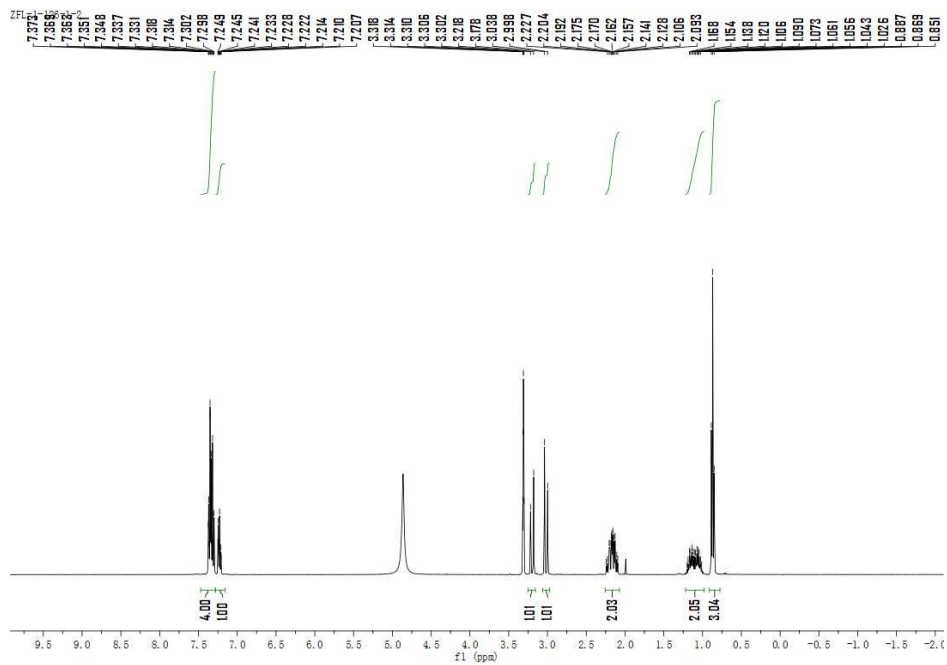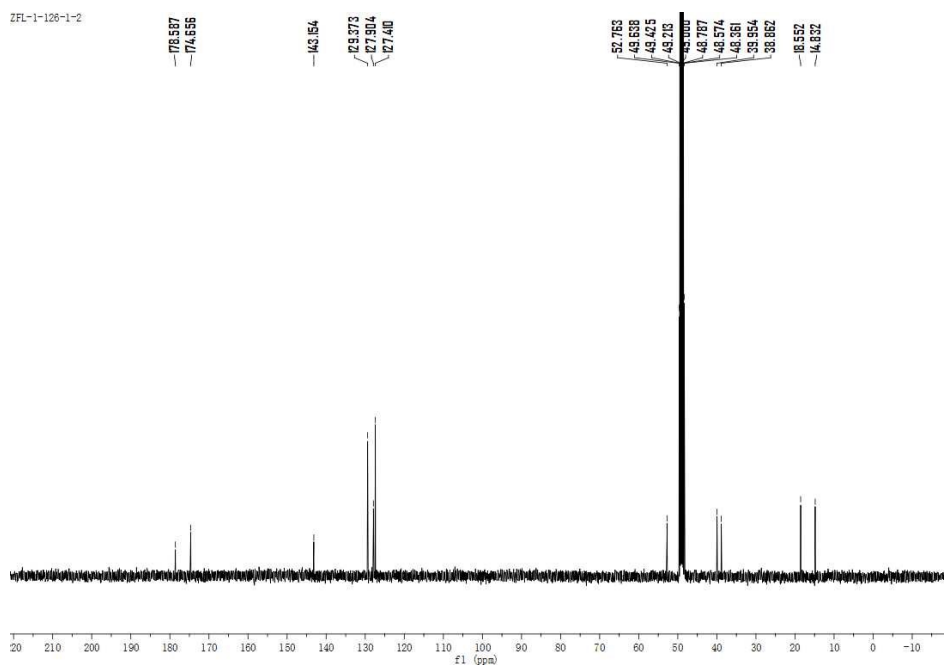

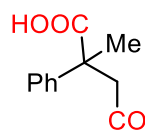

<sup>1</sup>H NMR and <sup>13</sup>C NMR spectra of 2p

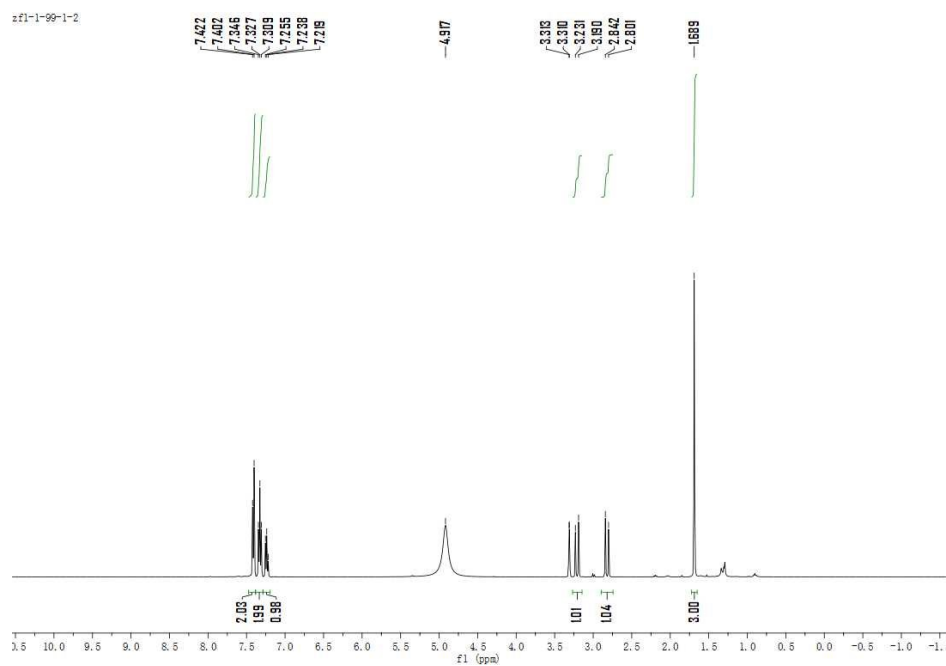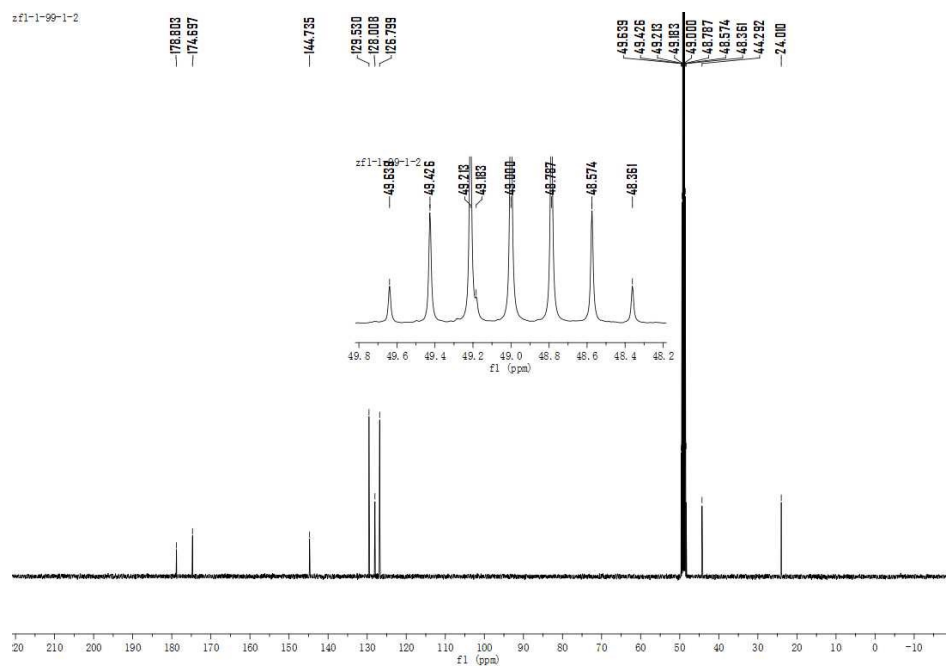

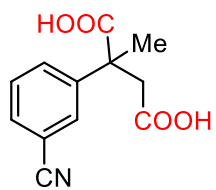

<sup>1</sup>H NMR and <sup>13</sup>C NMR spectra of 2q

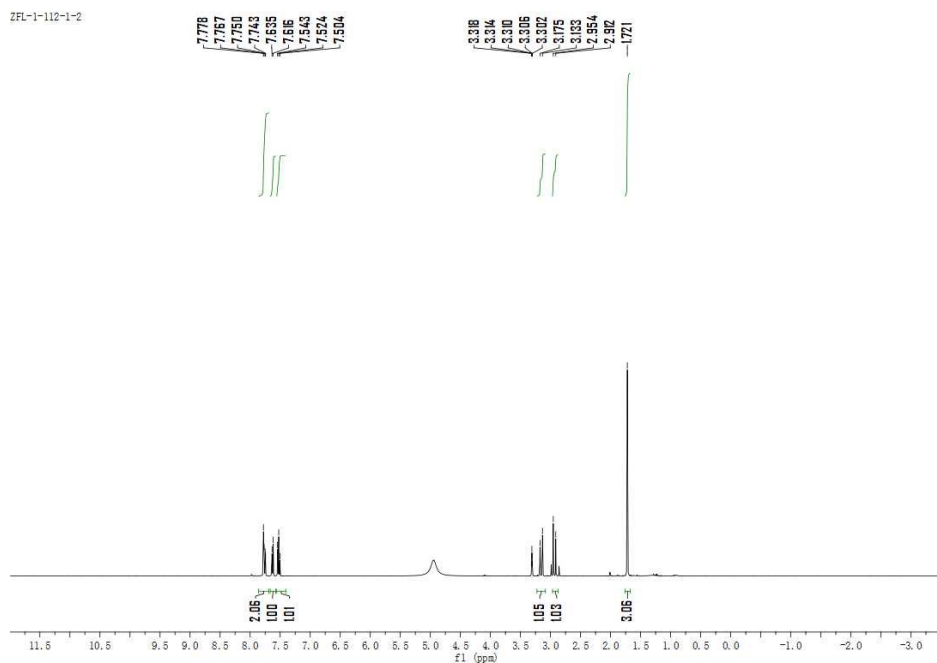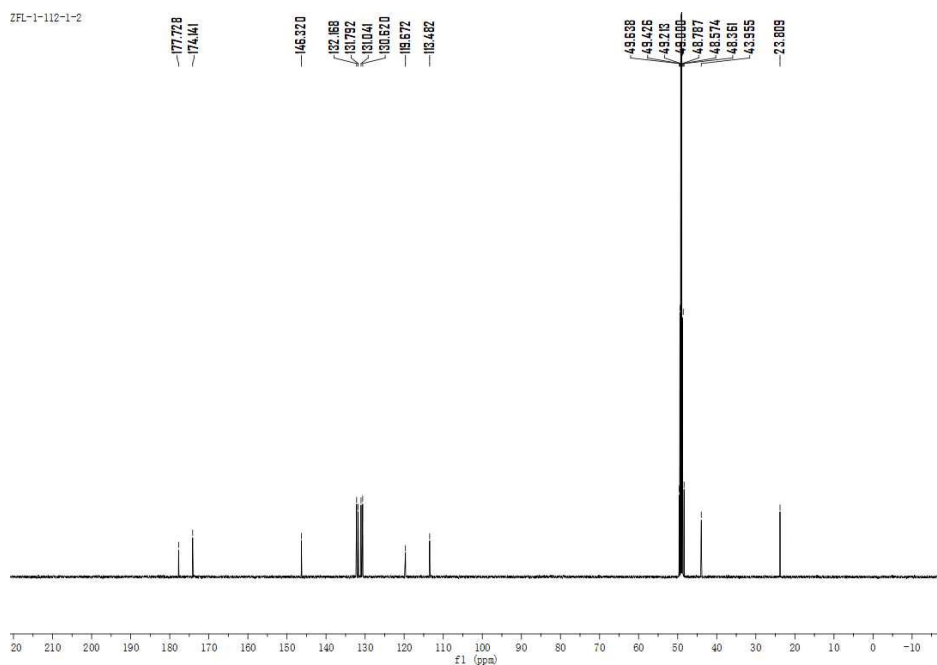

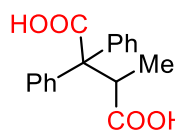

<sup>1</sup>H NMR and <sup>13</sup>C NMR spectra of 2r

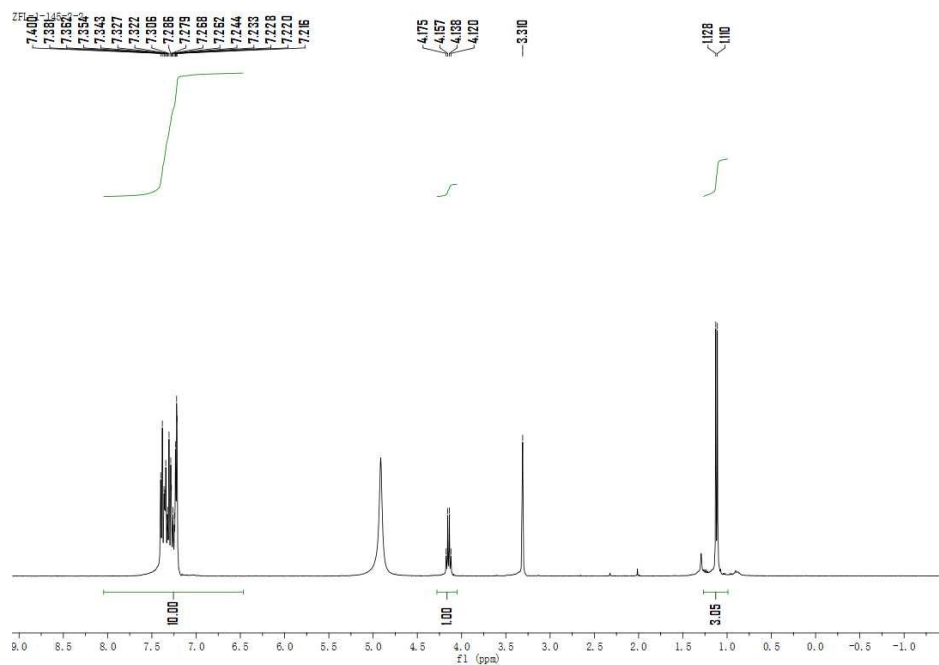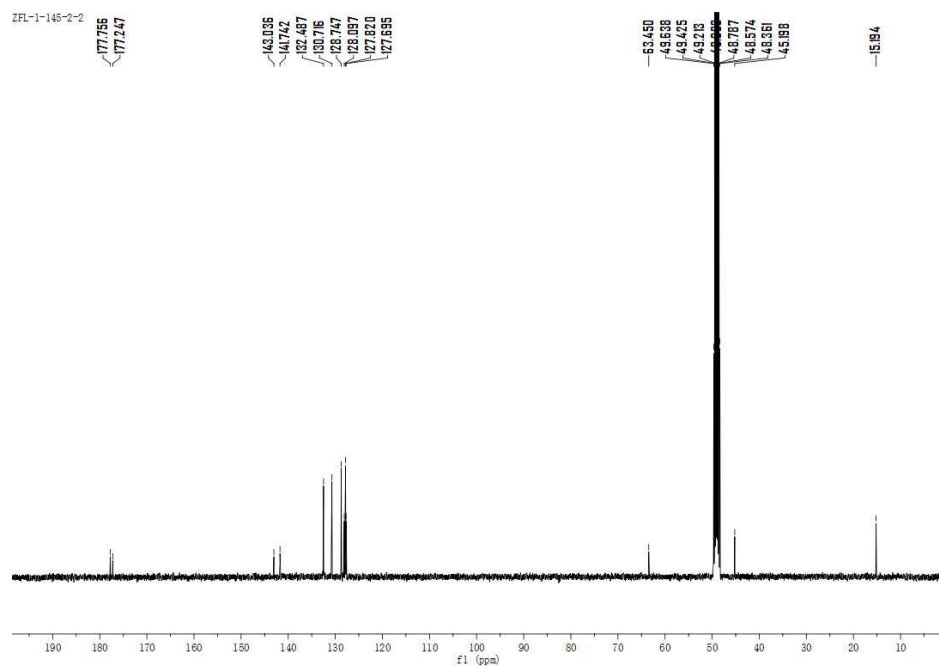

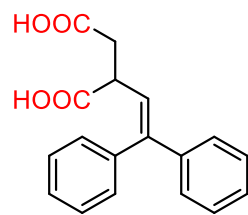

<sup>1</sup>H NMR and <sup>13</sup>C NMR spectra of **2s<sub>a</sub>**

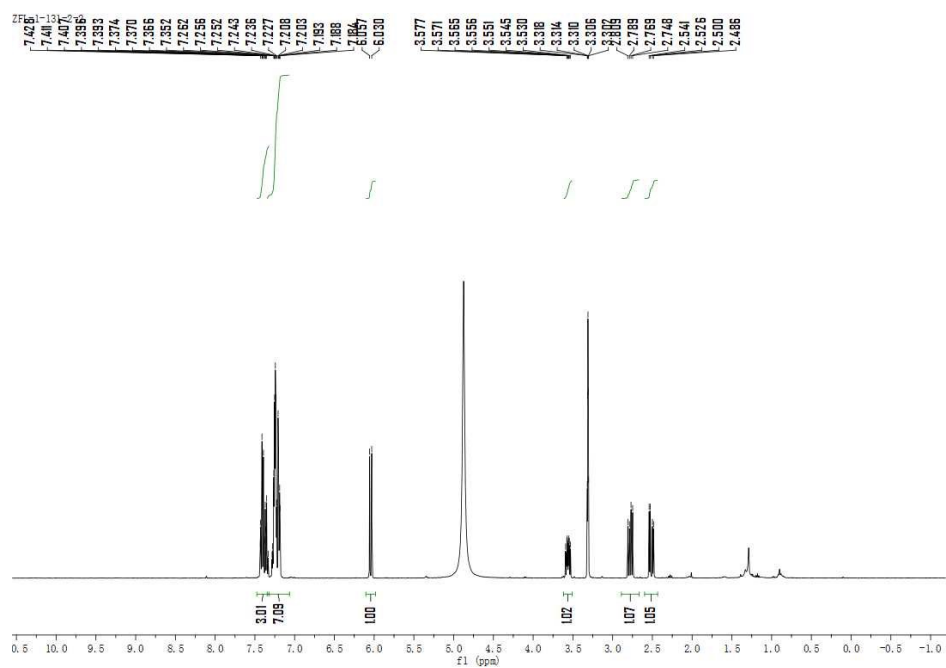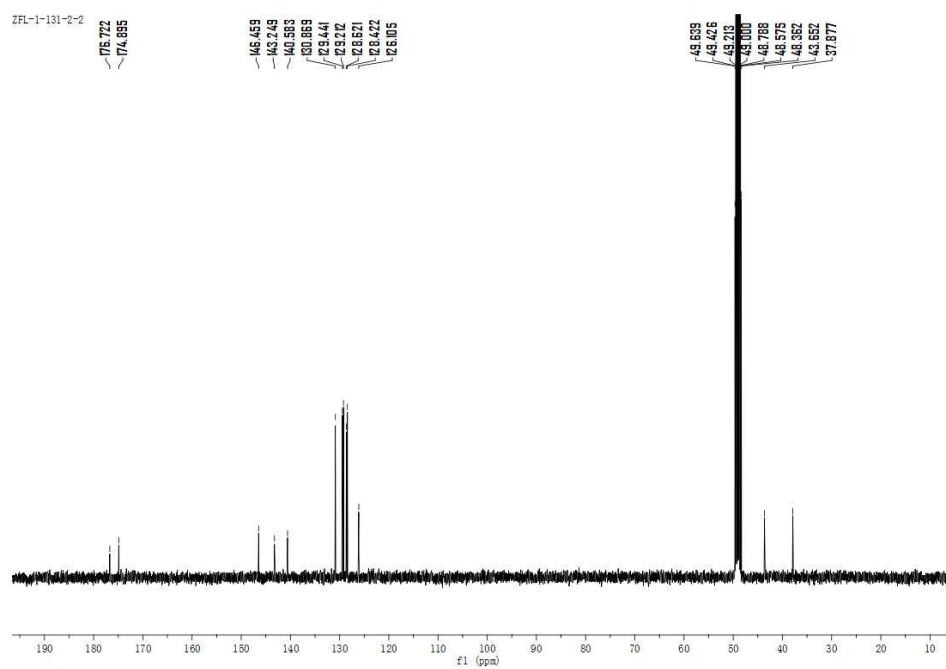

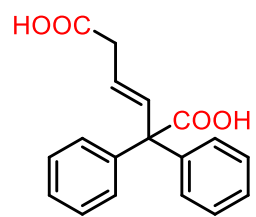

$^1\text{H}$  NMR and  $^{13}\text{C}$  NMR spectra of **2s<sub>b</sub>**

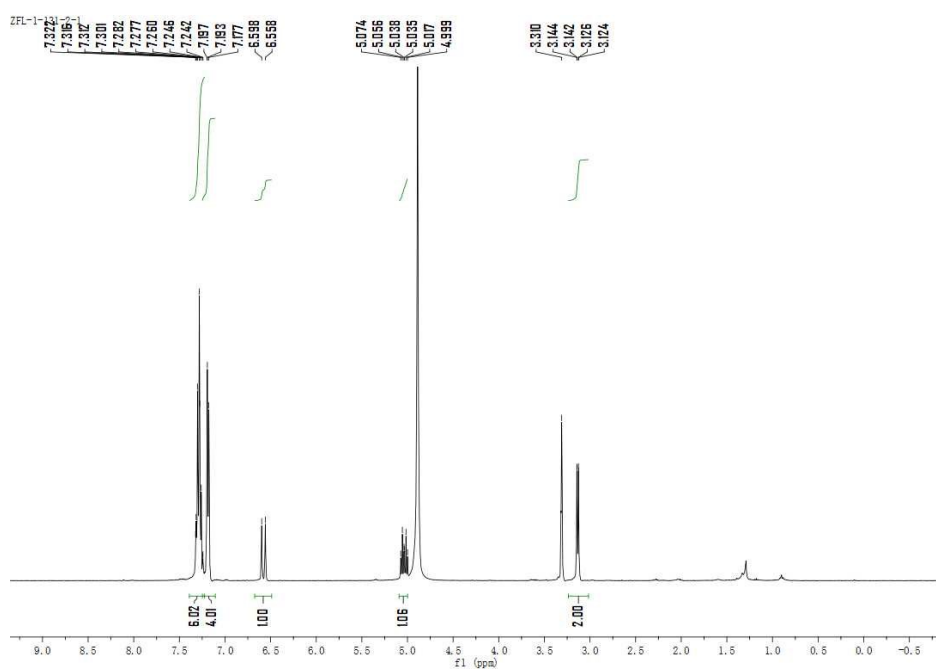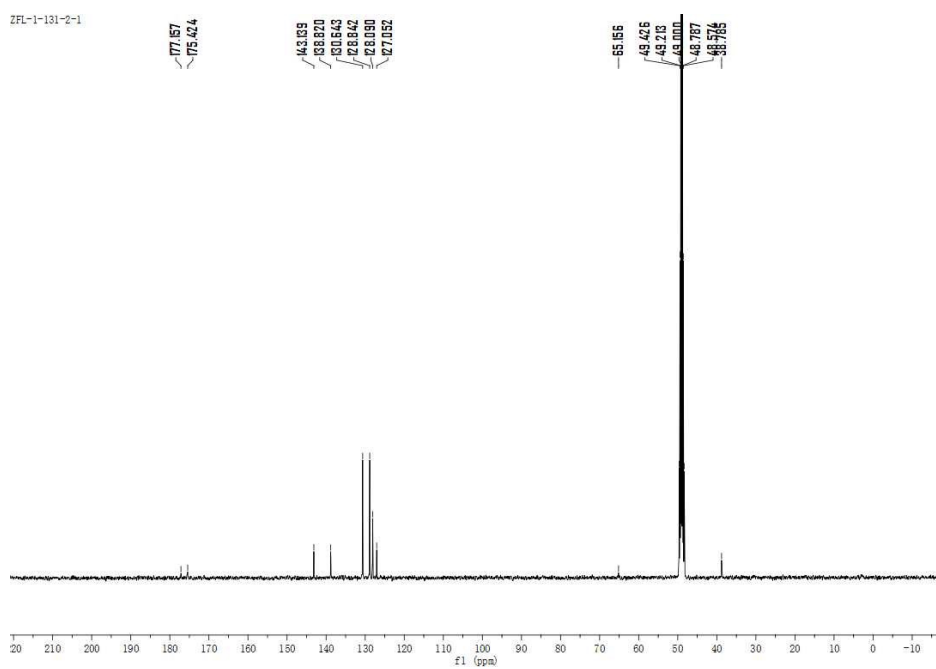

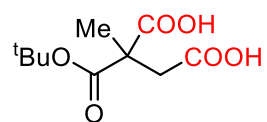

$^1\text{H}$  NMR and  $^{13}\text{C}$  NMR spectra of 2t

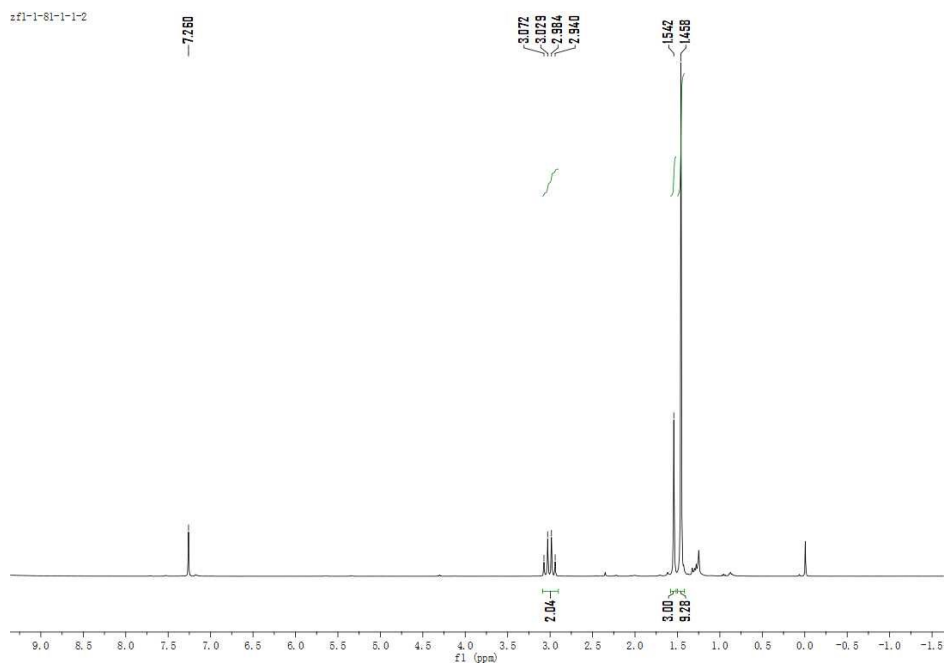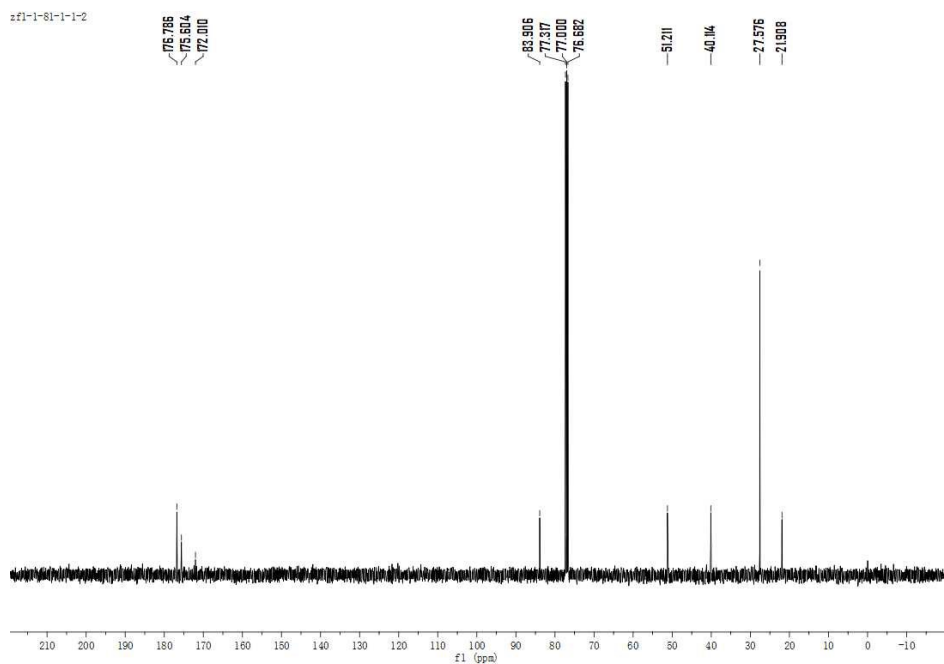

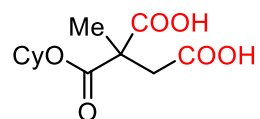

<sup>1</sup>H NMR and <sup>13</sup>C NMR of 2u

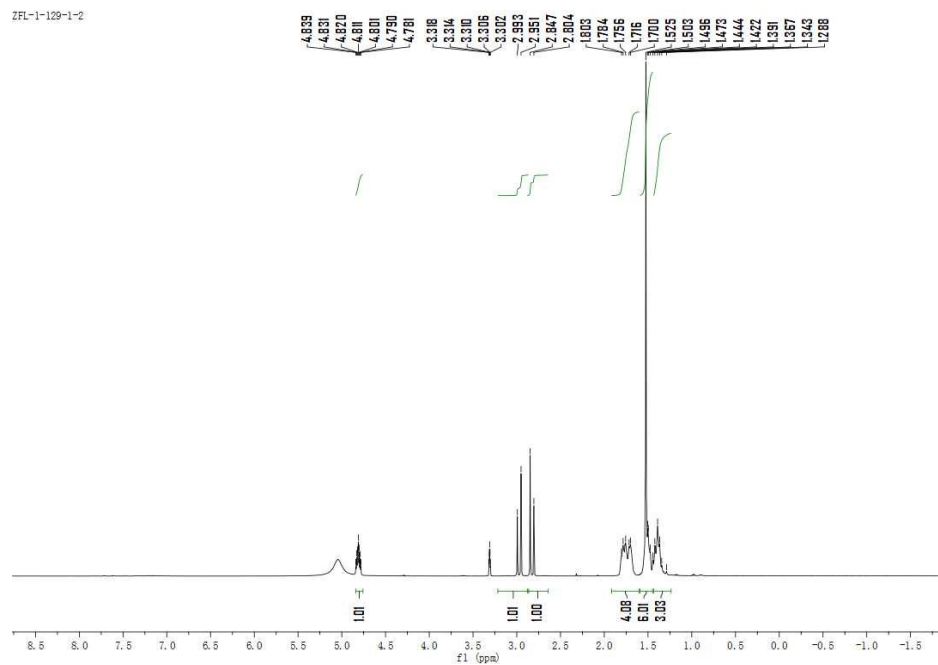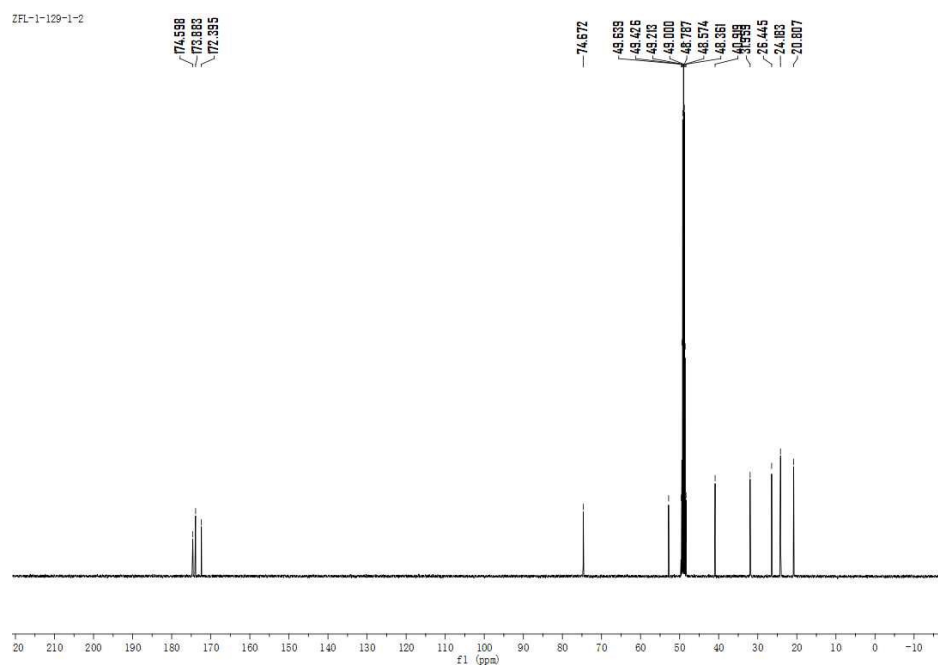

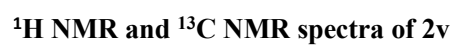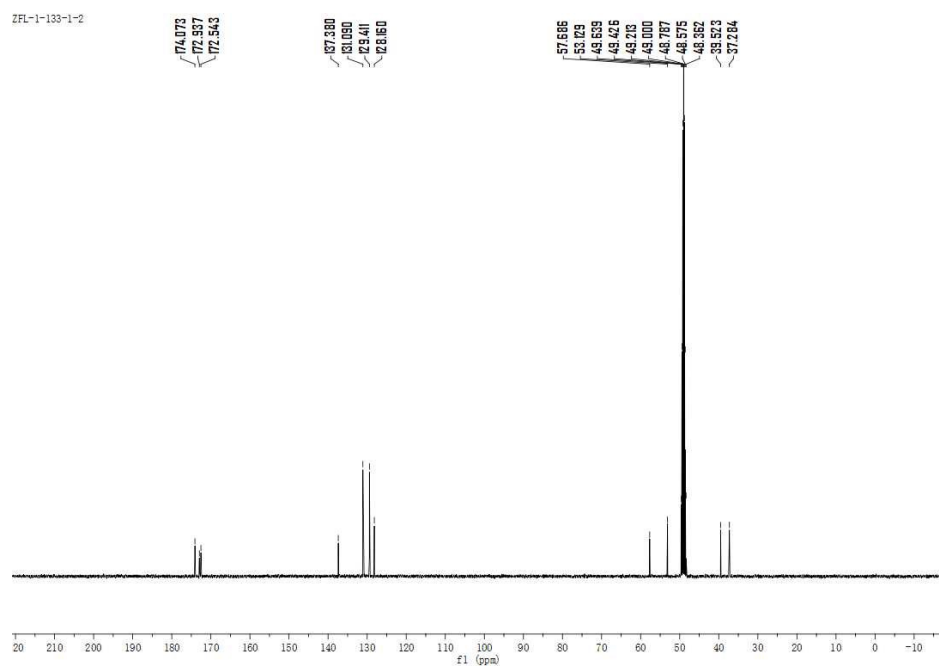

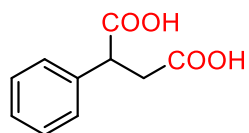

$^1\text{H}$  NMR and  $^{13}\text{C}$  NMR spectra of 4a

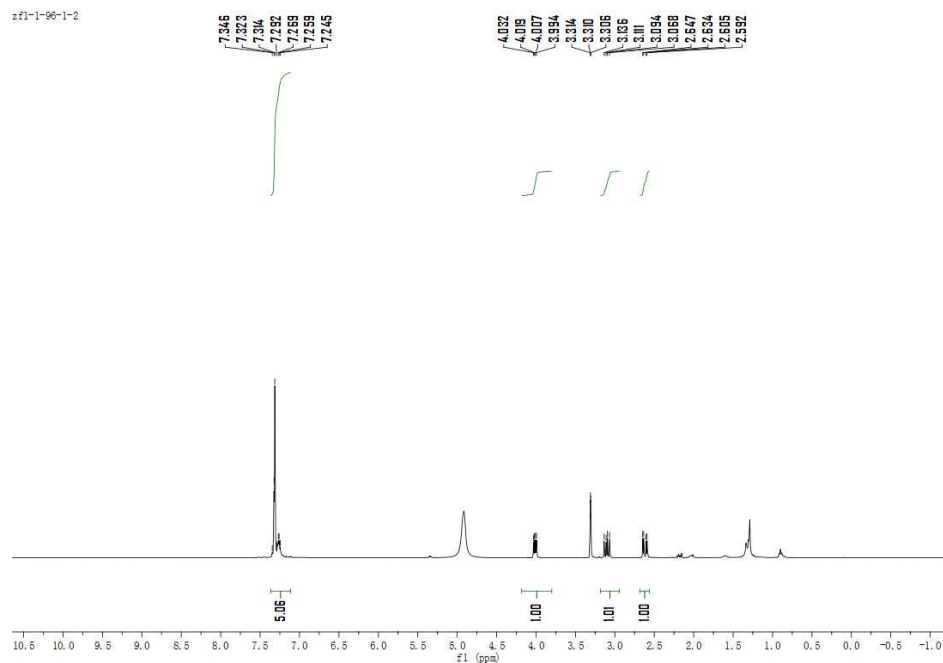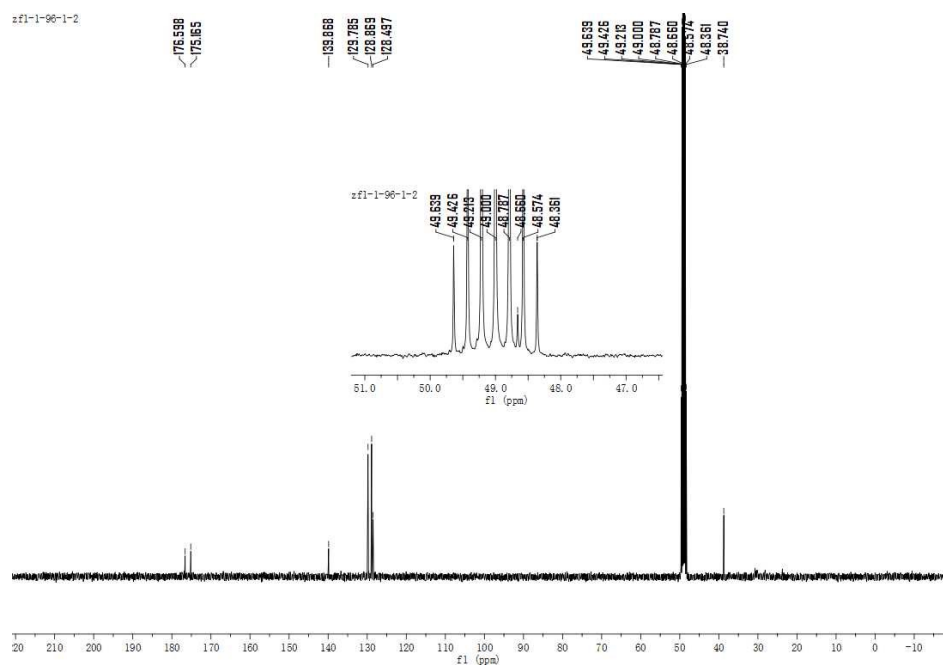

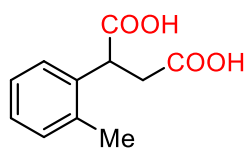

<sup>1</sup>H NMR and <sup>13</sup>C NMR spectra of 4b

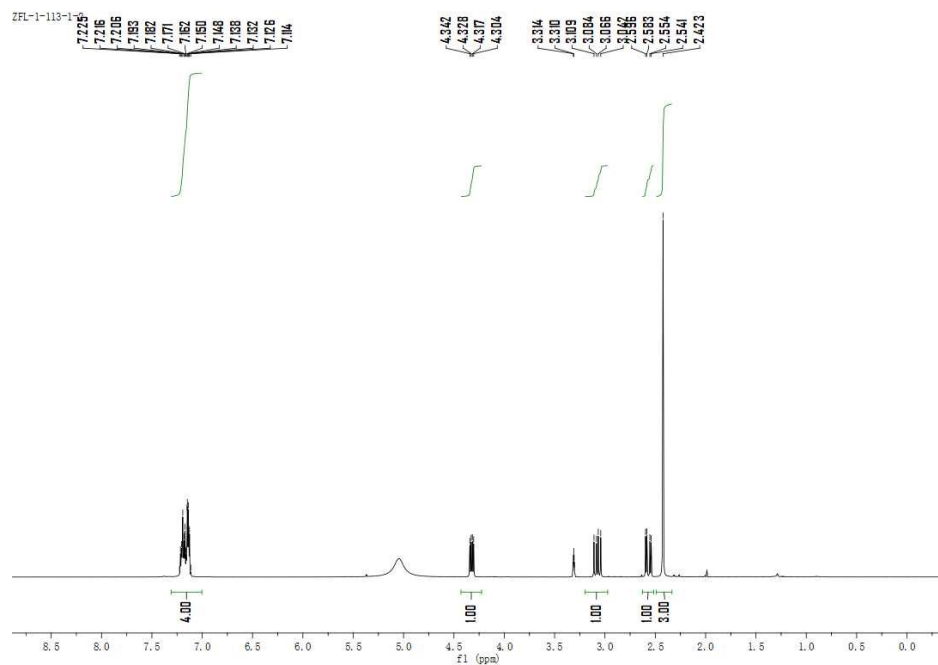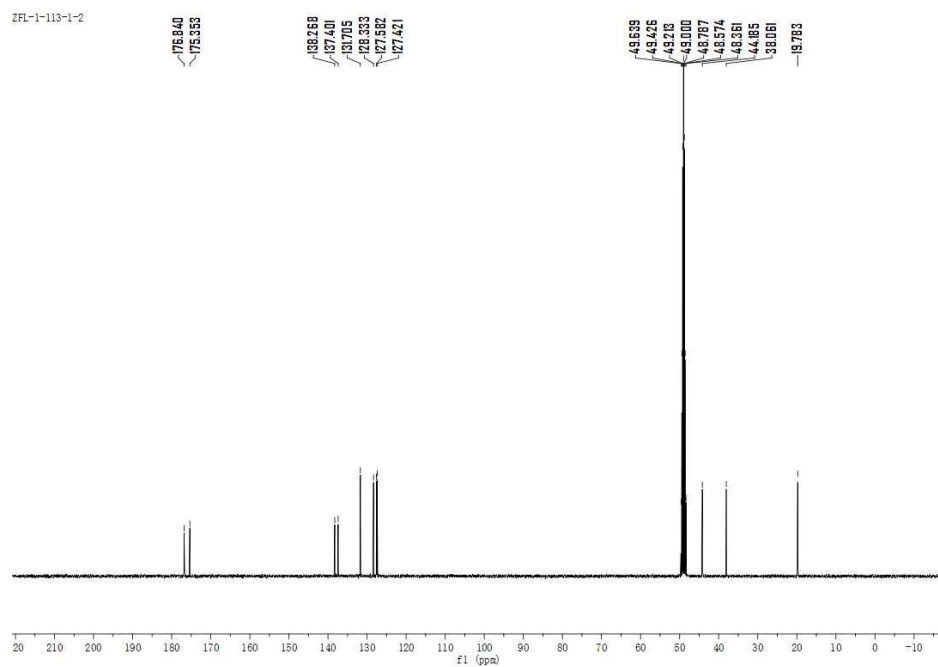

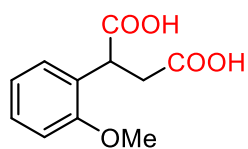

$^1\text{H}$  NMR and  $^{13}\text{C}$  NMR spectra of 4c

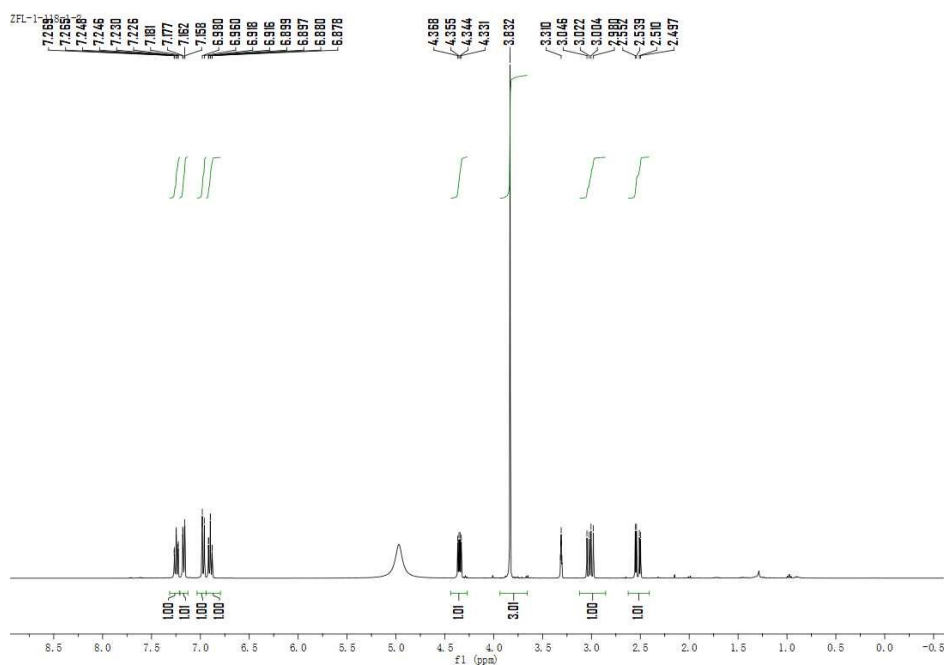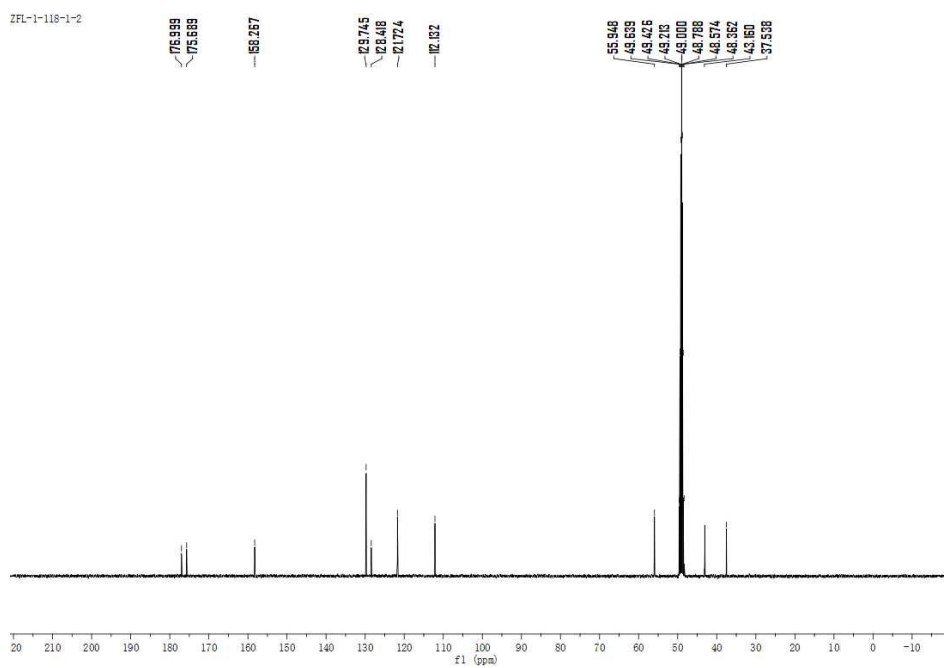

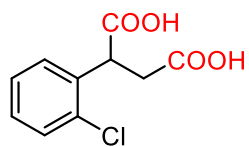

$^1\text{H}$  NMR and  $^{13}\text{C}$  NMR spectra of 4d

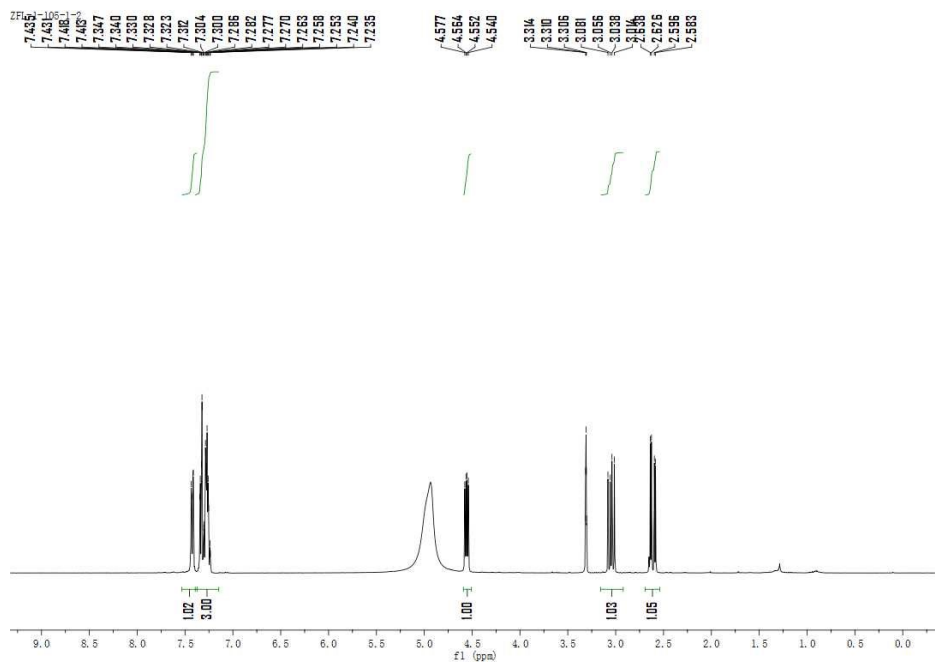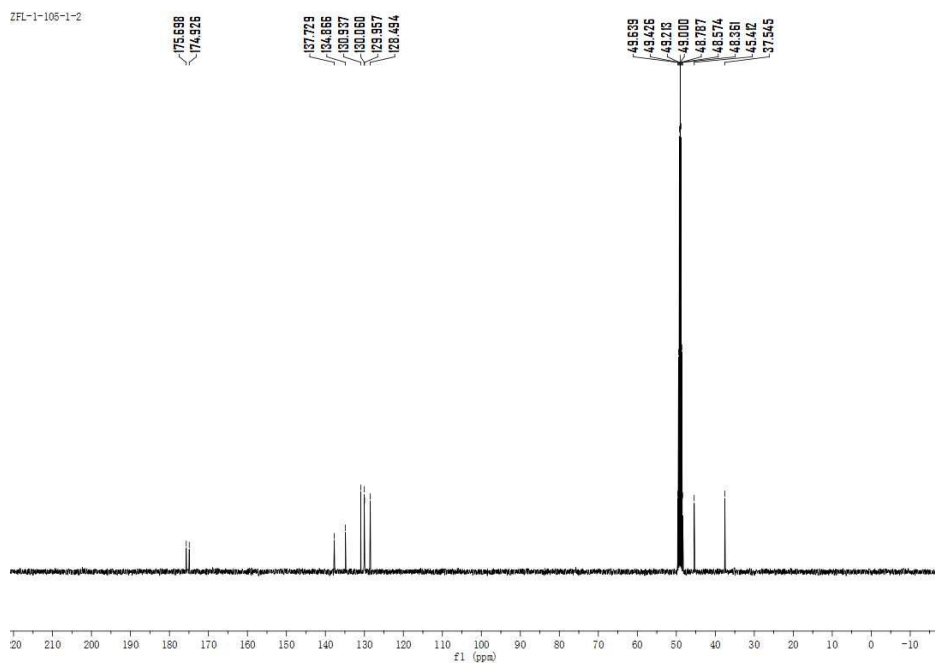

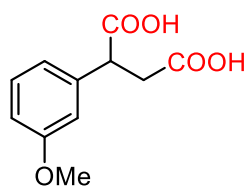

<sup>1</sup>H NMR and <sup>13</sup>C NMR spectra of 4e

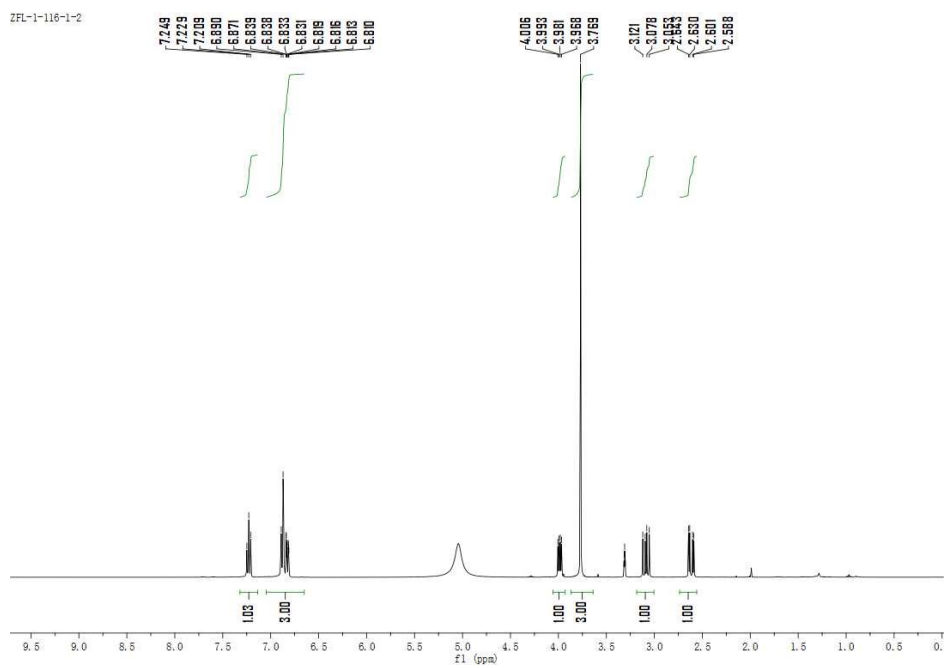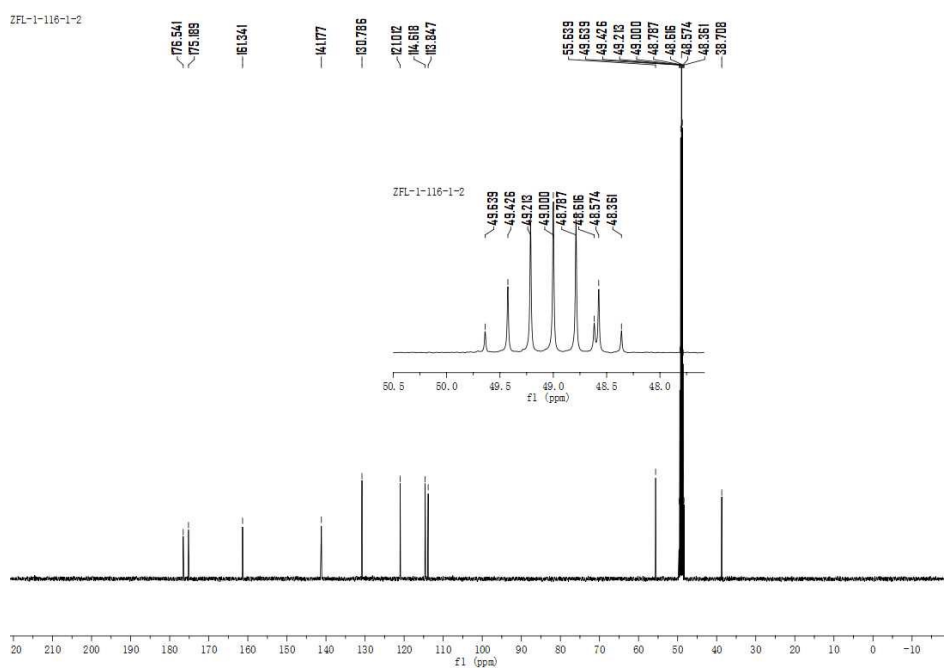

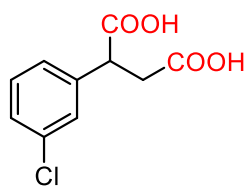

<sup>1</sup>H NMR and <sup>13</sup>C NMR spectra of 4f

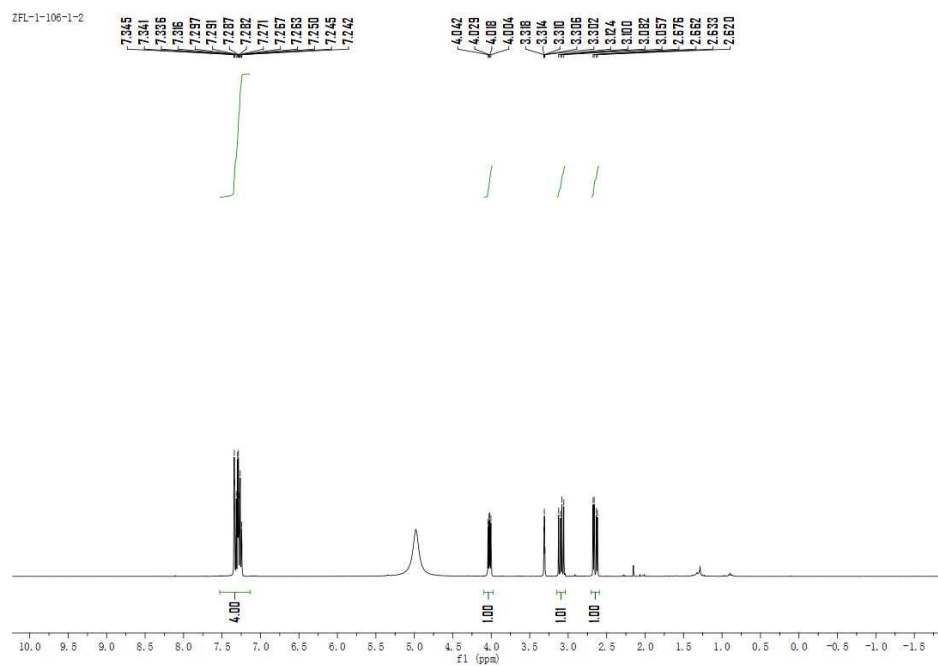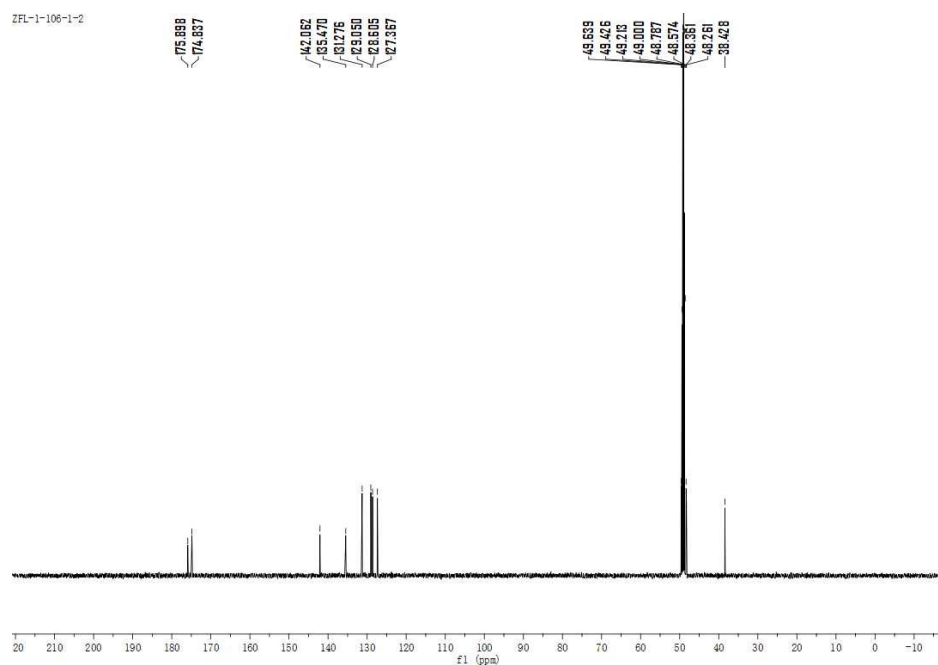

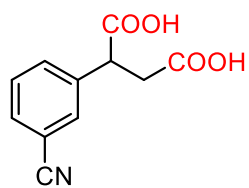

<sup>1</sup>H NMR and <sup>13</sup>C NMR spectra of 4g

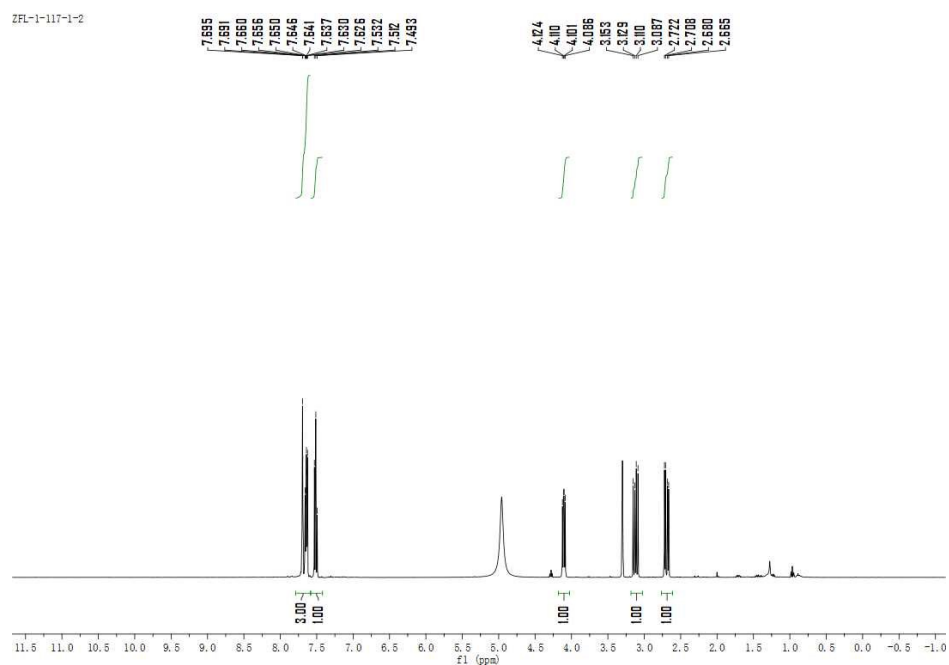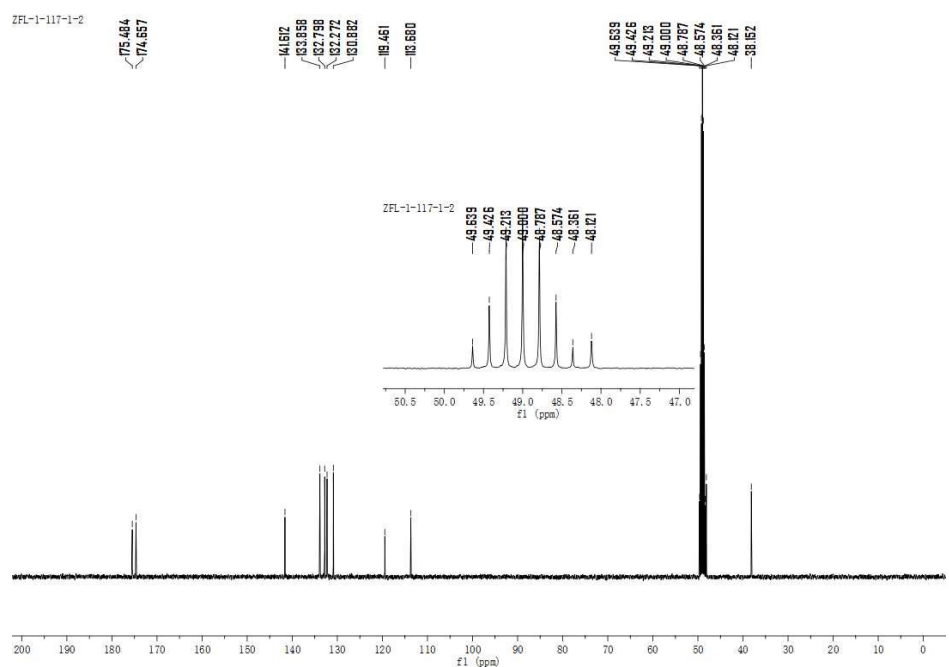

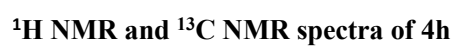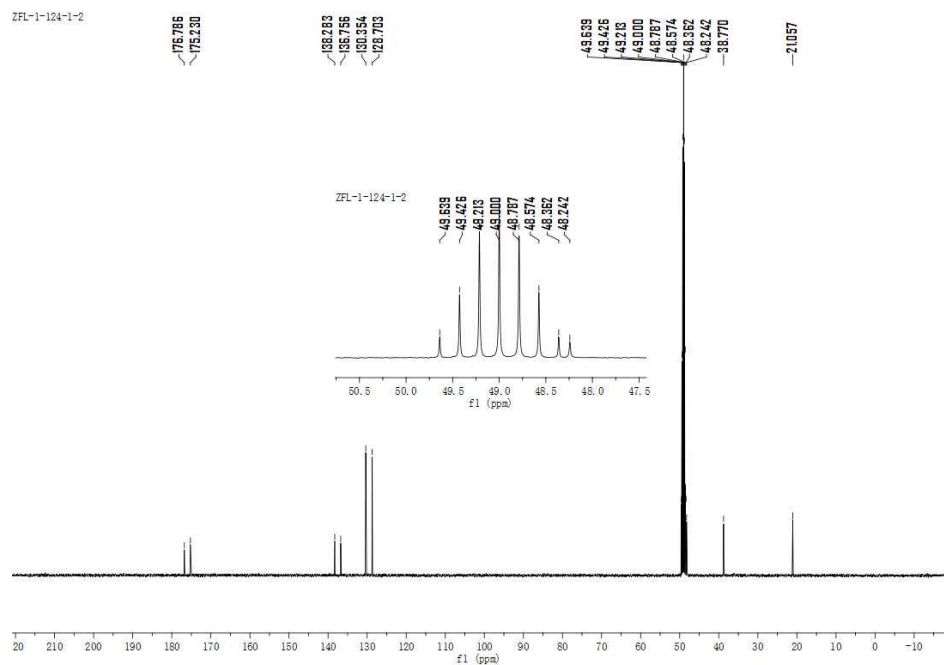

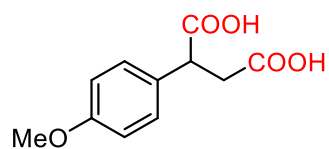

$^1\text{H}$  NMR and  $^{13}\text{C}$  NMR spectra of 4i

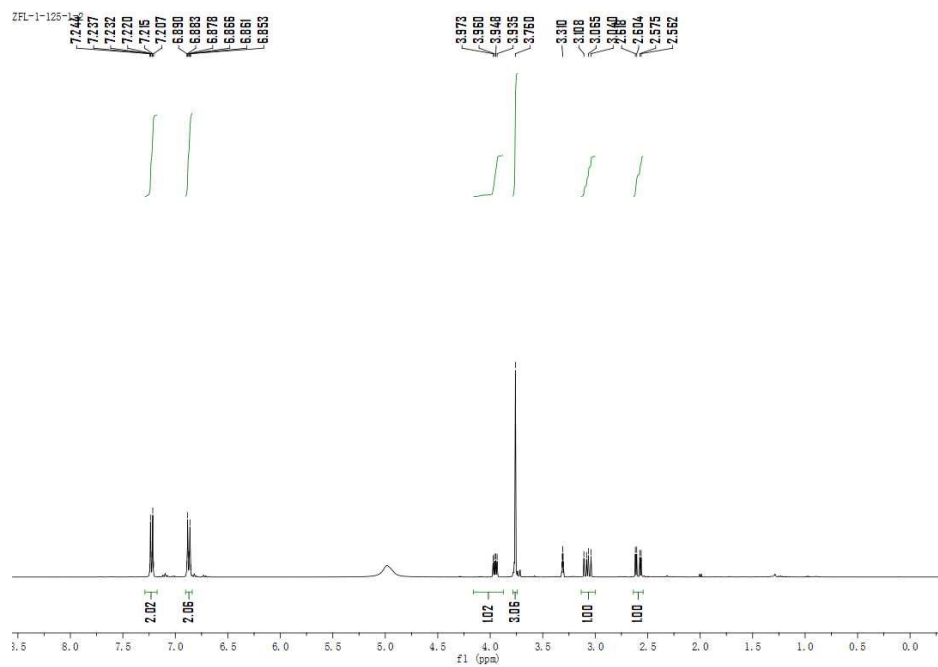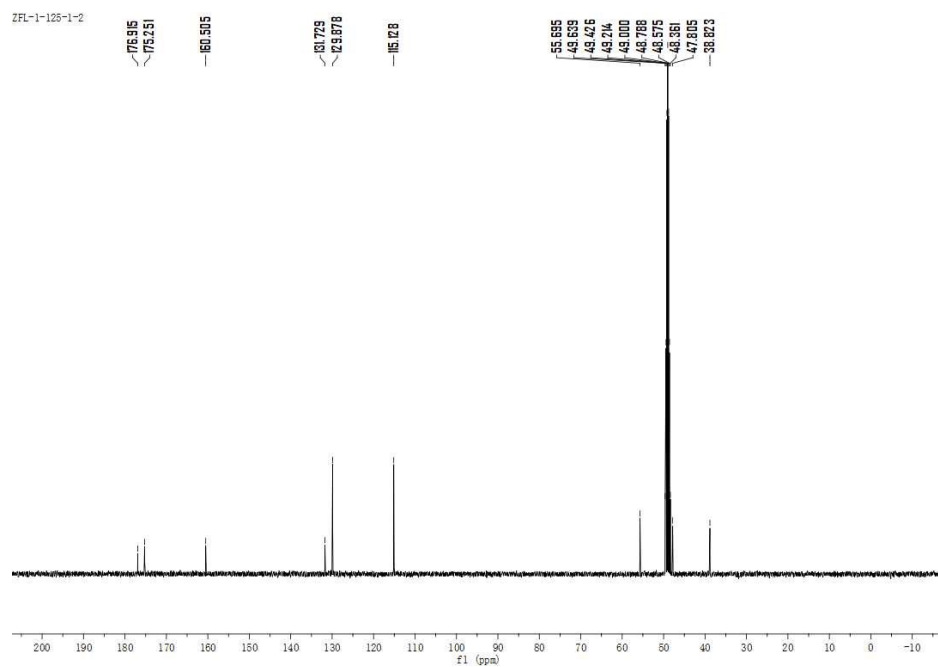

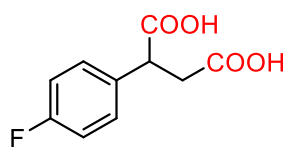

$^1\text{H}$  NMR and  $^{13}\text{C}$  NMR, DEPT-135,  $^{19}\text{F}$  NMR spectra of 4j

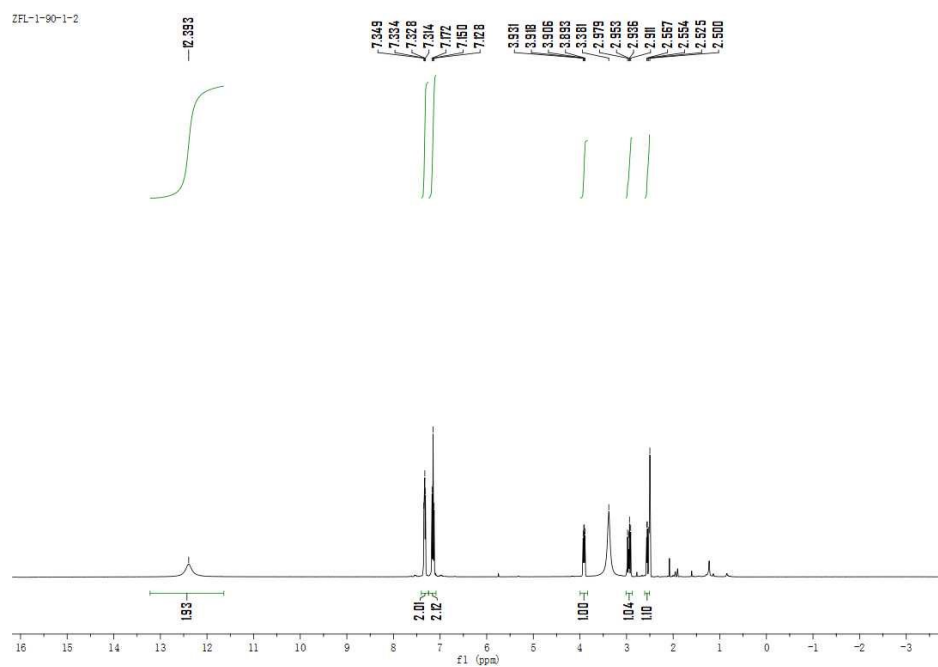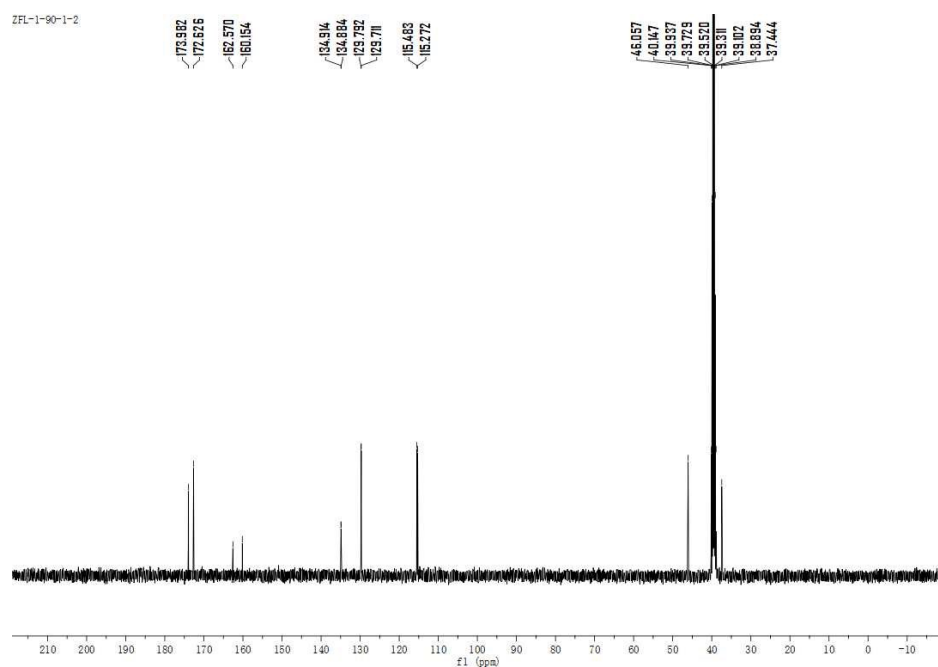

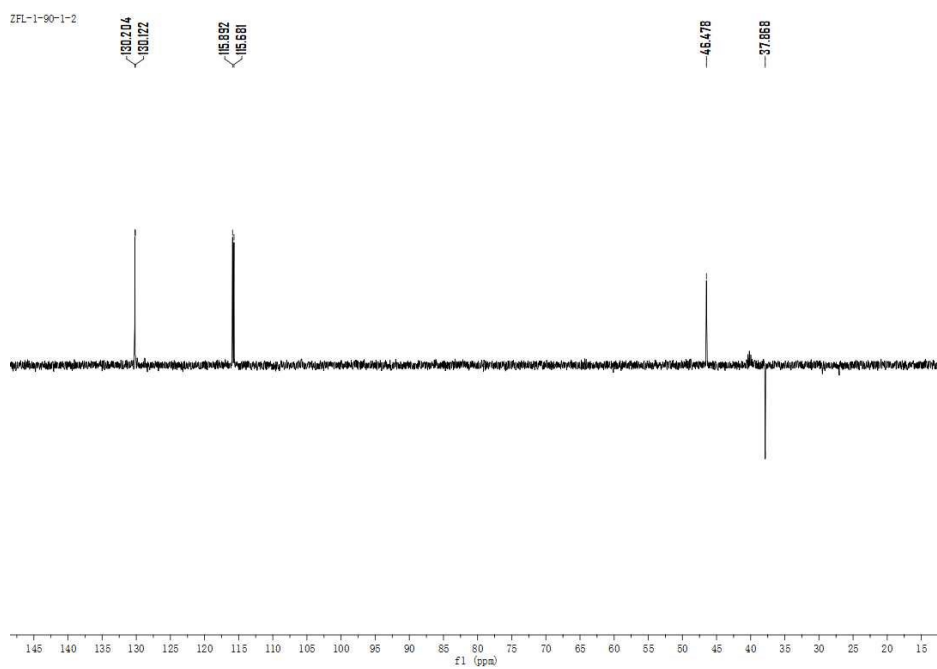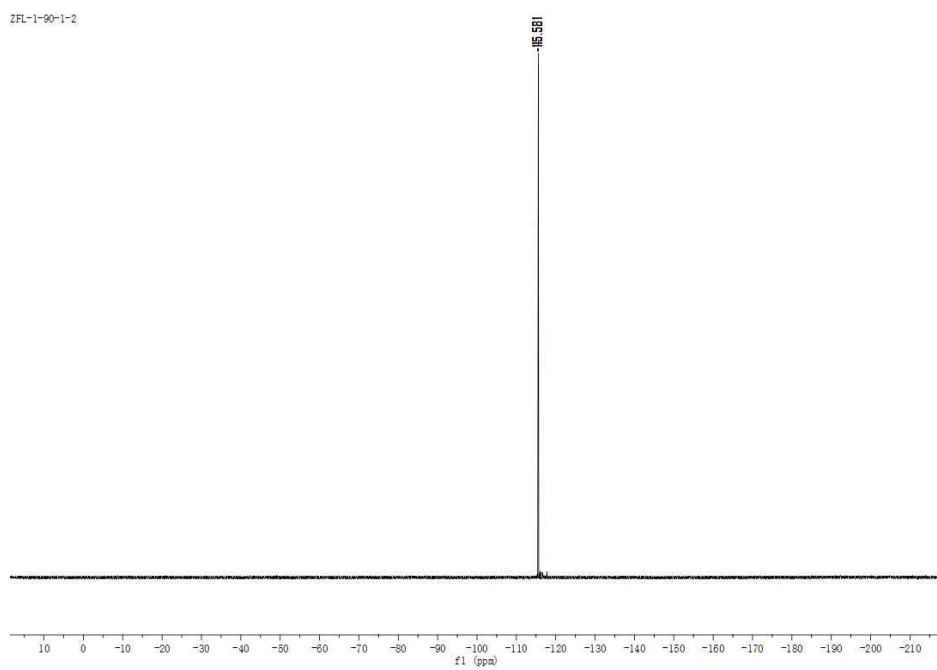

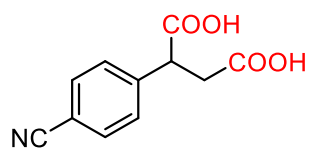

$^1\text{H}$  NMR and  $^{13}\text{C}$  NMR spectra of 4k

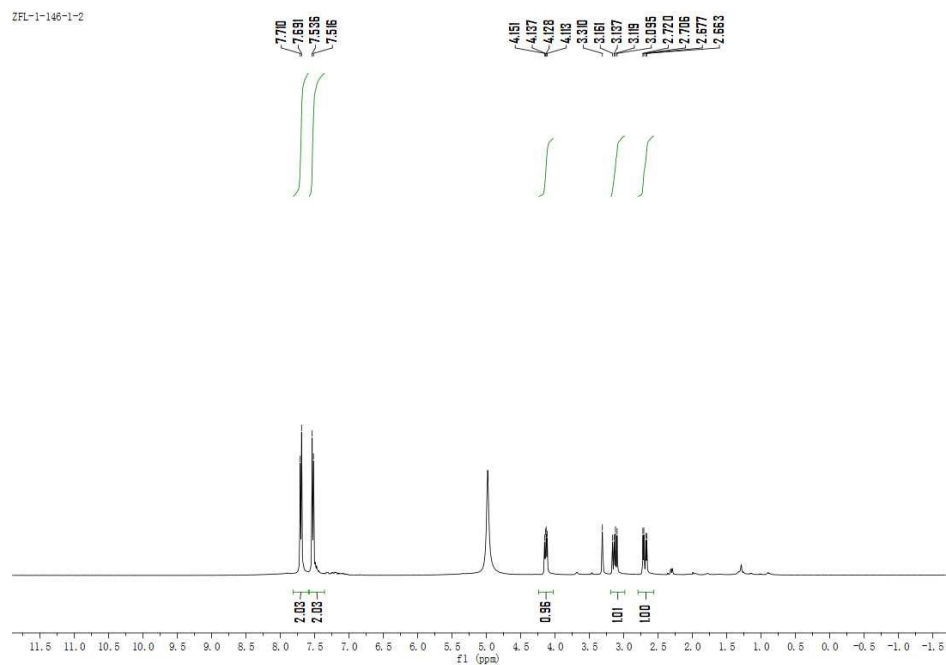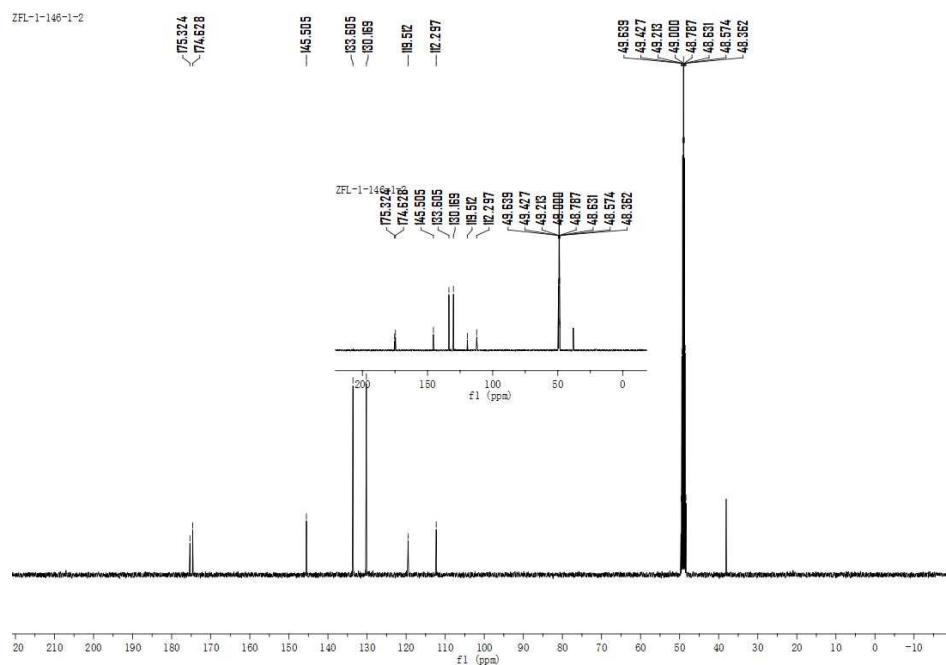

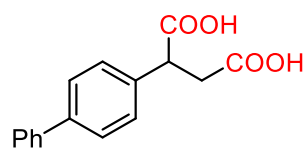

$^1\text{H}$  NMR and  $^{13}\text{C}$  NMR spectra of 4l

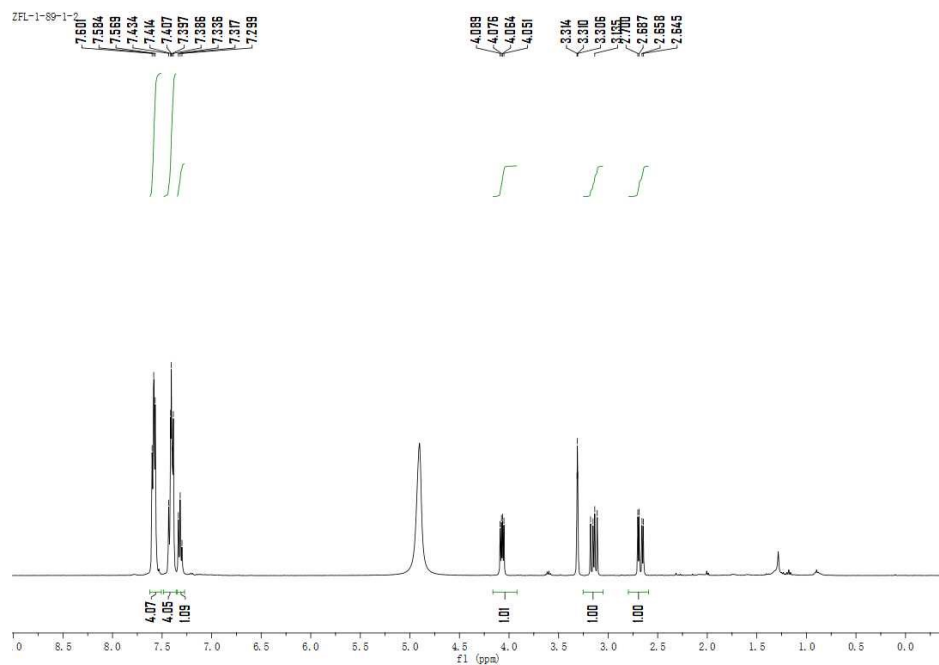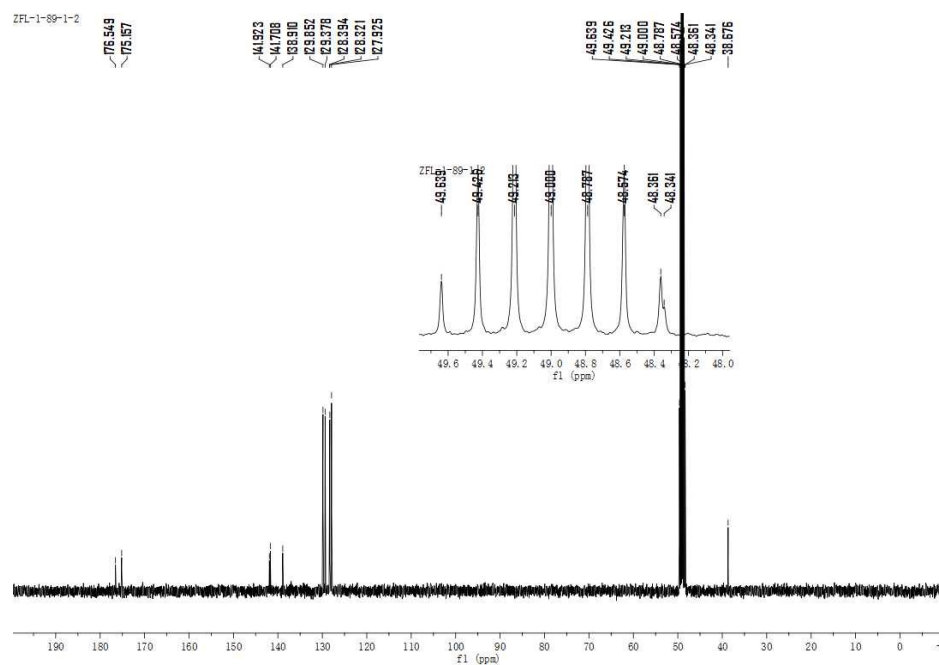

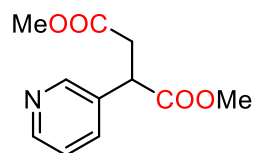

<sup>1</sup>H NMR and <sup>13</sup>C NMR spectra of 4m

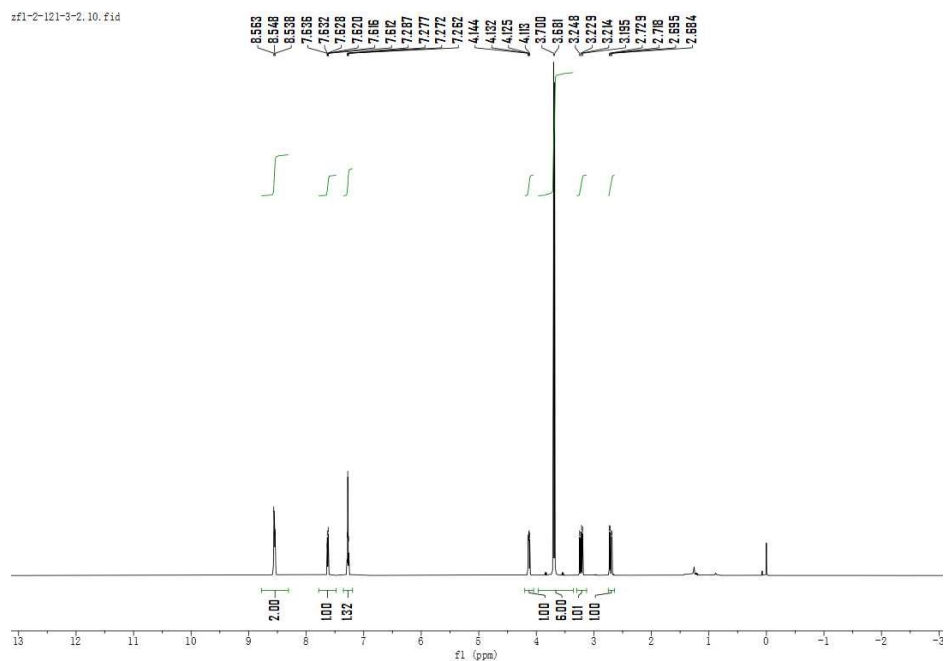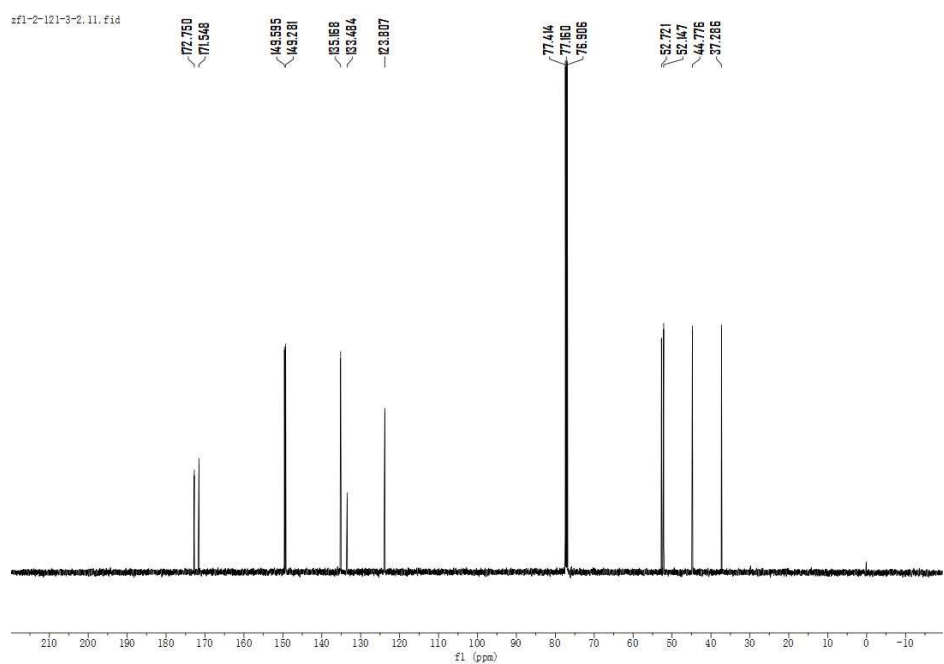

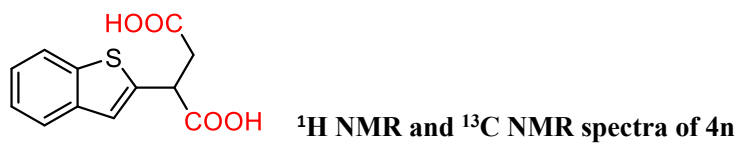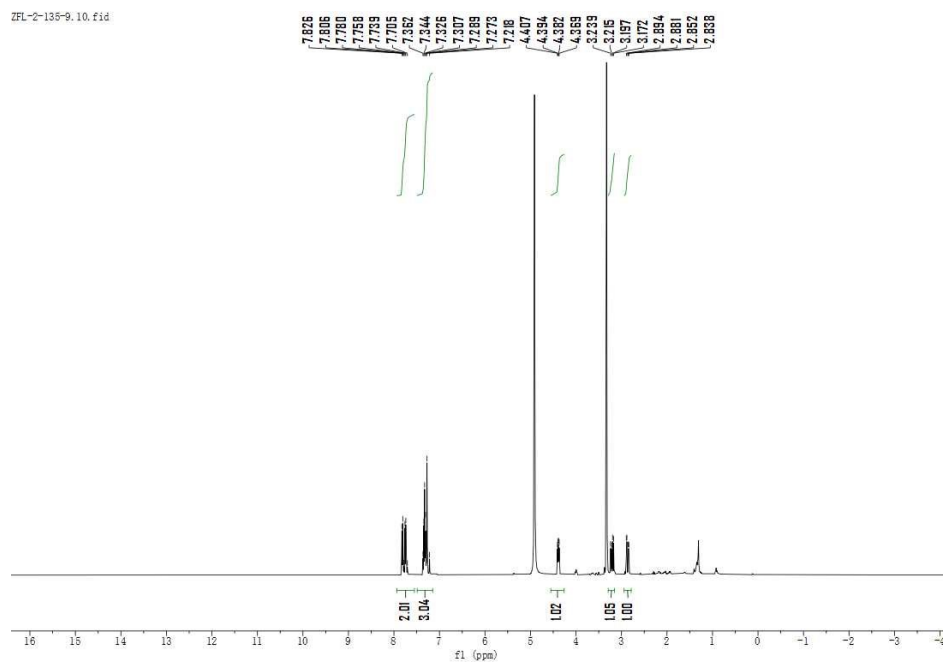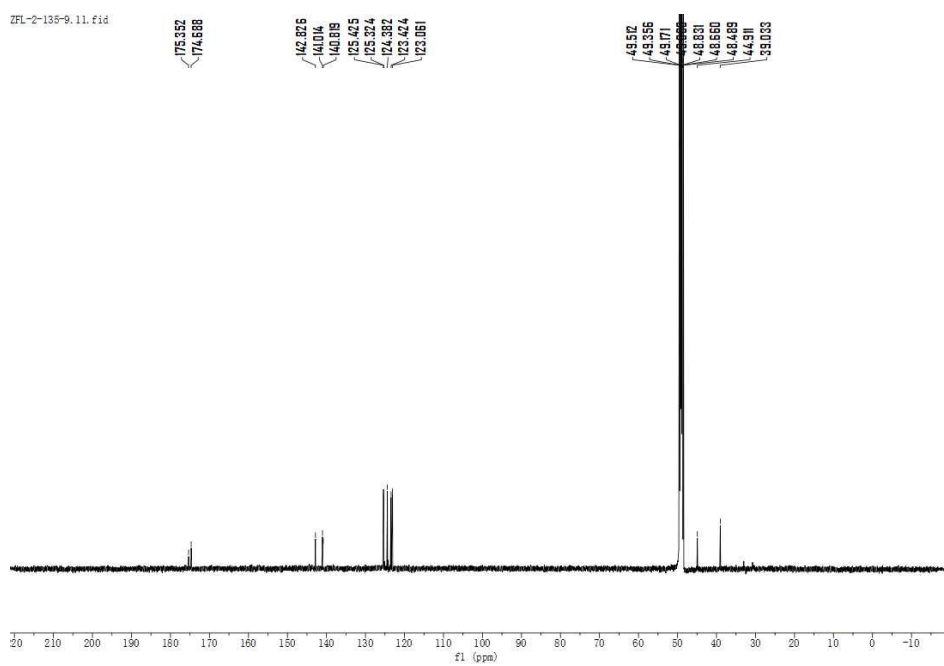

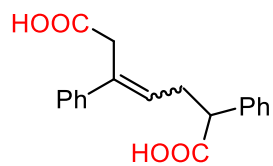

$^1\text{H}$  NMR and  $^{13}\text{C}$  NMR spectra of 6

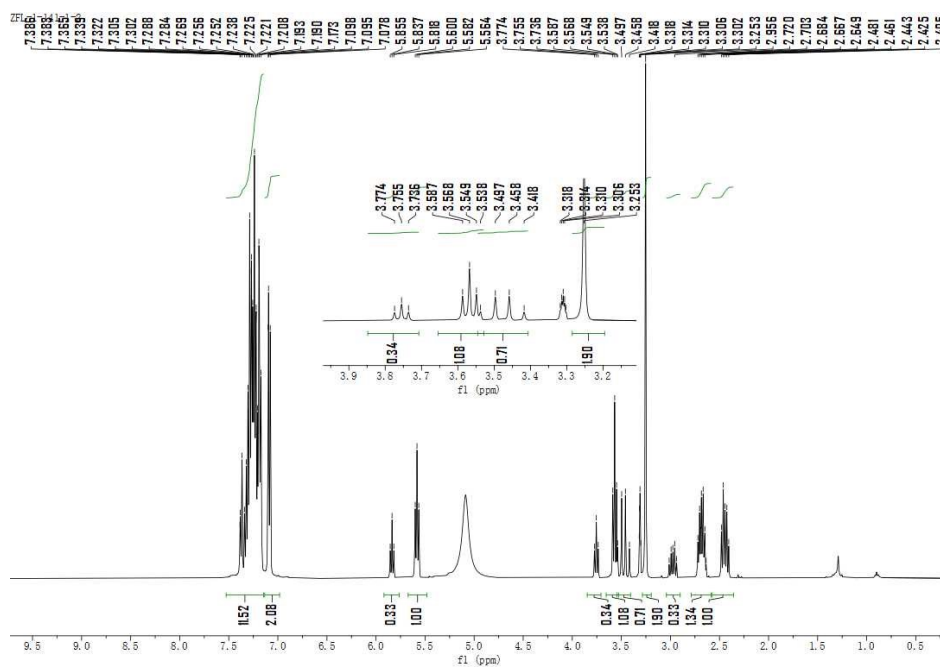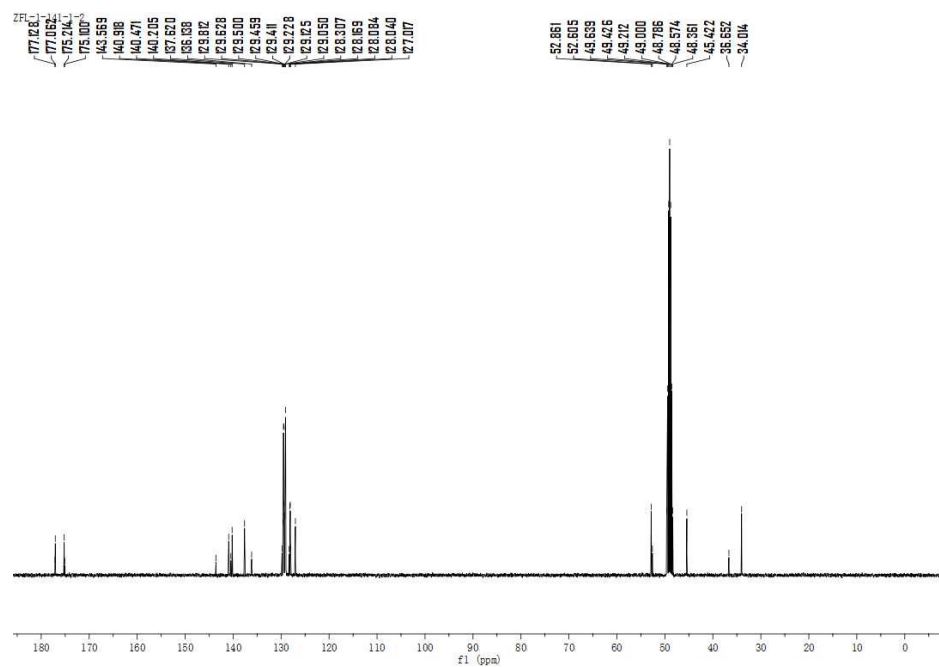

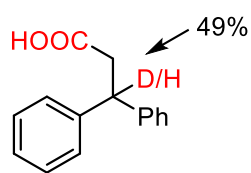

$^1\text{H}$  NMR and  $^{13}\text{C}$  NMR spectra of 2a<sub>H</sub>-DH

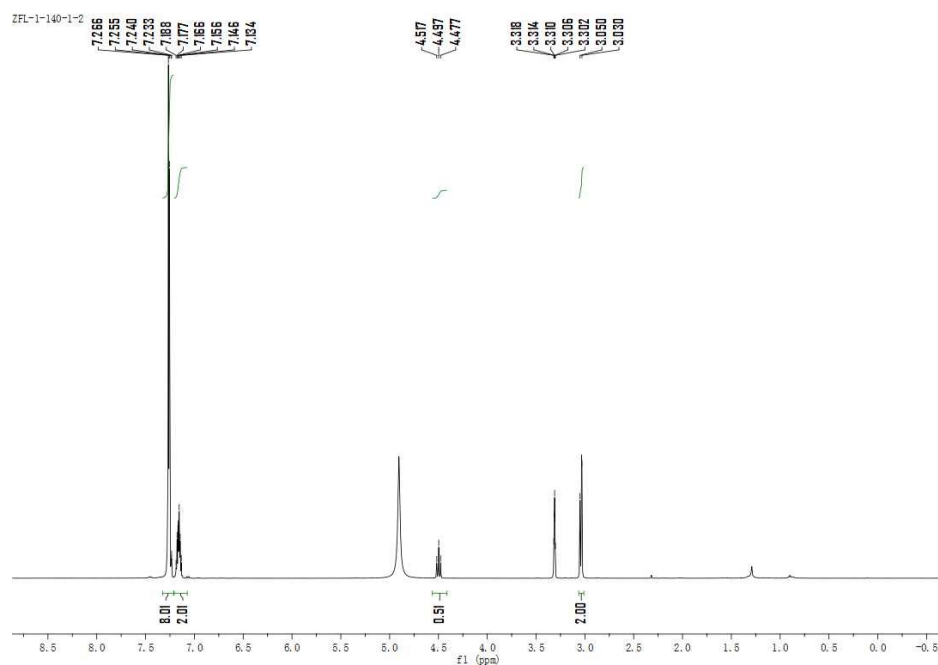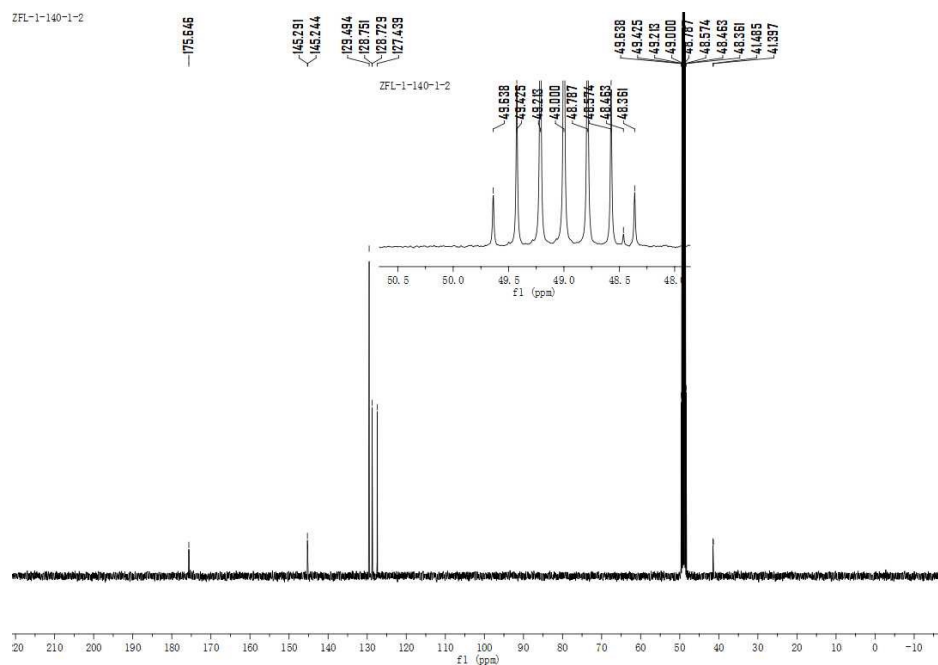

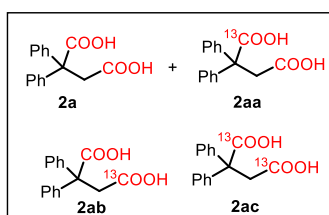

$^1\text{H}$  NMR and  $^{13}\text{C}$  NMR spectra of 2a+(2aa/2ab)+2ac

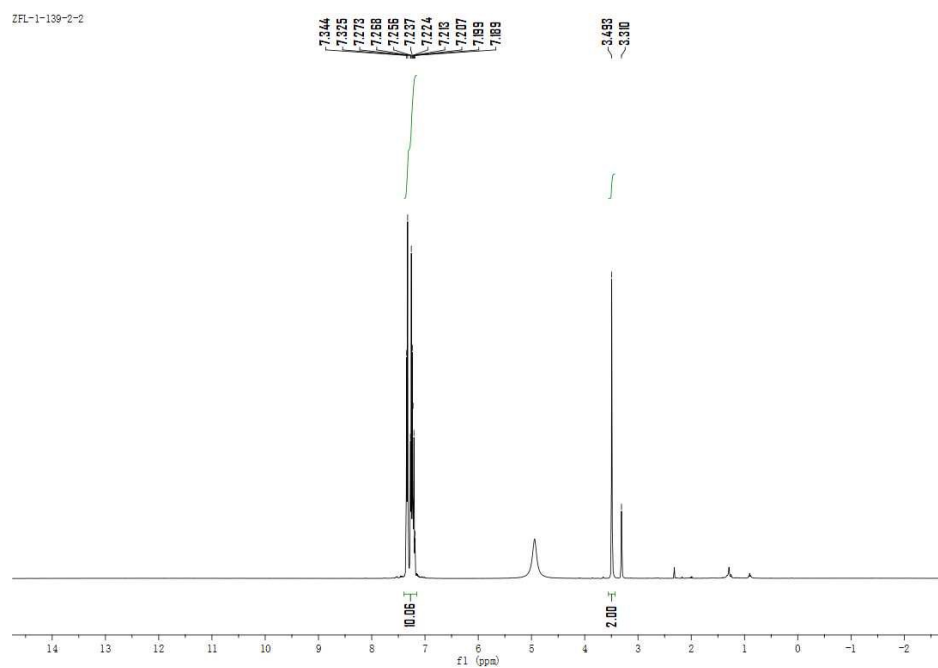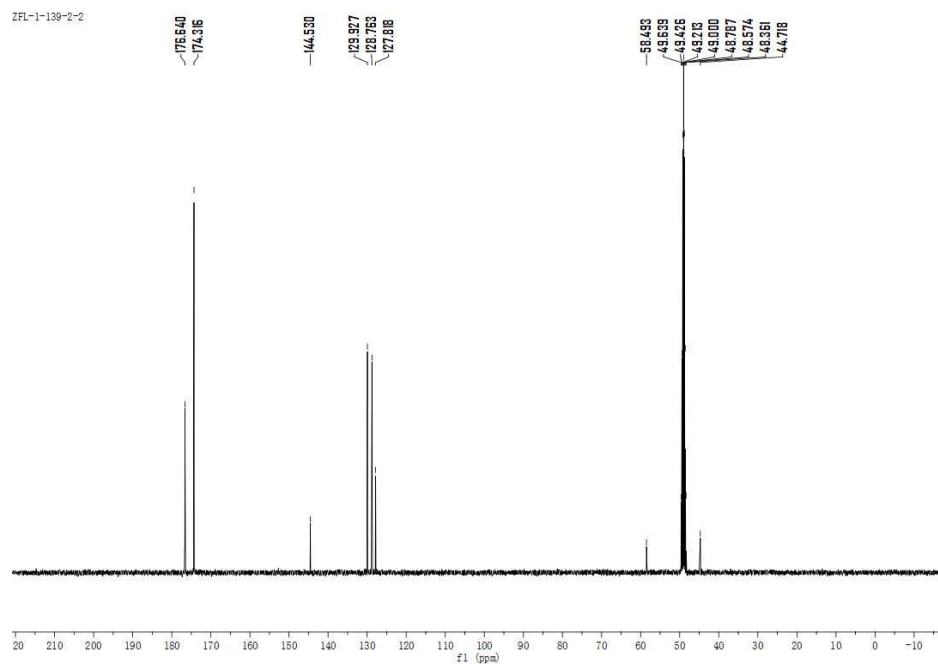

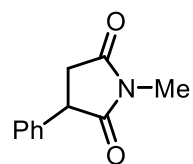

**$^1\text{H}$  NMR and  $^{13}\text{C}$  NMR spectra of 7**

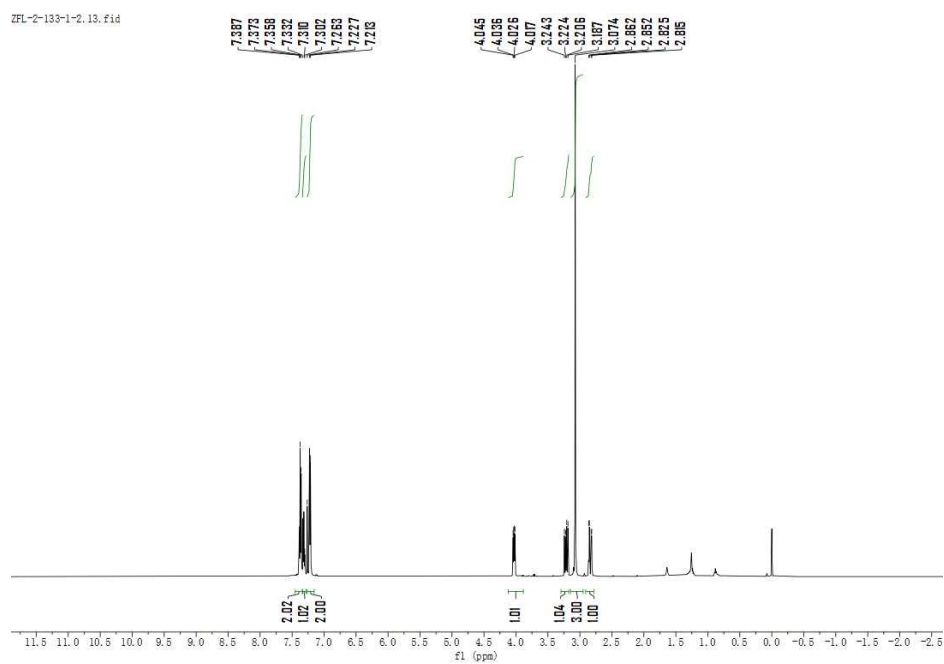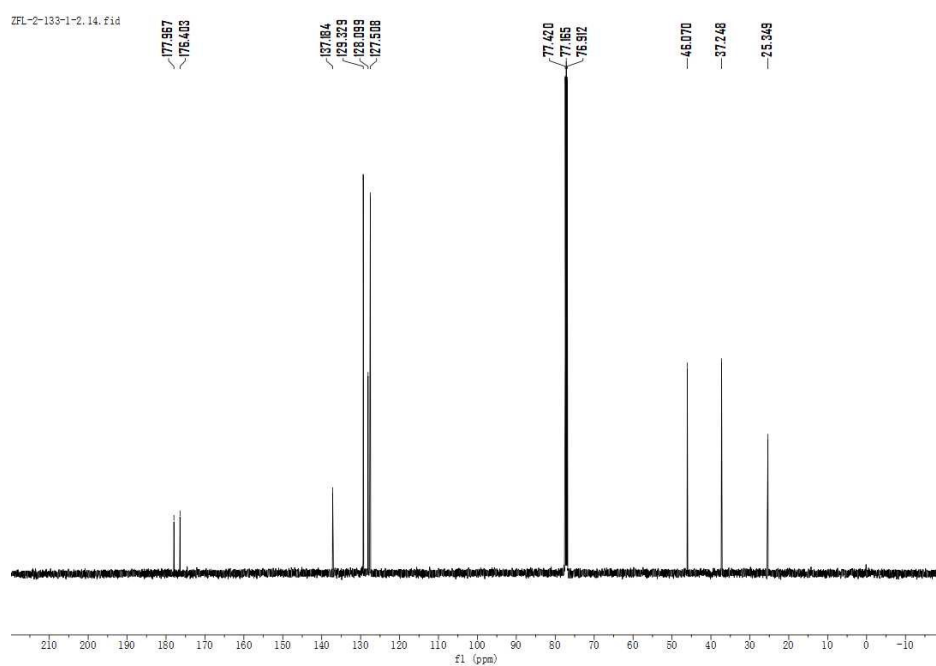

Supplement: d3sc04431a1.pdf [file d3sc04431a1.pdf]
